# Supplementary material
Source: PubMed Central journal article supplement (PMC5436539)

1 **SUPPLEMENTAL FIGURES**

A

| Symbol       | SAM-dependent Unique Methyltransferases      | GBM vs. Normal |       | Patient Survival Relevance |       | Functions of Product in Brain | Diseases Associated    | Ref.  |
|--------------|----------------------------------------------|----------------|-------|----------------------------|-------|-------------------------------|------------------------|-------|
|              |                                              | TCGA           | REMB. | TCGA                       | REMB. |                               |                        |       |
| <b>NNMT</b>  | Nicotinamide N-methyltransferase             | UP             | UP    | YES                        | YES   | Neurotoxin                    | Parkinson and Cancers  | 36,37 |
| <b>HNMT</b>  | Histamine N-methyltransferase                | UP             | UP    | NO                         | NO    | Enriched in Mast Cell         | Parkinson              | 38    |
| <b>COMT</b>  | Catechol O-methyltransferase                 | UP             | UP    | NO                         | NO    | Degradation of Dopamine       | Parkinson              | 39    |
| <b>PEMT</b>  | Phosphatidylethanolamine N-methyltransferase | UP             | UP    | NO                         | NO    | unknown                       | Obesity and Alzheimer  | 40,41 |
| <b>TRMT5</b> | TRNA N-methyltransferase                     | UP             | UP    | NO                         | NO    | unknown                       | Mitochondrial disorder | 42    |
| <b>GNMT</b>  | Glycine N-methyltransferase                  | DOWN           | N.S.  | NO                         | NO    | Sarcosine                     | Liver Cancer           | 43    |
| <b>PNMT</b>  | Phenylethanolamine N-methyltransferase       | DOWN           | N.S.  | NO                         | NO    | Adrenaline Synthesis          | Alzheimer              | 44    |
| <b>BHMT</b>  | Betaine-homocysteine S-methyltransferase     | DOWN           | DOWN  | NO                         | NO    | Neuroprotective               | Hyperhomocysteinemia   | 45    |
| <b>GAMT</b>  | Guanidinoacetate N-methyltransferase         | N.S.           | DOWN  | NO                         | NO    | Neurologic Syndrome           | Muscular Hypotonia     | 46    |
| <b>ASMT</b>  | Acetylserotonin O-methyltransferase          | DOWN           | N.S.  | YES                        | YES   | Melatonin Synthesis           | Autism                 | 47    |
| CARNMT1      | Carnosine N-methyltransferase                | N/A            | N.S.  | N/A                        | NO    | unknown                       | unknown                | N/A   |

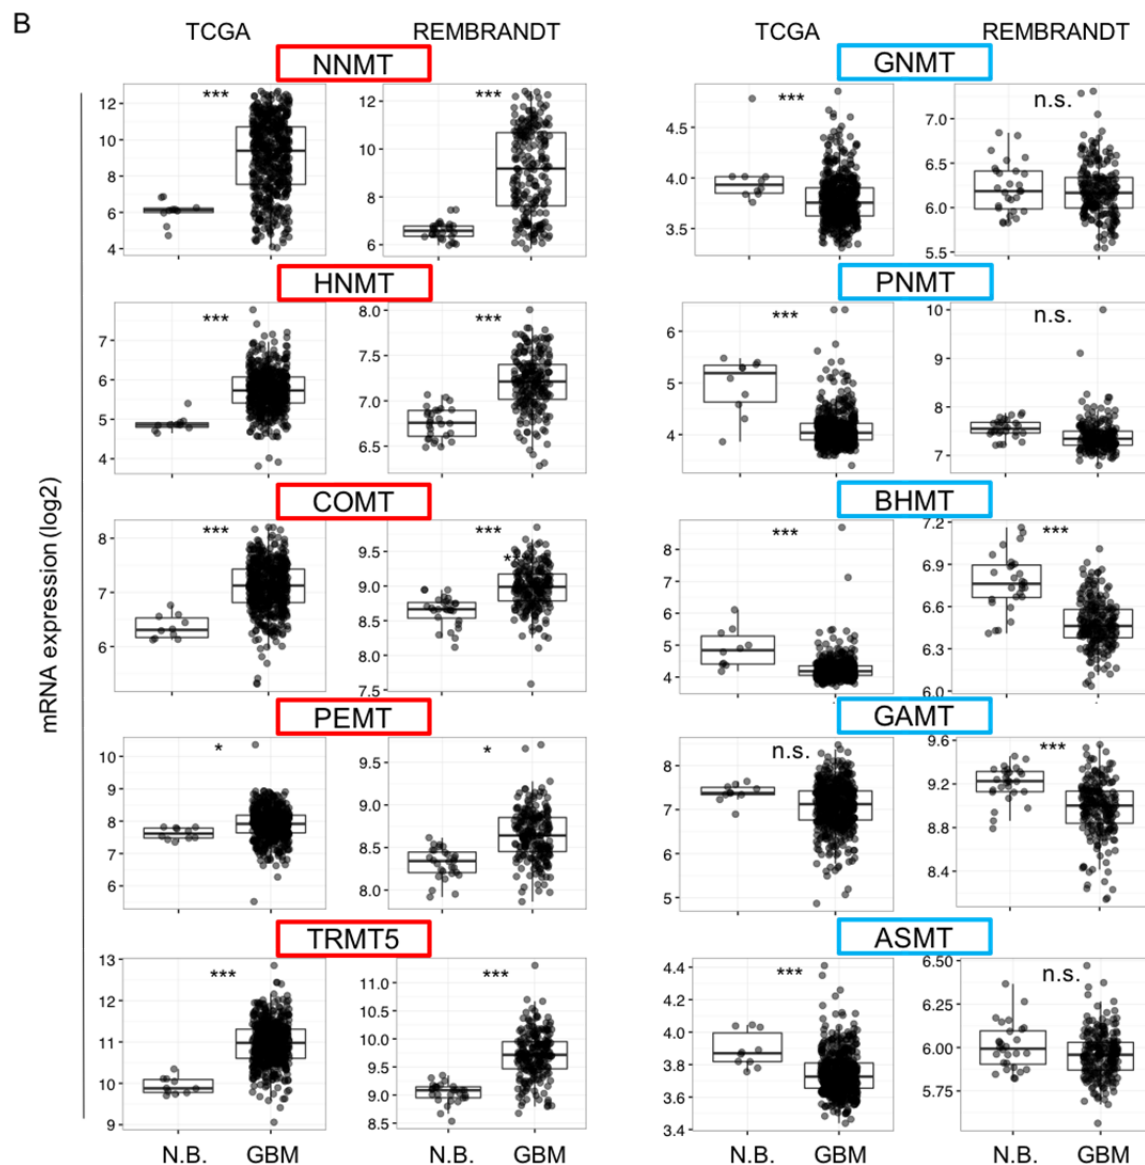

2  
3 **Supplemental Figure 1. Clinical relevance of natural product methyltransferases (NPMTs) in brain disorders. (A)**

4 Table summarizing characteristics of 11 NPMTs using data derived from the TCGA GBM and Rembrandt datasets for

5 relative expression levels and survival. In addition, published studies of the 11 NPMTs are summarized. (B) The

6 expression levels of 10 NPMTs in glioblastoma versus non-tumor brain are displayed in a heatmap, ranked by  
7 significance and expression levels. \*,  $p < 0.05$ ; \*\*,  $p < 0.01$ ; \*\*\*,  $p < 0.001$ .

8

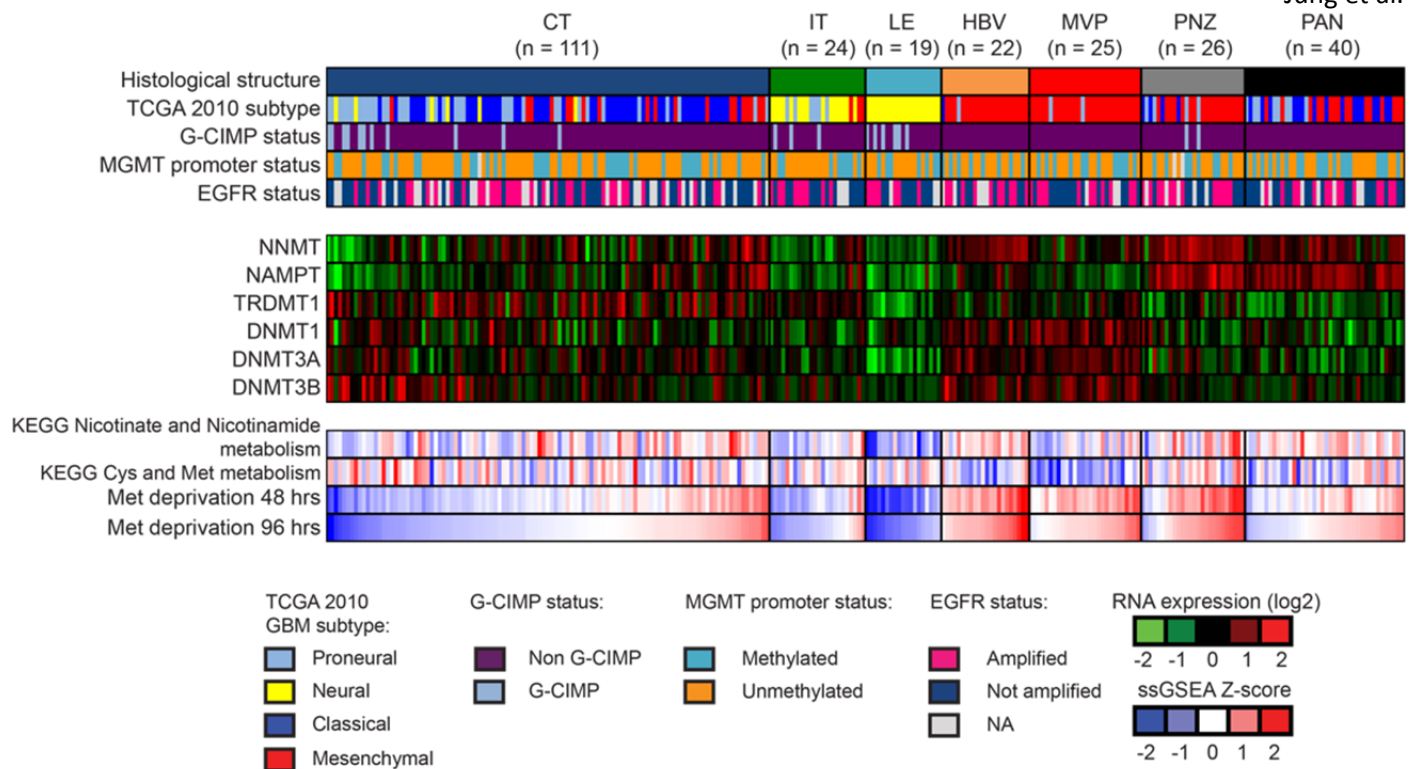

9  
 10 **Supplemental Figure 2. Anatomical distribution of methyltransferase and metabolic signatures within**  
 11 **glioblastomas.** The Ivy GAP dataset was downloaded and interrogated by histological structure for *NNMT*, *NAMPT*,  
 12 *DNMT* mRNA expression and selected gene expression signatures. The results are displayed on a heatmap. The  
 13 sample size of each histological region as indicated on the figure.

14

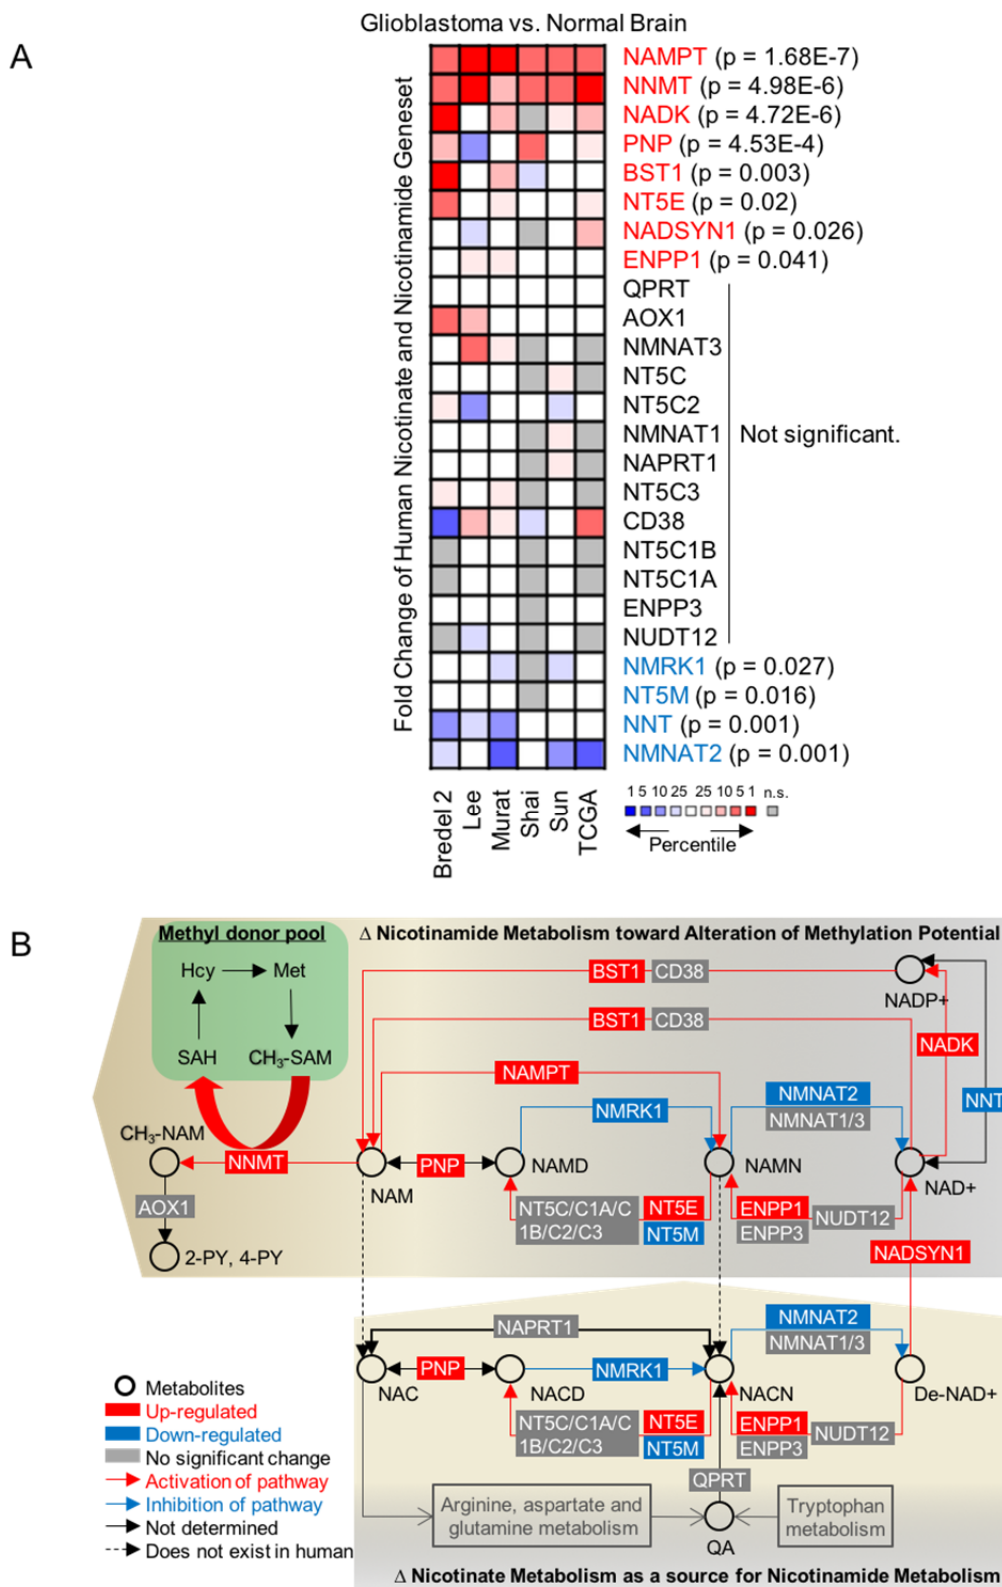

15  
 16 **Supplemental Figure 3. Altered expression of nicotinamide and nicotinate metabolism-related enzymes in**  
 17 **glioblastoma.** (A) Heatmap (fold change of expression) of whole 25 enzymes in the KEGG nicotinate and  
 18 nicotinamide metabolism gene set were analyzed in indicated glioblastoma expression datasets with OncoPrint.

19 Color bar intensity indicates percentile of fold change in glioblastoma relative to normal brain. (B) Nicotinamide and  
20 nicotinate and methionine salvage pathways are displayed with the relative expression levels in glioblastoma  
21 specimens in the TCGA GBM dataset indicated.

22

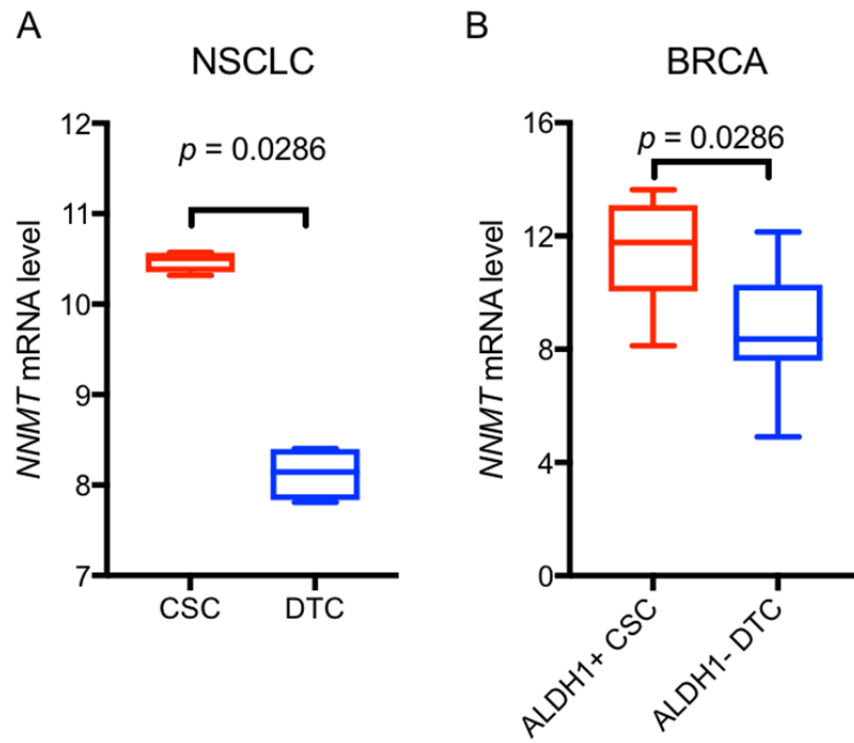

23  
 24 **Supplementary Figure 4. *NNMT* mRNA expression is up-regulated in cancer stem cells in NSCLC and BRCA. A and B.**  
 25 *NNMT* mRNA expression levels from respective transcriptome array datasets (30, 35).  
 26

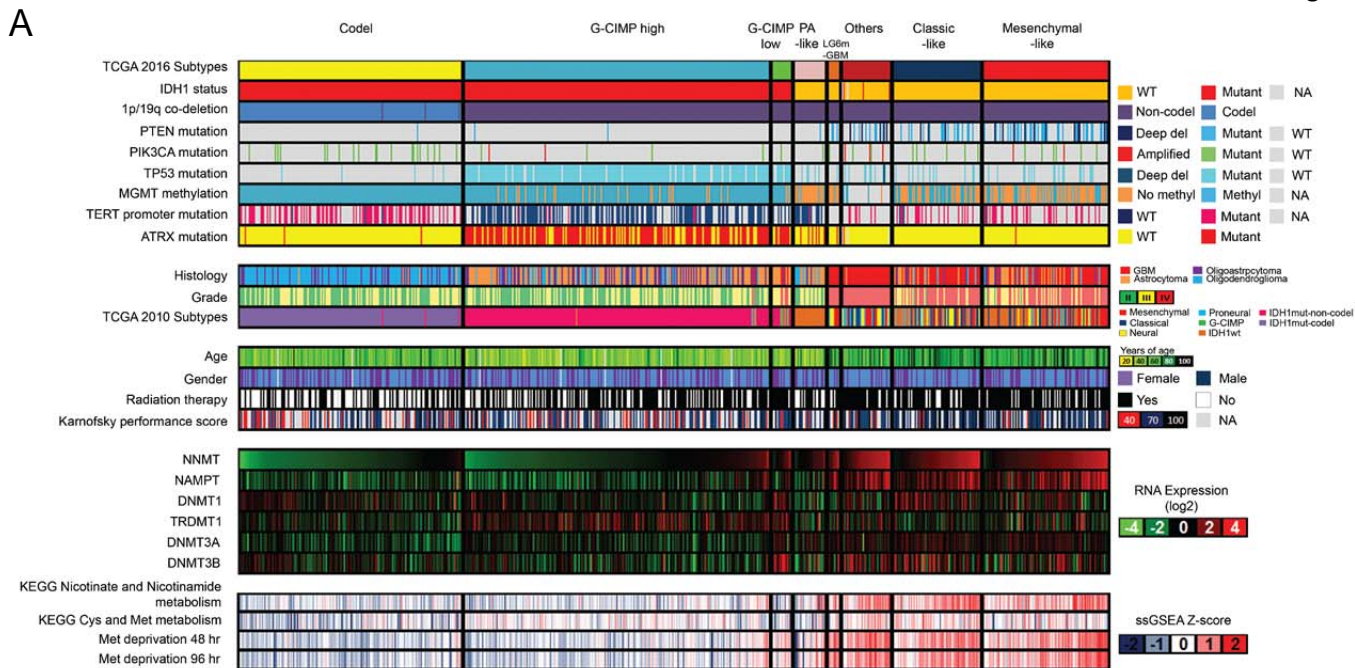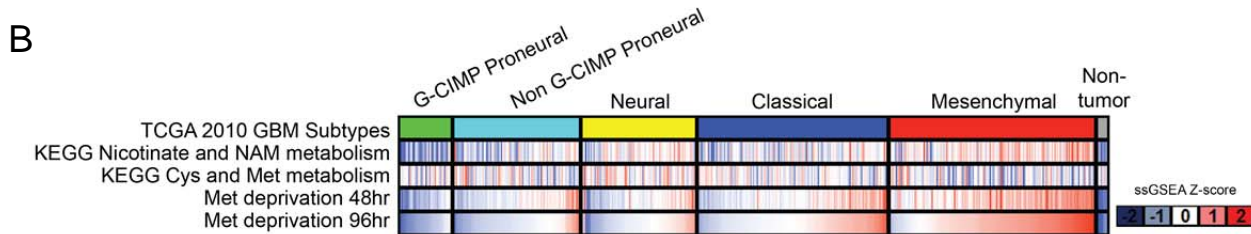

27  
 28 **Supplemental Figure 5. Intratumoral distribution of methyltransferase and metabolic signatures within gliomas.**  
 29 (A, B) The expression levels of *NNMT*, *NAMPT*, and *DNMTs* mRNA and metabolic signatures are displayed with  
 30 molecular and patient characteristics from as indicated from the (A) TCGA GBMLGG RNAseq dataset grouped by  
 31 TCGA 2016 pan-glioma subtypes (Codel, n = 167; G-CIMP high, n = 236; G-CIMP low, n = 17; PA-like, n = 11; Others, n  
 32 = 39; Classical-like, n = 69; Mesenchymal-like, n = 98) (6) or (B) TCGA GBM U133A microarray dataset grouped by  
 33 TCGA 2010 GBM molecular subtypes (G-CIMP Proneural, n = 41; Non-G-CIMP Proneural, n = 97; Neural, n = 84;  
 34 Classical, n = 145; Mesenchymal, n = 156; Non-tumor, n = 10) (4).  
 35

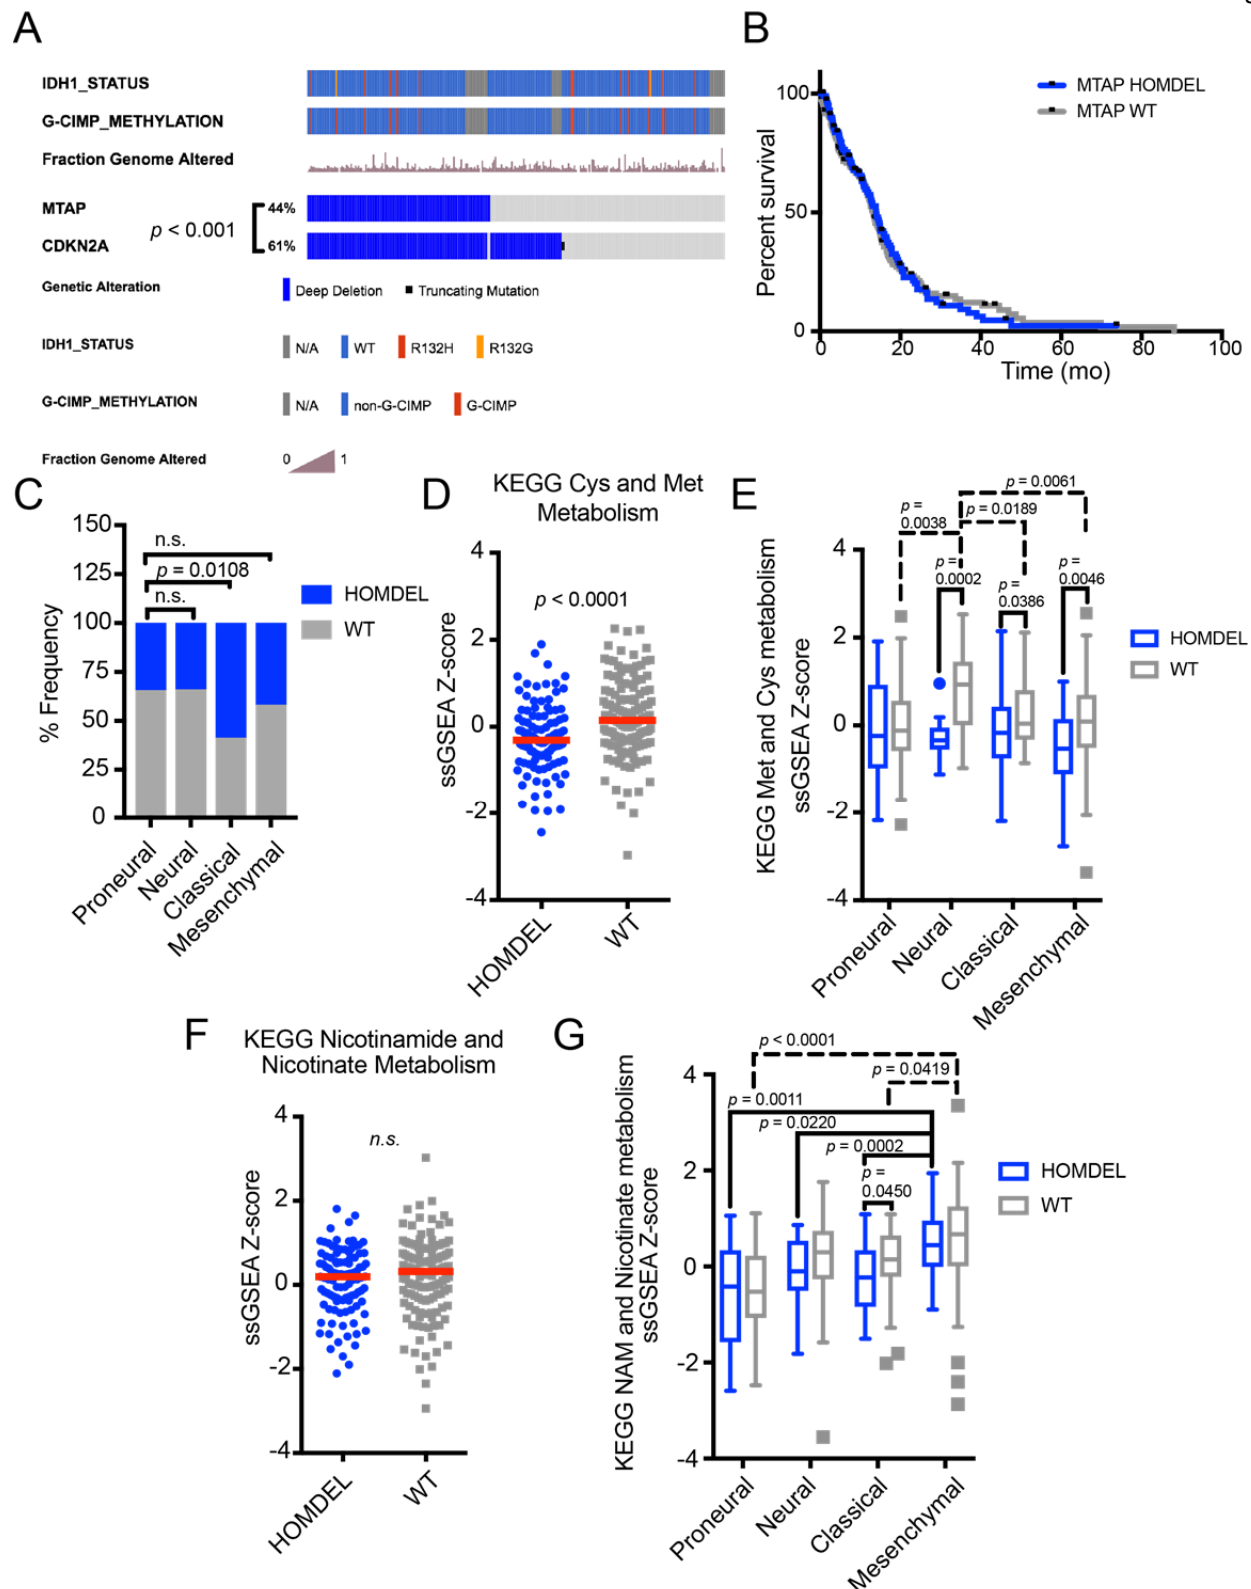

36  
37

**Supplementary Figure 6. MTAP genotype and nicotinamide metabolism in glioblastomas. (A)** MTAP and CDKN2A

38 copy number status in TCGA GBM dataset (n = 281). Copy number status and clinical tracks visualized on cBioportal.

39 (B) Kaplan-Meier survival curve of GBM patients stratified by MTAP copy number status in TCGA GBM dataset.

40 HOMDEL: homologous deletion (n = 123); WT: wild type (n = 158 ). (C) Frequency of tumor specimens with



41 homologous deletion or wild type copy number of *MTAP* in TCGA GBM specimens by molecular subtype. Significance  
42 of difference of distribution tested with Fisher exact test on sample counts. (D) Transcriptional signature scores of  
43 KEGG Methionine and Cysteine metabolism in TCGA GBM tumors with wild type or *MTAP* homozygous deletion. (E)  
44 KEGG Methionine and Cysteine metabolism signatures analyzed by *MTAP* genotype and by TCGA GBM molecular  
45 subtype. (F) Transcriptional signature scores of KEGG Nicotinamide and Nicotinate metabolism in TCGA GBM tumors  
46 with wild type or *MTAP* homozygous deletion. (G) KEGG Nicotinamide and Nicotinate metabolism signatures  
47 analyzed by *MTAP* genotype and by TCGA GBM molecular subtype.

48

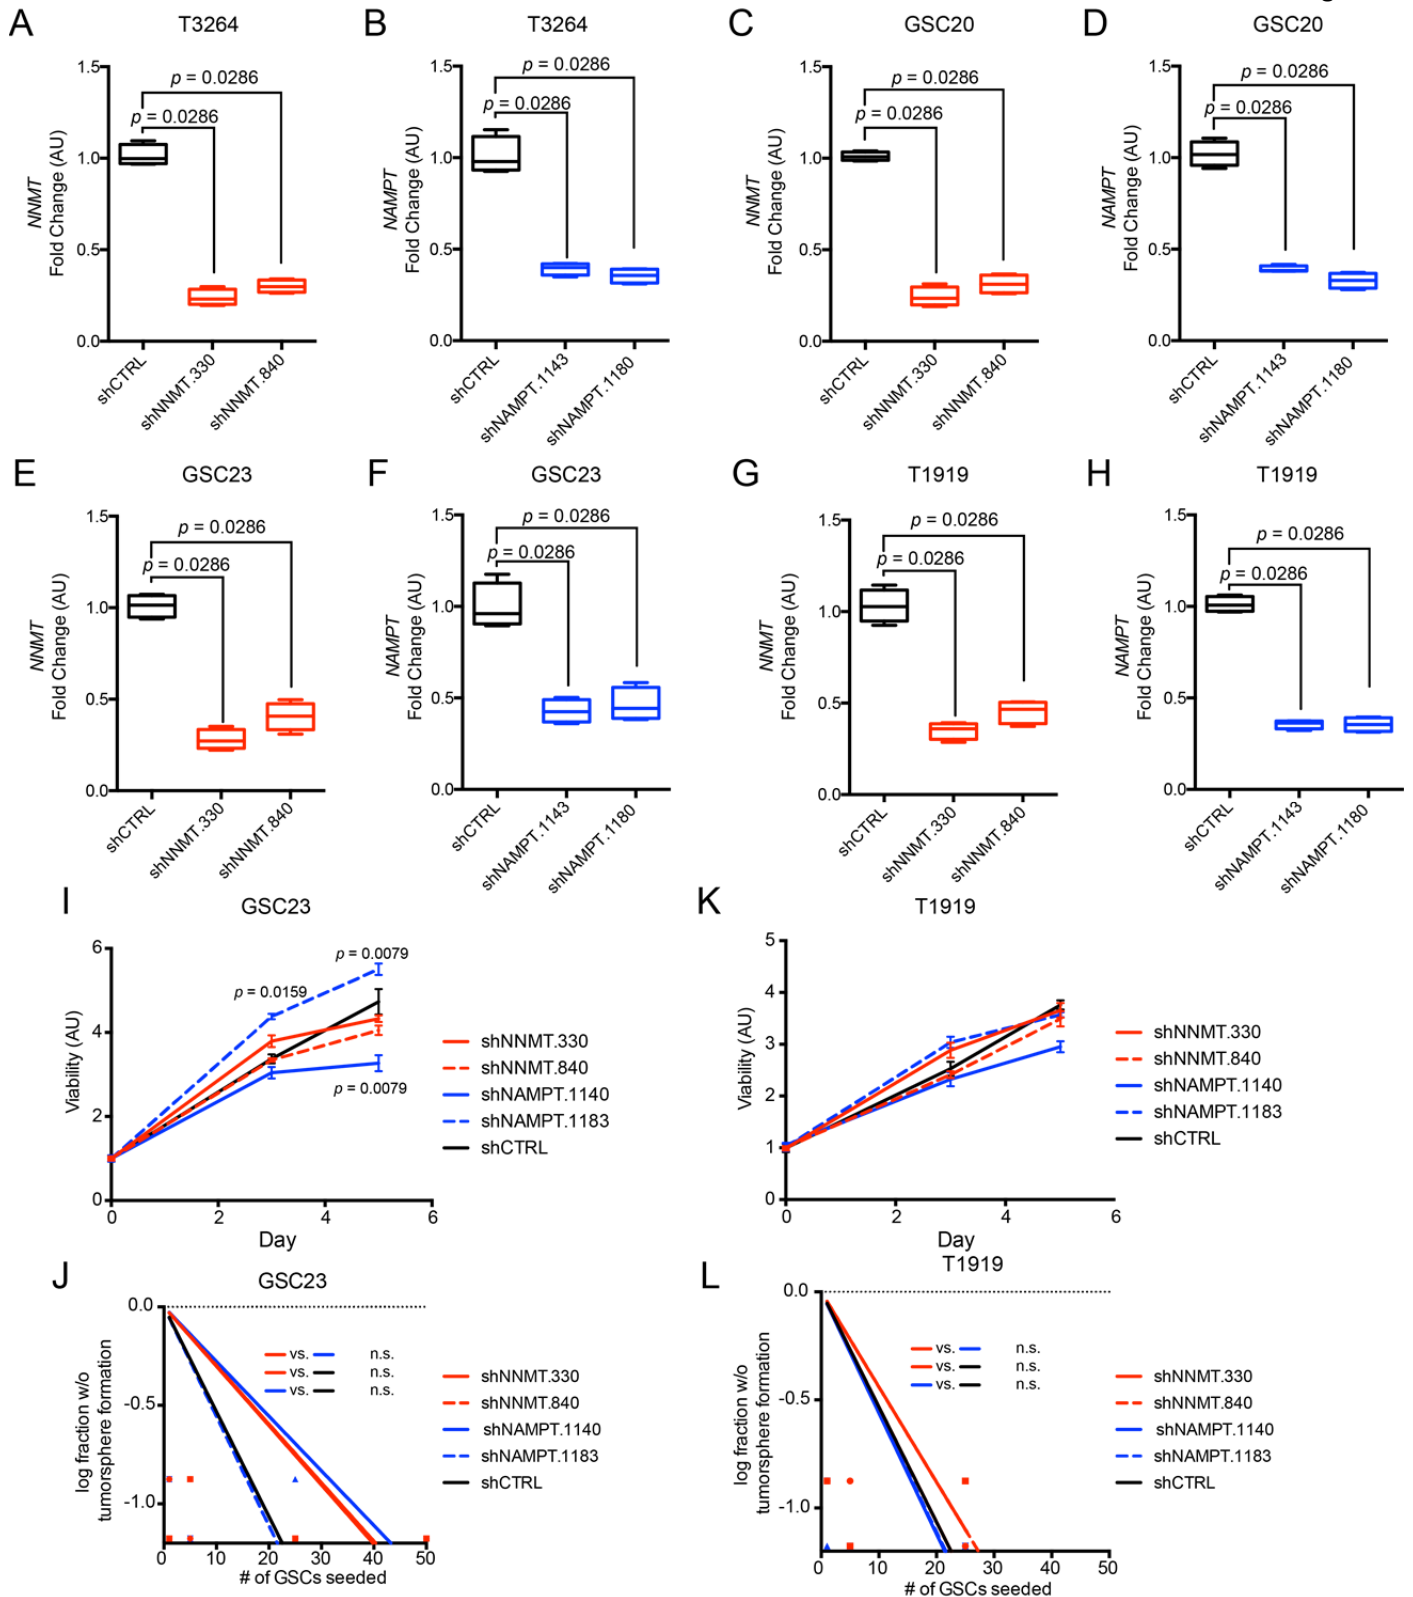

49  
50 **Supplemental Figure 7. *NNMT* RNAi does not impede in vitro viability and self-renewal capacity in proneural GSCs.**

51 (A-H) RT-PCR for *NNMT* or *NAMPT* knockdown efficiency in mesenchymal GSCs (T3264 and GSC20) or proneural  
52 GSCs (GSC20 and T1919) transduced with lentiviral shRNA clones targeting *NNMT* or *NAMPT* compared with non-  
53 targeting controls. For each condition, four technical replicates were analyzed. Mann-Whitney non-parametric test

54 for differences in median was utilized to test for significance. (I-L) In vitro limiting dilution assay and cell viability  
55 assay of (I, J) GSC23 or (K, L) T3264 GSCs transduced with shCTRL, shNNMT.830, shNNMT.330, shNAMPT.1140,  
56 shNAMPT.1183 lentivirus. Nonparametric Mann-Whitney test was used to determine significance in differences  
57 between median of shNNMT and shNAMPT treated samples.

58

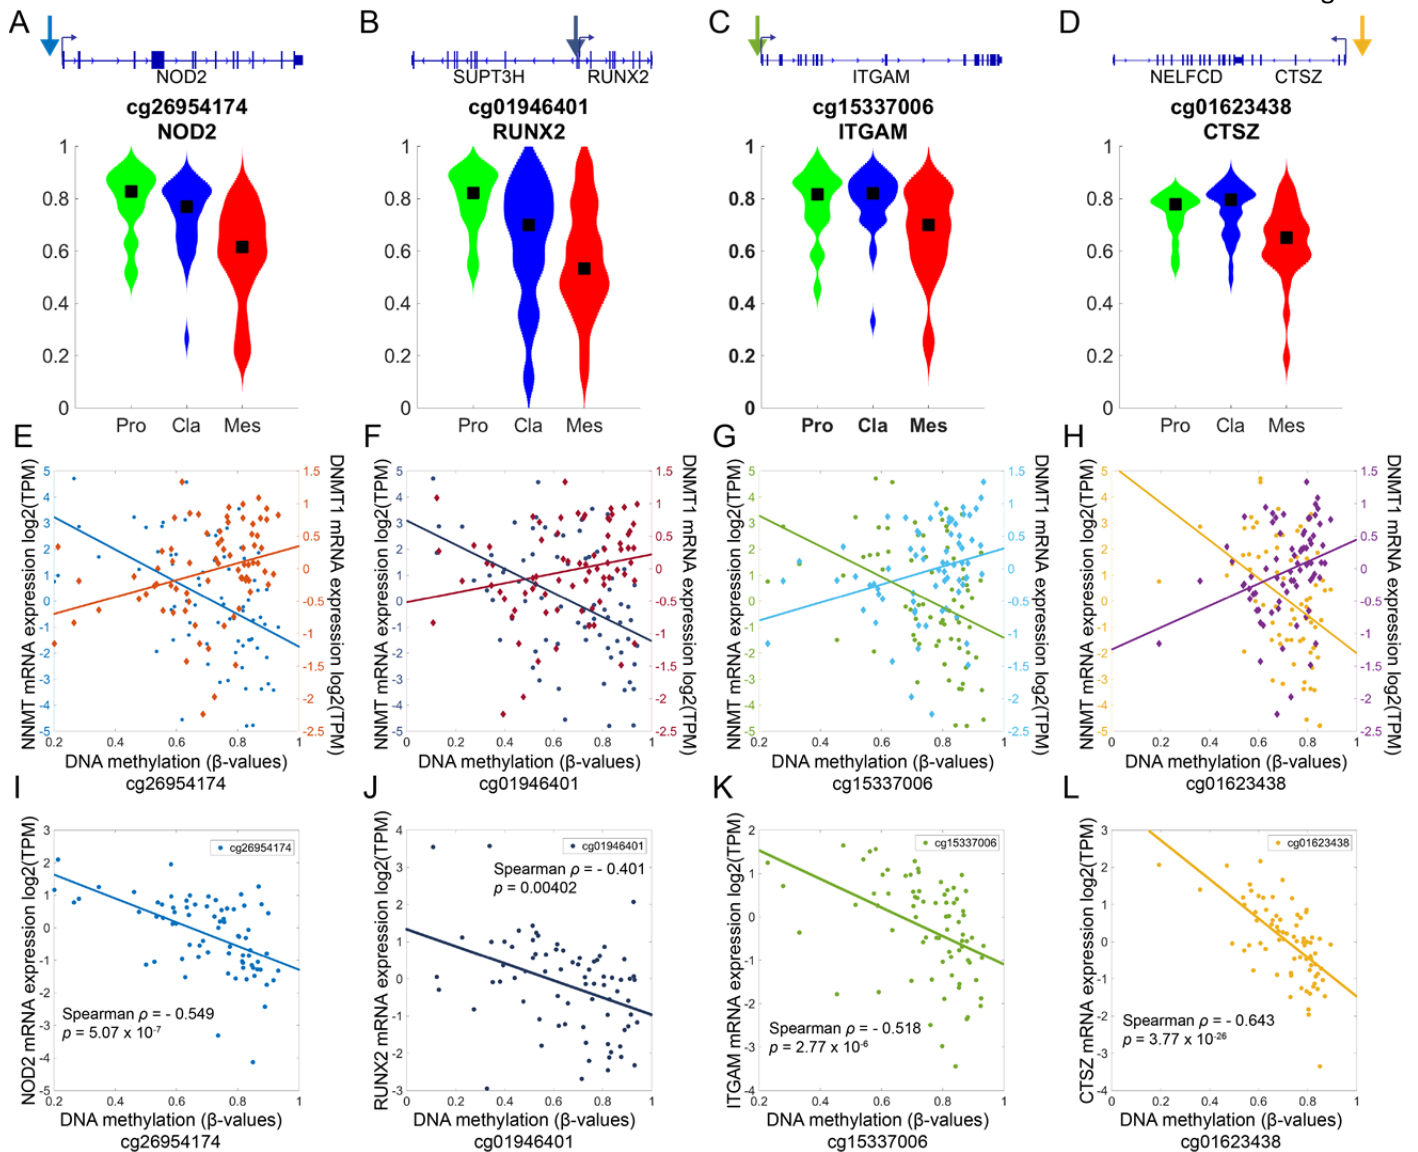

59

60

**Supplemental Figure 8. Mesenchymal subtype genes correlation with *NNMT* and *DNMT1* mRNA expression and**

61

**DNA methylation state. (A-D). Representative CpG probes annotated for mesenchymal subtype genes (*NOD2*,**

62

***RUNX2*, *ITGAM*, and *CTSZ*) and their DNA methylation state with significant anti-correlation with *NNMT* mRNA**

63

**expression. (E-H). Correlation between *NNMT* or *DNMT1* mRNA expression and DNA methylation of CpG probes**

64

**annotated for respective genes. (I-L). Correlation between respective gene mRNA expression and DNA methylation**

65

**state of CpG probe.**

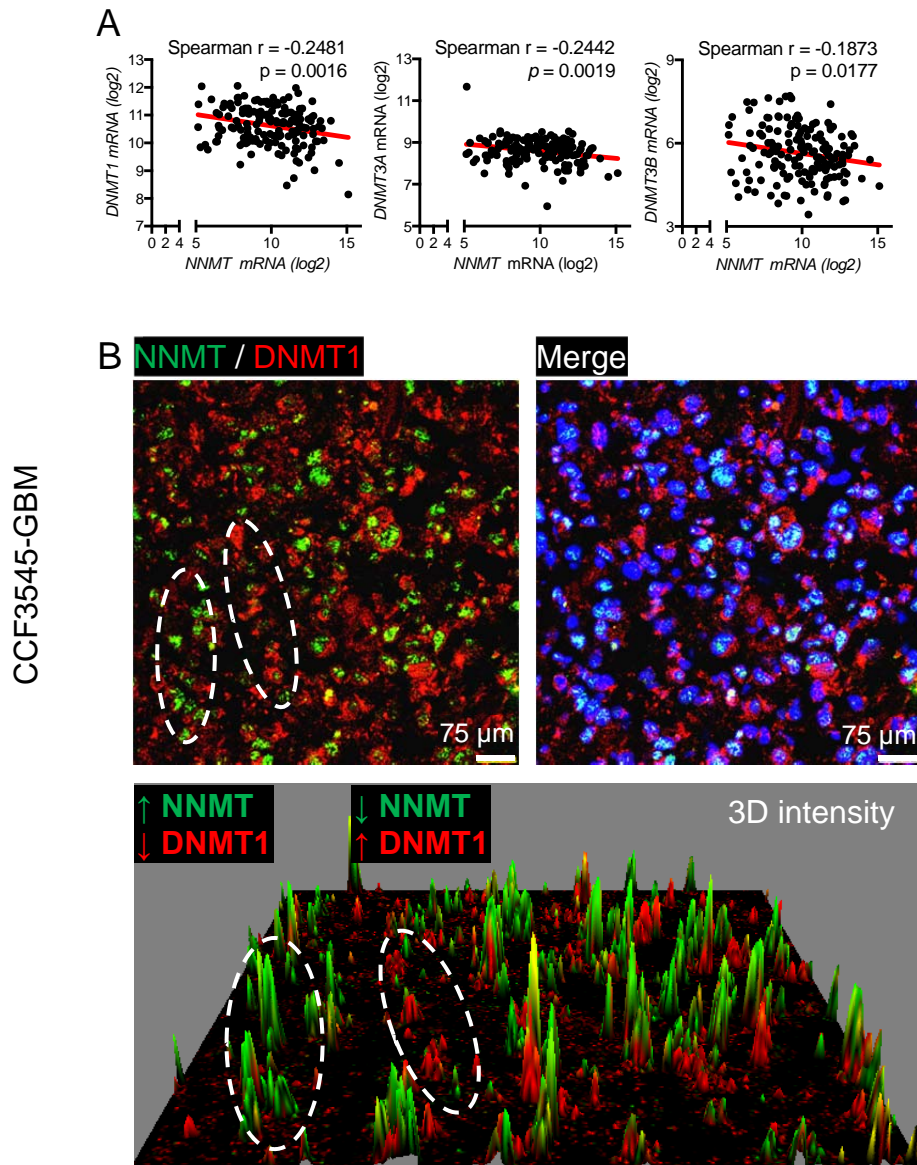

66  
67 **Supplemental Figure 9. Negative correlation between NNMT and DNMTs in mesenchymal glioblastoma.** (A)  
68 Correlative analysis of NNMT was performed with indicated DNMTs in of TCGA GBM database ( $n = 528$ ). Spearman  
69 correlation coefficients were calculated with GraphPad Prism. (B) Representative image of patient glioblastoma  
70 tissue with NNMT and DNMT1 staining. Frozen glioblastoma section was stained with anti-NNMT, anti-DNMT1  
71 antibodies, and DAPI. Scale bars: 75  $\mu\text{m}$ . The 3D quantified peaks of NNMT and DNMT1 were visualized with ImageJ.

72

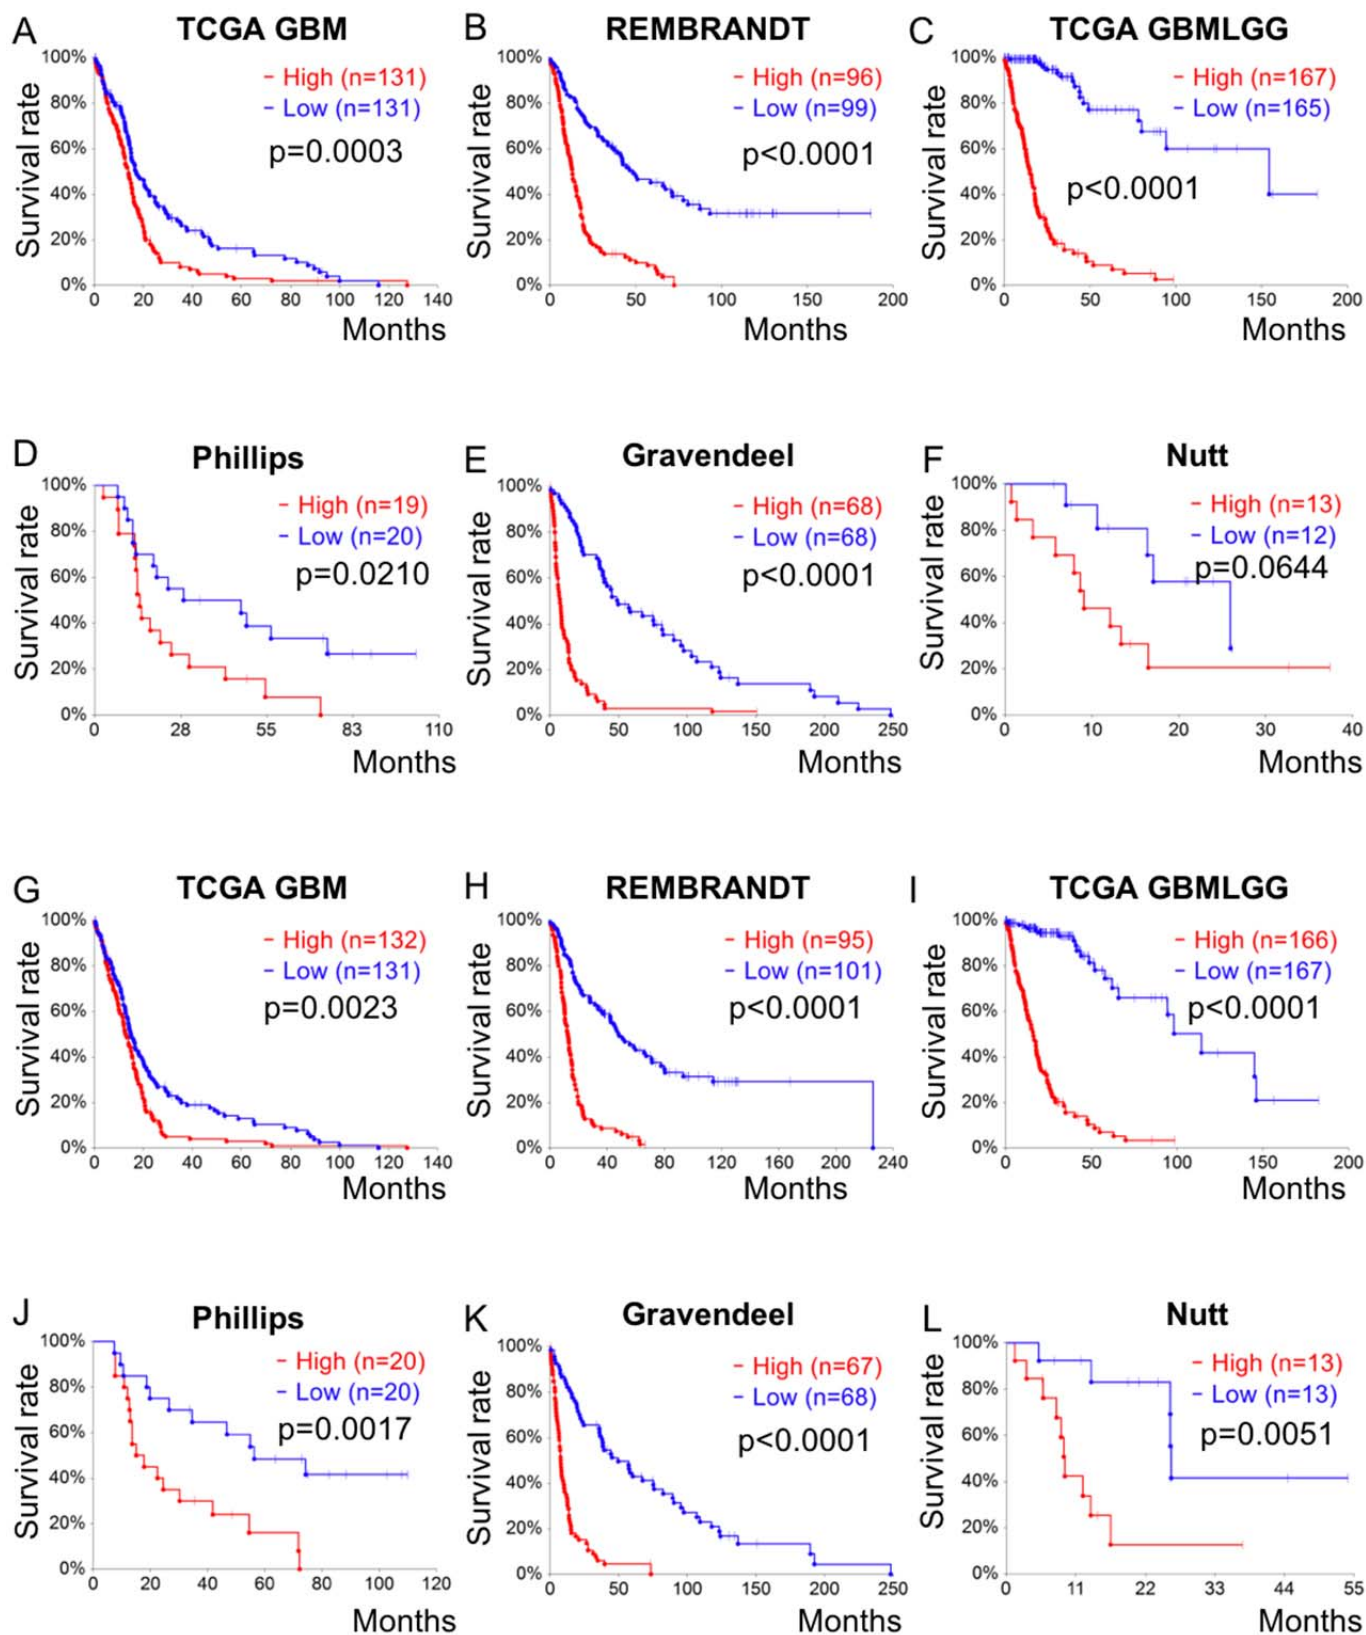73  
74

**Supplemental Figure 10. Kaplan-Meier survival curves of glioblastoma patients stratified by NNMT and NAMPT**

75

**expression.** (A-L) Patient survival data based on expression of *NNMT* (A-F) and *NAMPT* (G-L) were evaluated by high

76

versus low cut-off into different expression levels in the indicated databases using the top and bottom quartiles.

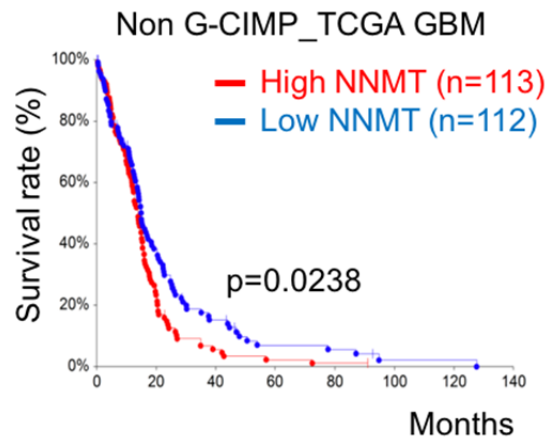

77  
78 **Supplemental Figure 11. Kaplan-Meier survival curve based on NNMT mRNA expression in non-G-CIMP**  
79 **glioblastomas from the TCGA GBM microarray dataset.** NNMT expression levels were divided with the exclusion of  
80 G-CIMP patients, in TCGA GBM database. P-value represents log-rank p-value.

81 **Supplementary Table 1. Metabolic gene expression differences between glioblastomas and non-tumor brain**  
82 **specimens in TCGA GBM dataset.**

83

84 **Supplementary Table 2. Correlation between *NNMT* mRNA expression and DNA methylation signatures in TCGA**  
85 **GBM dataset**

86

87 **Supplementary Table 3. Primers used for C/EBP $\beta$  CHIP-PCR and qMethyl-PCR**

88



**Supplemental Table 1: Metabolic gene expression fold changes - glioblastoma vs non-tumor in TCGA GBM dataset**

| Gene     | Description                                                             | Fold change<br>GBM vs NT | p-value     | FDR-adjusted p-<br>value |
|----------|-------------------------------------------------------------------------|--------------------------|-------------|--------------------------|
| A1CF     | APOBEC1 complementation factor                                          | -0.05396                 | 0.590164705 | 0.67709077               |
| A4GALT   | alpha 1,4-galactosyltransferase (globotriaosylceramide synthase)        | -0.50653                 | 4.73E-06    | 1.70E-05                 |
| A4GNT    | alpha-1,4-N-acetylglucosaminyltransferase                               | -0.01961                 | 0.777790697 | 0.834872485              |
| AACS     | acetoacetyl-CoA synthetase                                              | -1.74346                 | 2.42E-29    | 6.16E-28                 |
| AADAC    | arylacetamide deacetylase (esterase)                                    | 0.09560                  | 0.617847199 | 0.698600309              |
| AANAT    | arylalkylamine N-acetyltransferase                                      | -0.04109                 | 0.41280092  | 0.504038601              |
| AASDHPPT | aminoadipate-semialdehyde dehydrogenase-phosphopantetheinyl transferase | -0.76500                 | 3.81E-07    | 1.62E-06                 |
| AASS     | aminoadipate-semialdehyde synthase                                      | 1.37036                  | 7.34E-11    | 5.11E-10                 |
| ABAT     | 4-aminobutyrate aminotransferase                                        | -0.41349                 | 0.37681451  | 4.68E-01                 |
| ABCA1    | ATP-binding cassette, sub-family A (ABC1), member 1                     | 2.83143                  | 2.88E-15    | 2.91E-14                 |
| ABCA12   | ATP-binding cassette, sub-family A (ABC1), member 12                    | 0.03119                  | 0.764332416 | 0.823469954              |
| ABCA2    | ATP-binding cassette, sub-family A (ABC1), member 2                     | -1.17749                 | 2.13E-12    | 1.73E-11                 |
| ABCA3    | ATP-binding cassette, sub-family A (ABC1), member 3                     | -0.69196                 | 0.000249959 | 6.73E-04                 |
| ABCA4    | ATP-binding cassette, sub-family A (ABC1), member 4                     | -0.36770                 | 0.00280619  | 0.00609507               |
| ABCA5    | ATP-binding cassette, sub-family A (ABC1), member 5                     | -0.74635                 | 0.000812193 | 1.97E-03                 |
| ABCA6    | ATP-binding cassette, sub-family A (ABC1), member 6                     | 0.06202                  | 0.598636658 | 0.682956412              |
| ABCA7    | ATP-binding cassette, sub-family A (ABC1), member 7                     | -0.20289                 | 0.048029657 | 0.079321115              |
| ABCA8    | ATP-binding cassette, sub-family A (ABC1), member 8                     | -0.28415                 | 0.575069646 | 0.662764507              |
| ABCB1    | ATP-binding cassette, sub-family B (MDR/TAP), member 1                  | 0.04137                  | 0.894381571 | 0.928640313              |
| ABCB11   | ATP-binding cassette, sub-family B (MDR/TAP), member 11                 | -0.28834                 | 6.17E-12    | 4.77E-11                 |
| ABCB4    | ATP-binding cassette, sub-family B (MDR/TAP), member 4                  | 0.44581                  | 0.013718913 | 2.56E-02                 |
| ABCB6    | ATP-binding cassette, sub-family B (MDR/TAP), member 6                  | 0.01715                  | 0.857043577 | 0.898128655              |
| ABCB7    | ATP-binding cassette, sub-family B (MDR/TAP), member 7                  | 1.07976                  | 1.22E-16    | 1.40E-15                 |

|        |                                                                   |          |             |             |
|--------|-------------------------------------------------------------------|----------|-------------|-------------|
| ABCB8  | ATP-binding cassette, sub-family B (MDR/TAP), member 8            | 0.15617  | 0.064260539 | 0.10206381  |
| ABCB9  | ATP-binding cassette, sub-family B (MDR/TAP), member 9            | -0.64823 | 9.50E-08    | 4.42E-07    |
| ABCC1  | ATP-binding cassette, sub-family C (CFTR/MRP), member 1           | 0.51911  | 0.022931608 | 4.11E-02    |
| ABCC10 | ATP-binding cassette, sub-family C (CFTR/MRP), member 10          | 0.05053  | 0.715048658 | 0.782397159 |
| ABCC2  | ATP-binding cassette, sub-family C (CFTR/MRP), member 2           | -0.14174 | 0.411822461 | 0.503448624 |
| ABCC3  | ATP-binding cassette, sub-family C (CFTR/MRP), member 3           | 1.65029  | 0.000109353 | 3.12E-04    |
| ABCC4  | ATP-binding cassette, sub-family C (CFTR/MRP), member 4           | 1.26163  | 1.45E-08    | 7.51E-08    |
| ABCC5  | ATP-binding cassette, sub-family C (CFTR/MRP), member 5           | -1.38344 | 1.14E-09    | 6.97E-09    |
| ABCC6  | ATP-binding cassette, sub-family C (CFTR/MRP), member 6           | -0.12052 | 0.251629152 | 0.334572966 |
| ABCC8  | ATP-binding cassette, sub-family C (CFTR/MRP), member 8           | -1.14648 | 3.06E-24    | 6.04E-23    |
| ABCC9  | ATP-binding cassette, sub-family C (CFTR/MRP), member 9           | 0.04306  | 0.632554846 | 0.711274337 |
| ABCD1  | ATP-binding cassette, sub-family D (ALD), member 1                | 0.06176  | 0.380605549 | 0.471236956 |
| ABCD2  | ATP-binding cassette, sub-family D (ALD), member 2                | 0.08871  | 0.567117284 | 0.655745275 |
| ABCD3  | ATP-binding cassette, sub-family D (ALD), member 3                | 1.03598  | 3.39E-11    | 2.45E-10    |
| ABCD4  | ATP-binding cassette, sub-family D (ALD), member 4                | 0.52051  | 1.66E-08    | 8.55E-08    |
| ABCE1  | ATP-binding cassette, sub-family E (OABP), member 1               | 0.70008  | 1.31E-07    | 5.97E-07    |
| ABCF1  | ATP-binding cassette, sub-family F (GCN20), member 1              | 0.44050  | 0.002420273 | 5.35E-03    |
| ABCF2  | ATP-binding cassette, sub-family F (GCN20), member 2              | 0.56797  | 5.25E-06    | 1.87E-05    |
| ABCF3  | ATP-binding cassette, sub-family F (GCN20), member 3              | -0.29427 | 0.027976174 | 0.049200313 |
| ABCG1  | ATP-binding cassette, sub-family G (WHITE), member 1              | 0.39647  | 0.050354031 | 0.082423305 |
| ABCG2  | ATP-binding cassette, sub-family G (WHITE), member 2              | -0.11494 | 0.746556248 | 0.809034569 |
| ABCG4  | ATP-binding cassette, sub-family G (WHITE), member 4              | -1.05833 | 5.46E-43    | 3.47E-41    |
| ABCG5  | ATP-binding cassette, sub-family G (WHITE), member 5 (sterolin 1) | -0.29624 | 0.00392564  | 0.008261726 |
| ABHD10 | abhydrolase domain containing 10                                  | -0.68925 | 1.38E-05    | 4.57E-05    |
| ABHD11 | abhydrolase domain containing 11                                  | 0.25680  | 0.181589456 | 0.250795764 |

|         |                                                                                                                              |          |             |             |
|---------|------------------------------------------------------------------------------------------------------------------------------|----------|-------------|-------------|
| ABHD14A | abhydrolase domain containing 14A                                                                                            | -1.37714 | 1.31E-10    | 8.83E-10    |
| ABHD2   | abhydrolase domain containing 2                                                                                              | 0.41893  | 0.072707897 | 0.114283755 |
| ABHD3   | abhydrolase domain containing 3                                                                                              | 1.40451  | 3.51E-13    | 3.05E-12    |
| ABHD4   | abhydrolase domain containing 4                                                                                              | 1.35706  | 1.51E-12    | 1.23E-11    |
| ABHD5   | Abhydrolase domain containing 5                                                                                              | 0.90148  | 5.21E-10    | 3.30E-09    |
| ABHD6   | abhydrolase domain containing 6                                                                                              | -0.81912 | 6.78E-05    | 0.000199225 |
| ABHD8   | abhydrolase domain containing 8                                                                                              | -1.08289 | 3.84E-15    | 3.87E-14    |
| ABO     | ABO blood group (transferase A, alpha 1-3-N-acetylgalactosaminyltransferase; transferase B, alpha 1-3-galactosyltransferase) | -0.32221 | 1.10E-07    | 5.11E-07    |
| ABP1    | amiloride binding protein 1 (amine oxidase (copper-containing))                                                              | -0.09087 | 0.536131318 | 0.626410902 |
| ACAA1   | acetyl-Coenzyme A acyltransferase 1 (peroxisomal 3-oxoacyl-Coenzyme A thiolase)                                              | 0.51036  | 0.000257201 | 0.00068892  |
| ACAA2   | acetyl-Coenzyme A acyltransferase 2 (mitochondrial 3-oxoacyl-Coenzyme A thiolase)                                            | 0.05894  | 0.660873704 | 0.737407377 |
| ACACA   | acetyl-Coenzyme A carboxylase alpha                                                                                          | -0.46648 | 0.000119124 | 3.38E-04    |
| ACACB   | acetyl-Coenzyme A carboxylase beta                                                                                           | -0.29504 | 0.141590176 | 0.203573428 |
| ACAD10  | acyl-Coenzyme A dehydrogenase family, member 10                                                                              | 0.24116  | 0.014233481 | 0.026474536 |
| ACAD8   | acyl-Coenzyme A dehydrogenase family, member 8                                                                               | 0.63240  | 0.001717416 | 3.91E-03    |
| ACADL   | acyl-Coenzyme A dehydrogenase, long chain                                                                                    | -0.01177 | 0.939507793 | 0.958089295 |
| ACADM   | acyl-Coenzyme A dehydrogenase, C-4 to C-12 straight chain                                                                    | 0.90666  | 3.41E-10    | 2.20E-09    |
| ACADS   | acyl-Coenzyme A dehydrogenase, C-2 to C-3 short chain                                                                        | 0.04604  | 0.645790394 | 0.723356403 |
| ACADSB  | acyl-Coenzyme A dehydrogenase, short/branched chain                                                                          | -0.15767 | 0.136901962 | 0.198376114 |
| ACADVL  | acyl-Coenzyme A dehydrogenase, very long chain                                                                               | 0.73119  | 4.05E-05    | 1.24E-04    |
| ACAT1   | acetyl-Coenzyme A acetyltransferase 1 (acetoacetyl Coenzyme A thiolase)                                                      | 0.19290  | 0.158075324 | 0.2223994   |
| ACAT2   | acetyl-Coenzyme A acetyltransferase 2 (acetoacetyl Coenzyme A thiolase)                                                      | 0.16597  | 0.492484693 | 0.583802554 |
| ACBD3   | acyl-Coenzyme A binding domain containing 3                                                                                  | 0.60316  | 1.25E-05    | 4.16E-05    |
| ACBD4   | acyl-Coenzyme A binding domain containing 4                                                                                  | -0.34283 | 0.002328176 | 0.005161595 |
| ACE     | angiotensin I converting enzyme (peptidyl-dipeptidase A) 1                                                                   | -0.01515 | 0.813756838 | 0.864802746 |

|        |                                                            |          |             |             |
|--------|------------------------------------------------------------|----------|-------------|-------------|
| ACE2   | angiotensin I converting enzyme (peptidyl-dipeptidase A) 2 | 0.00967  | 0.91985272  | 0.943998273 |
| ACHE   | acetylcholinesterase (Yt blood group)                      | -0.14931 | 0.075898263 | 0.118601974 |
| ACLY   | ATP citrate lyase                                          | 0.55352  | 0.009734532 | 0.018865875 |
| ACN9   | ACN9 homolog ( <i>S. cerevisiae</i> )                      | 1.10243  | 0.000349546 | 9.18E-04    |
| ACO1   | aconitase 1, soluble                                       | 0.65689  | 5.32E-05    | 1.60E-04    |
| ACO2   | aconitase 2, mitochondrial                                 | -0.58947 | 1.43E-07    | 6.50E-07    |
| ACOT11 | acyl-CoA thioesterase 11                                   | 0.13330  | 0.135589413 | 0.19661432  |
| ACOT7  | acyl-CoA thioesterase 7                                    | -2.31509 | 9.66E-26    | 2.07E-24    |
| ACOT8  | Acyl-CoA thioesterase 8                                    | -0.90327 | 1.43E-10    | 9.56E-10    |
| ACOT9  | acyl-CoA thioesterase 9                                    | 1.03727  | 2.08E-07    | 9.33E-07    |
| ACOX1  | acyl-Coenzyme A oxidase 1, palmitoyl                       | 0.26181  | 0.000948833 | 0.002264058 |
| ACOX2  | acyl-Coenzyme A oxidase 2, branched chain                  | 1.17133  | 0.000207877 | 5.67E-04    |
| ACOX3  | acyl-Coenzyme A oxidase 3, pristanoyl                      | 0.43945  | 0.000422579 | 0.001091902 |
| ACOXL  | acyl-Coenzyme A oxidase-like                               | -0.15136 | 0.002715126 | 0.005916595 |
| ACSBG1 | acyl-CoA synthetase bubblegum family member 1              | -1.63704 | 4.28E-07    | 1.80E-06    |
| ACSBG2 | acyl-CoA synthetase bubblegum family member 2              | 0.15642  | 0.046891717 | 0.077757636 |
| ACSF2  | acyl-CoA synthetase family member 2                        | 0.05921  | 0.761575987 | 0.820935303 |
| ACSL1  | acyl-CoA synthetase long-chain family member 1             | 0.30075  | 0.329722498 | 0.420266983 |
| ACSL3  | acyl-CoA synthetase long-chain family member 3             | -0.76128 | 0.001028885 | 2.44E-03    |
| ACSL4  | Acyl-CoA synthetase long-chain family member 4             | 0.07562  | 0.711131098 | 0.779369015 |
| ACSL5  | acyl-CoA synthetase long-chain family member 5             | 0.08580  | 0.694589543 | 0.764951539 |
| ACSL6  | acyl-CoA synthetase long-chain family member 6             | -1.73102 | 9.54E-21    | 1.44E-19    |
| ACSM1  | acyl-CoA synthetase medium-chain family member 1           | -0.40313 | 8.10E-09    | 4.37E-08    |
| ACSM3  | acyl-CoA synthetase medium-chain family member 3           | 0.00707  | 0.958403696 | 0.971303447 |
| ACSM5  | acyl-CoA synthetase medium-chain family member 5           | 0.09499  | 0.665873971 | 0.740953356 |

|        |                                                             |          |             |             |
|--------|-------------------------------------------------------------|----------|-------------|-------------|
| ACSS3  | acyl-CoA synthetase short-chain family member 3             | 1.17486  | 0.004355798 | 9.08E-03    |
| ACYP1  | acylphosphatase 1, erythrocyte (common) type                | -0.75722 | 0.00034516  | 9.09E-04    |
| ACYP2  | acylphosphatase 2, muscle type                              | -0.92474 | 0.00103328  | 2.45E-03    |
| ADA    | adenosine deaminase                                         | 0.40218  | 0.079616618 | 0.123914684 |
| ADCY1  | adenylate cyclase 1 (brain)                                 | -0.17486 | 0.019337136 | 0.035163145 |
| ADCY10 | testicular soluble adenylyl cyclase                         | -0.03436 | 0.610097896 | 0.692921241 |
| ADCY2  | adenylate cyclase 2 (brain)                                 | -2.13307 | 4.07E-68    | 5.92E-66    |
| ADCY3  | adenylate cyclase 3                                         | -0.35684 | 0.001427399 | 0.003297615 |
| ADCY6  | adenylate cyclase 6                                         | 0.14379  | 0.248612392 | 0.330778137 |
| ADCY7  | adenylate cyclase 7                                         | 0.76544  | 0.000491977 | 1.26E-03    |
| ADCY8  | adenylate cyclase 8 (brain)                                 | 0.21515  | 0.483962891 | 0.575714779 |
| ADCY9  | Adenylate cyclase 9                                         | -0.30645 | 0.00022561  | 0.000612371 |
| ADH1A  | alcohol dehydrogenase 1A (class I), alpha polypeptide       | -0.04647 | 0.537020426 | 0.626729349 |
| ADH1B  | Alcohol dehydrogenase 1B (class I), beta polypeptide        | -0.00237 | 0.992505814 | 0.995393773 |
| ADH1C  | alcohol dehydrogenase 1C (class I), gamma polypeptide       | 0.08825  | 0.546638807 | 0.635401197 |
| ADH5   | alcohol dehydrogenase 5 (class III), chi polypeptide        | 0.64237  | 1.02E-06    | 4.14E-06    |
| ADH6   | alcohol dehydrogenase 6 (class V)                           | -0.11296 | 0.072741357 | 0.114283755 |
| ADH7   | alcohol dehydrogenase 7 (class IV), mu or sigma polypeptide | 0.21518  | 0.34122537  | 0.431949675 |
| ADI1   | acireductone dioxygenase 1                                  | 0.39194  | 0.09543326  | 0.143928648 |
| ADK    | adenosine kinase                                            | 0.38138  | 0.035392341 | 6.03E-02    |
| ADO    | 2-aminoethanethiol (cysteamine) dioxygenase                 | -0.59105 | 0.000183022 | 5.03E-04    |
| ADPGK  | ADP-dependent glucokinase                                   | 0.59154  | 0.000175757 | 4.85E-04    |
| ADSL   | adenylosuccinate lyase                                      | 0.54818  | 0.003376079 | 0.007186982 |
| ADSS   | Adenylosuccinate synthase                                   | -0.17420 | 0.391392318 | 0.482290782 |
| AGA    | aspartylglucosaminidase                                     | 1.48114  | 1.13E-10    | 7.65E-10    |

|         |                                                                                                                                                  |          |             |             |
|---------|--------------------------------------------------------------------------------------------------------------------------------------------------|----------|-------------|-------------|
| AGK     | acylglycerol kinase                                                                                                                              | -0.17502 | 0.226215633 | 0.305455617 |
| AGL     | amylo-1, 6-glucosidase, 4-alpha-glucanotransferase (glycogen debranching enzyme, glycogen storage disease type III)                              | 0.73757  | 0.000284991 | 0.000759354 |
| AGMAT   | agmatine ureohydrolase (agmatinase)                                                                                                              | -0.09565 | 0.141361139 | 0.203387966 |
| AGPAT1  | 1-acylglycerol-3-phosphate O-acyltransferase 1 (lysophosphatidic acid acyltransferase, alpha)                                                    | -0.23196 | 0.140848444 | 0.20279383  |
| AGPAT2  | 1-acylglycerol-3-phosphate O-acyltransferase 2 (lysophosphatidic acid acyltransferase, beta)                                                     | 0.11344  | 0.454808139 | 0.547115353 |
| AGPAT3  | 1-acylglycerol-3-phosphate O-acyltransferase 3                                                                                                   | -0.63460 | 7.55E-08    | 3.61E-07    |
| AGPAT4  | 1-acylglycerol-3-phosphate O-acyltransferase 4 (lysophosphatidic acid acyltransferase, delta)                                                    | -0.93731 | 3.41E-09    | 1.98E-08    |
| AGPAT5  | 1-acylglycerol-3-phosphate O-acyltransferase 5 (lysophosphatidic acid acyltransferase, epsilon)                                                  | 1.12014  | 7.01E-08    | 3.36E-07    |
| AGPS    | alkylglycerone phosphate synthase                                                                                                                | 0.86655  | 6.56E-06    | 2.30E-05    |
| AGXT    | alanine-glyoxylate aminotransferase                                                                                                              | -0.08116 | 0.186003656 | 0.255849414 |
| AGXT2L1 | alanine-glyoxylate aminotransferase 2-like 1                                                                                                     | -4.20223 | 4.09E-09    | 2.34E-08    |
| AHCY    | S-adenosylhomocysteine hydrolase                                                                                                                 | 0.81495  | 1.79E-05    | 5.81E-05    |
| AHCYL1  | S-adenosylhomocysteine hydrolase-like 1                                                                                                          | 0.09411  | 0.73786475  | 0.801752558 |
| AHCYL2  | S-adenosylhomocysteine hydrolase-like 2                                                                                                          | 0.15668  | 0.456828857 | 0.548572396 |
| AK1     | adenylate kinase 1                                                                                                                               | -0.56265 | 0.006913277 | 1.39E-02    |
| AK2     | adenylate kinase 2                                                                                                                               | 1.47406  | 2.50E-13    | 2.21E-12    |
| AK5     | adenylate kinase 5                                                                                                                               | -4.96120 | 7.97E-34    | 2.66E-32    |
| AKR1A1  | Aldo-keto reductase family 1, member A1 (aldehyde reductase)                                                                                     | 0.59916  | 1.78E-05    | 5.80E-05    |
| AKR1B1  | aldo-keto reductase family 1, member B1 (aldose reductase)                                                                                       | 0.31000  | 0.044178213 | 0.073739168 |
| AKR1B10 | aldo-keto reductase family 1, member B10 (aldose reductase)                                                                                      | 0.24595  | 0.551732633 | 0.640955681 |
| AKR1C1  | aldo-keto reductase family 1, member C1 (dihydrodiol dehydrogenase 1; 20-alpha (3-alpha)-hydroxysteroid dehydrogenase)                           | -2.06104 | 8.17E-05    | 2.36E-04    |
| AKR1C2  | Aldo-keto reductase family 1, member C2 (dihydrodiol dehydrogenase 2; bile acid binding protein; 3-alpha hydroxysteroid dehydrogenase, type III) | -2.01310 | 0.000163259 | 4.53E-04    |
| AKR1C3  | aldo-keto reductase family 1, member C3 (3-alpha hydroxysteroid dehydrogenase, type II)                                                          | -0.74890 | 0.172889283 | 0.239757103 |
| AKR1C4  | aldo-keto reductase family 1, member C4 (chlordecone reductase; 3-alpha hydroxysteroid dehydrogenase, type I; dihydrodiol dehydrogenase 4)       | -0.32144 | 3.84E-05    | 0.000117435 |
| AKR1D1  | aldo-keto reductase family 1, member D1 (delta 4-3-ketosteroid-5-beta-reductase)                                                                 | -0.01977 | 0.786348881 | 0.841393302 |

|          |                                                                                   |          |             |             |
|----------|-----------------------------------------------------------------------------------|----------|-------------|-------------|
| AKR7A2   | aldo-keto reductase family 7, member A2 (aflatoxin aldehyde reductase)            | 0.33049  | 0.029544502 | 0.051424633 |
| AKR7A3   | aldo-keto reductase family 7, member A3 (aflatoxin aldehyde reductase)            | 0.11540  | 0.36131743  | 0.45287197  |
| ALAD     | aminolevulinate, delta-, dehydratase                                              | -0.31333 | 0.007048837 | 0.014049299 |
| ALAS1    | aminolevulinate, delta-, synthase 1                                               | -0.46903 | 0.000793098 | 1.93E-03    |
| ALAS2    | aminolevulinate, delta-, synthase 2 (sideroblastic/hypochromic anemia)            | -0.20162 | 0.163280823 | 0.228328796 |
| ALDH18A1 | aldehyde dehydrogenase 18 family, member A1                                       | 0.64467  | 0.001754499 | 3.99E-03    |
| ALDH1A1  | aldehyde dehydrogenase 1 family, member A1                                        | -0.89020 | 0.082786915 | 1.28E-01    |
| ALDH1A2  | aldehyde dehydrogenase 1 family, member A2                                        | -0.84158 | 7.18E-09    | 3.92E-08    |
| ALDH1A3  | aldehyde dehydrogenase 1 family, member A3                                        | -0.40621 | 0.365058526 | 0.456997527 |
| ALDH1B1  | aldehyde dehydrogenase 1 family, member B1                                        | 0.23251  | 0.019568534 | 0.035552126 |
| ALDH1L1  | aldehyde dehydrogenase 1 family, member L1                                        | 0.05931  | 0.824514723 | 0.87304085  |
| ALDH2    | aldehyde dehydrogenase 2 family (mitochondrial)                                   | -1.19323 | 6.99E-07    | 2.91E-06    |
| ALDH3A1  | aldehyde dehydrogenase 3 family, member A1                                        | -0.01382 | 0.939099971 | 0.958089295 |
| ALDH3A2  | aldehyde dehydrogenase 3 family, member A2                                        | 0.82998  | 2.96E-06    | 1.12E-05    |
| ALDH3B1  | aldehyde dehydrogenase 3 family, member B1                                        | 0.34153  | 0.056997326 | 0.092110941 |
| ALDH3B2  | aldehyde dehydrogenase 3 family, member B2                                        | -0.09684 | 0.243897559 | 0.325570412 |
| ALDH4A1  | aldehyde dehydrogenase 4 family, member A1                                        | -0.05234 | 0.822375743 | 0.872138699 |
| ALDH5A1  | aldehyde dehydrogenase 5 family, member A1 (succinate-semialdehyde dehydrogenase) | -1.39706 | 8.20E-09    | 4.41E-08    |
| ALDH6A1  | aldehyde dehydrogenase 6 family, member A1                                        | -0.98414 | 0.000355749 | 9.31E-04    |
| ALDH7A1  | aldehyde dehydrogenase 7 family, member A1                                        | 0.53409  | 0.060048106 | 0.096048622 |
| ALDH8A1  | aldehyde dehydrogenase 8 family, member A1                                        | -0.56564 | 0.000141574 | 0.000397542 |
| ALDH9A1  | aldehyde dehydrogenase 9 family, member A1                                        | 0.49917  | 0.000121316 | 3.44E-04    |
| ALDOA    | aldolase A, fructose-bisphosphate                                                 | -0.60650 | 6.30E-06    | 2.22E-05    |
| ALDOB    | aldolase B, fructose-bisphosphate                                                 | -0.16283 | 0.000177223 | 0.000488867 |
| ALDOC    | aldolase C, fructose-bisphosphate                                                 | -2.01043 | 7.22E-06    | 2.51E-05    |

|         |                                                                                                                 |          |             |             |
|---------|-----------------------------------------------------------------------------------------------------------------|----------|-------------|-------------|
| ALG12   | asparagine-linked glycosylation 12 homolog ( <i>S. cerevisiae</i> , alpha-1,6-mannosyltransferase)              | 0.34303  | 0.002421994 | 0.005346268 |
| ALG13   | asparagine-linked glycosylation 13 homolog ( <i>S. cerevisiae</i> )                                             | 0.06753  | 0.665802864 | 0.740953356 |
| ALG3    | asparagine-linked glycosylation 3 homolog ( <i>S. cerevisiae</i> , alpha-1,3-mannosyltransferase)               | 1.05688  | 3.29E-10    | 2.13E-09    |
| ALG5    | Asparagine-linked glycosylation 5 homolog ( <i>S. cerevisiae</i> , dolichyl-phosphate beta-glucosyltransferase) | 0.74020  | 5.52E-05    | 0.000165413 |
| ALG6    | asparagine-linked glycosylation 6 homolog ( <i>S. cerevisiae</i> , alpha-1,3-glucosyltransferase)               | 2.06048  | 1.22E-17    | 1.46E-16    |
| ALG8    | asparagine-linked glycosylation 8 homolog ( <i>S. cerevisiae</i> , alpha-1,3-glucosyltransferase)               | 1.09939  | 3.89E-13    | 3.35E-12    |
| ALOX12  | arachidonate 12-lipoxygenase                                                                                    | 0.02228  | 0.788022194 | 0.8427402   |
| ALOX12B | arachidonate 12-lipoxygenase, 12R type                                                                          | -0.42717 | 2.31E-06    | 8.80E-06    |
| ALOX15  | arachidonate 15-lipoxygenase                                                                                    | -0.24005 | 6.48E-06    | 2.28E-05    |
| ALOX15B | arachidonate 15-lipoxygenase, type B                                                                            | 0.40360  | 0.086126027 | 1.32E-01    |
| ALOX5   | arachidonate 5-lipoxygenase                                                                                     | 0.15275  | 0.279828867 | 0.365377063 |
| ALOX5AP | arachidonate 5-lipoxygenase-activating protein                                                                  | 1.33301  | 0.00564404  | 1.15E-02    |
| ALOXE3  | arachidonate lipoxygenase 3                                                                                     | -0.28370 | 8.28E-07    | 3.39E-06    |
| AMACR   | alpha-methylacyl-CoA racemase                                                                                   | -0.24378 | 3.48E-05    | 0.000107058 |
| AMD1    | adenosylmethionine decarboxylase 1                                                                              | -0.32413 | 0.063442425 | 0.101001135 |
| AMDHD2  | amidohydrolase domain containing 2                                                                              | 0.31930  | 0.014510584 | 0.02696528  |
| AMPD1   | adenosine monophosphate deaminase 1 (isoform M)                                                                 | -0.31001 | 0.000889197 | 0.002131767 |
| AMPD2   | adenosine monophosphate deaminase 2 (isoform L)                                                                 | -1.01242 | 8.49E-11    | 5.85E-10    |
| AMPD3   | adenosine monophosphate deaminase (isoform E)                                                                   | -0.15787 | 0.302634392 | 0.390886734 |
| AMT     | aminomethyltransferase                                                                                          | -0.36228 | 0.139778365 | 0.201658853 |
| ANKH    | Ankylosis, progressive homolog (mouse)                                                                          | -1.20708 | 4.66E-17    | 5.42E-16    |
| AOAH    | acyloxyacyl hydrolase (neutrophil)                                                                              | 0.41050  | 0.076918569 | 0.119827932 |
| AOC2    | amine oxidase, copper containing 2 (retina-specific)                                                            | -0.13510 | 0.042232962 | 0.070899763 |
| AOC3    | amine oxidase, copper containing 3 (vascular adhesion protein 1)                                                | -0.07142 | 0.776088514 | 0.833485446 |
| AOX1    | aldehyde oxidase 1                                                                                              | 0.02449  | 0.898296584 | 0.93079016  |



|       |                                                               |          |             |             |
|-------|---------------------------------------------------------------|----------|-------------|-------------|
| APEH  | N-acylaminoacyl-peptide hydrolase                             | 0.52647  | 0.001029395 | 0.002444814 |
| APRT  | adenine phosphoribosyltransferase                             | 1.18730  | 5.01E-10    | 3.19E-09    |
| AQP1  | aquaporin 1 (Colton blood group)                              | 3.91324  | 6.74E-09    | 3.72E-08    |
| AQP2  | aquaporin 2 (collecting duct)                                 | -0.17115 | 0.029086274 | 0.050801027 |
| AQP3  | aquaporin 3 (Gill blood group)                                | -0.55027 | 0.005439329 | 0.011102566 |
| AQP4  | aquaporin 4                                                   | 0.00371  | 0.994521722 | 0.995393773 |
| AQP5  | aquaporin 5                                                   | -0.14358 | 0.138388348 | 0.199959852 |
| AQP6  | aquaporin 6, kidney specific                                  | -0.08751 | 0.210838519 | 0.286329131 |
| AQP7  | aquaporin 7                                                   | -0.02457 | 0.740688509 | 0.80396142  |
| AQP8  | aquaporin 8                                                   | -0.12188 | 0.076058556 | 0.11876117  |
| AQP9  | aquaporin 9                                                   | 0.30557  | 0.405530608 | 0.496952216 |
| ARG1  | Arginase, liver                                               | -0.23886 | 0.041781102 | 0.070329306 |
| ARG2  | arginase, type II                                             | -0.51146 | 0.007350078 | 1.46E-02    |
| ARSA  | Arylsulfatase A                                               | 0.21446  | 0.137332355 | 0.198858033 |
| ARSB  | arylsulfatase B                                               | 0.44529  | 6.34E-05    | 1.87E-04    |
| ARSD  | arylsulfatase D                                               | -0.10407 | 0.139437207 | 0.201332275 |
| ARSE  | arylsulfatase E (chondrodysplasia punctata 1)                 | 0.46898  | 0.028392687 | 0.049846574 |
| ARSF  | arylsulfatase F                                               | 0.26149  | 0.360182916 | 0.452007327 |
| ARSJ  | arylsulfatase family, member J                                | 1.41263  | 0.000174614 | 4.83E-04    |
| ASAH1 | N-acylsphingosine amidohydrolase (acid ceramidase) 1          | 0.29261  | 0.051579082 | 0.084022656 |
| ASL   | argininosuccinate lyase                                       | 0.40688  | 0.074735833 | 0.116875345 |
| ASMT  | acetylserotonin O-methyltransferase                           | -0.14760 | 0.000446008 | 0.001144867 |
| ASMTL | acetylserotonin O-methyltransferase-like                      | -0.53155 | 0.004974081 | 0.010223657 |
| ASNA1 | ArsA arsenite transporter, ATP-binding, homolog 1 (bacterial) | 0.10692  | 0.573086279 | 0.66122838  |
| ASNS  | Asparagine synthetase                                         | -0.69836 | 0.003494806 | 7.41E-03    |

|         |                                                                                    |          |             |             |
|---------|------------------------------------------------------------------------------------|----------|-------------|-------------|
| ASNSD1  | asparagine synthetase domain containing 1                                          | 0.37213  | 0.003341858 | 0.007129064 |
| ASPA    | aspartoacylase (Canavan disease)                                                   | -1.66483 | 8.03E-05    | 0.000233698 |
| ASRGL1  | asparaginase like 1                                                                | -1.38248 | 1.27E-06    | 5.07E-06    |
| ASS1    | argininosuccinate synthetase 1                                                     | -1.93850 | 3.41E-05    | 1.06E-04    |
| ATIC    | 5-aminoimidazole-4-carboxamide ribonucleotide formyltransferase/IMP cyclohydrolase | 0.35070  | 0.031500394 | 0.054271441 |
| ATP10A  | ATPase, class V, type 10A                                                          | -0.50345 | 1.32E-05    | 4.37E-05    |
| ATP10B  | ATPase, class V, type 10B                                                          | -0.61712 | 0.014026515 | 0.026137402 |
| ATP10D  | ATPase, class V, type 10D                                                          | 1.92948  | 1.37E-16    | 1.56E-15    |
| ATP11A  | ATPase, class VI, type 11A                                                         | -0.07503 | 0.517476088 | 0.607406979 |
| ATP11B  | ATPase, class VI, type 11B                                                         | 0.61103  | 0.002740856 | 0.005959531 |
| ATP12A  | ATPase, H+/K+ transporting, nongastric, alpha polypeptide                          | -0.17662 | 0.141954099 | 0.203664561 |
| ATP13A1 | ATPase type 13A1                                                                   | 0.51540  | 0.002567061 | 0.005641984 |
| ATP13A2 | ATPase type 13A2                                                                   | -1.96480 | 2.04E-21    | 3.21E-20    |
| ATP13A3 | ATPase type 13A3                                                                   | 0.80804  | 7.27E-07    | 3.01E-06    |
| ATP1A1  | ATPase, Na+/K+ transporting, alpha 1 polypeptide                                   | -0.25342 | 0.176589948 | 0.244056672 |
| ATP1A2  | ATPase, Na+/K+ transporting, alpha 2 polypeptide                                   | -1.84760 | 0.00473031  | 9.80E-03    |
| ATP1A3  | ATPase, Na+/K+ transporting, alpha 3 polypeptide                                   | -3.19608 | 1.05E-34    | 3.67E-33    |
| ATP1B1  | ATPase, Na+/K+ transporting, beta 1 polypeptide                                    | -1.96882 | 8.77E-11    | 6.03E-10    |
| ATP1B2  | ATPase, Na+/K+ transporting, beta 2 polypeptide                                    | -0.69087 | 0.186787935 | 2.56E-01    |
| ATP1B3  | ATPase, Na+/K+ transporting, beta 3 polypeptide                                    | 0.47936  | 0.001092723 | 2.57E-03    |
| ATP1B4  | ATPase, (Na+)/K+ transporting, beta 4 polypeptide                                  | -0.06986 | 0.172341721 | 0.2391609   |
| ATP2A1  | ATPase, Ca++ transporting, cardiac muscle, fast twitch 1                           | -0.07779 | 0.19657006  | 0.268386119 |
| ATP2A2  | ATPase, Ca++ transporting, cardiac muscle, slow twitch 2                           | -0.50076 | 0.010904946 | 0.020875476 |
| ATP2A3  | ATPase, Ca++ transporting, ubiquitous                                              | -0.01046 | 0.899199151 | 0.93079016  |
| ATP2B1  | ATPase, Ca++ transporting, plasma membrane 1                                       | -1.23496 | 3.20E-07    | 1.38E-06    |

|         |                                                                                           |          |             |             |
|---------|-------------------------------------------------------------------------------------------|----------|-------------|-------------|
| ATP2B2  | ATPase, Ca++ transporting, plasma membrane 2                                              | -2.49173 | 7.68E-29    | 1.90E-27    |
| ATP2B3  | ATPase, Ca++ transporting, plasma membrane 3                                              | -0.51830 | 2.83E-21    | 4.39E-20    |
| ATP2B4  | ATPase, Ca++ transporting, plasma membrane 4                                              | -0.63086 | 0.013047487 | 0.024560687 |
| ATP2C1  | ATPase, Ca++-sequestering                                                                 | -0.66167 | 3.99E-06    | 1.46E-05    |
| ATP2C2  | ATPase, Ca++ transporting, type 2C, member 2                                              | -0.45576 | 1.40E-05    | 4.63E-05    |
| ATP4A   | ATPase, H+/K+ exchanging, gastric, alpha polypeptide                                      | -0.11854 | 0.117221327 | 0.172439188 |
| ATP4B   | ATPase, H+/K+ exchanging, beta polypeptide                                                | -0.14316 | 0.07353904  | 0.115180946 |
| ATP5A1  | ATP synthase, H+ transporting, mitochondrial F1 complex, alpha subunit, isoform 1         | -0.33674 | 0.000369031 | 9.63E-04    |
| ATP5B   | ATP synthase, H+ transporting mitochondrial F1 complex, beta subunit                      | -0.44866 | 0.000656136 | 1.62E-03    |
| ATP5C1  | ATP synthase, H+ transporting, mitochondrial F1 complex, gamma polypeptide 1              | -0.66409 | 8.03E-06    | 2.77E-05    |
| ATP5D   | ATP synthase, H+ transporting, mitochondrial F1 complex, delta subunit                    | -0.31498 | 0.049143995 | 0.080702539 |
| ATP5E   | ATP synthase, H+ transporting, mitochondrial F1 complex, epsilon subunit                  | 0.59936  | 4.60E-09    | 2.61E-08    |
| ATP5F1  | ATP synthase, H+ transporting, mitochondrial F0 complex, subunit b, isoform 1             | 0.21532  | 0.045596473 | 0.075919435 |
| ATP5G1  | ATP synthase, H+ transporting, mitochondrial F0 complex, subunit c (subunit 9), isoform 1 | -0.40379 | 0.023780713 | 0.042483471 |
| ATP5G2  | ATP synthase, H+ transporting, mitochondrial F0 complex, subunit c (subunit 9), isoform 2 | 0.24754  | 0.000386173 | 0.001002668 |
| ATP5G3  | ATP synthase, H+ transporting, mitochondrial F0 complex, subunit c (subunit 9), isoform 3 | -0.22486 | 0.227716416 | 0.306587731 |
| ATP5H   | ATP synthase, H+ transporting, mitochondrial F0 complex, subunit d                        | -0.37075 | 0.000494235 | 0.001260703 |
| ATP5I   | ATP synthase, H+ transporting, mitochondrial F0 complex, subunit E                        | -0.00087 | 0.994216108 | 0.995393773 |
| ATP5J   | ATP synthase, H+ transporting, mitochondrial F0 complex, subunit F                        | -0.13572 | 0.226274549 | 0.305455617 |
| ATP5J2  | ATP synthase, H+ transporting, mitochondrial F0 complex, subunit f, isoform 2             | 0.35531  | 0.019804947 | 0.035917447 |
| ATP5L   | ATP synthase, H+ transporting, mitochondrial F0 complex, subunit g                        | 0.03963  | 0.746201872 | 0.809034569 |
| ATP5O   | ATP synthase, H+ transporting, mitochondrial F1 complex, O subunit                        | -0.13853 | 0.218736625 | 0.296066284 |
| ATP5S   | ATP synthase, H+ transporting, mitochondrial F0 complex, subunit s                        | 0.11976  | 0.512901455 | 0.605179926 |
| ATP5SL  | ATP5S-like                                                                                | -0.00085 | 0.994904155 | 0.995393773 |
| ATP6AP1 | ATPase, H+ transporting, lysosomal accessory protein 1                                    | -0.58654 | 1.08E-05    | 3.62E-05    |

|          |                                                                          |          |             |             |
|----------|--------------------------------------------------------------------------|----------|-------------|-------------|
| ATP6AP2  | ATPase, H+ transporting, lysosomal accessory protein 2                   | -0.49406 | 0.002869195 | 6.21E-03    |
| ATP6V0A1 | ATPase, H+ transporting, lysosomal V0 subunit A1                         | -2.00044 | 5.41E-32    | 1.67E-30    |
| ATP6V0A2 | ATPase, H+ transporting, lysosomal V0 subunit A2                         | 0.10969  | 0.351376081 | 0.44360354  |
| ATP6V0A4 | ATPase, H+ transporting, lysosomal V0 subunit A4                         | -0.02979 | 0.846095685 | 0.890420552 |
| ATP6V0B  | ATPase, H+ transporting, lysosomal V0 subunit B                          | -0.32023 | 0.060764327 | 0.096990014 |
| ATP6V0C  | ATPase, H+ transporting, lysosomal V0 subunit C                          | -1.20395 | 6.22E-22    | 1.02E-20    |
| ATP6V0D1 | ATPase, H+ transporting, lysosomal V0 subunit D1                         | -1.30795 | 2.66E-18    | 3.38E-17    |
| ATP6V0E1 | ATPase, H+ transporting, lysosomal V0 subunit E                          | 1.33774  | 2.13E-17    | 2.51E-16    |
| ATP6V0E2 | ATPase, H+ transporting, lysosomal V0 subunit E2                         | -0.62010 | 0.053123054 | 8.64E-02    |
| ATP6V1A  | ATPase, H+ transporting, lysosomal V1 subunit A                          | -1.87254 | 1.01E-22    | 1.75E-21    |
| ATP6V1B1 | ATPase, H+ transporting, lysosomal V1 subunit B1                         | -0.00976 | 0.941983171 | 0.959925707 |
| ATP6V1B2 | ATPase, H+ transporting, lysosomal V1 subunit B2                         | -1.75608 | 8.16E-23    | 1.44E-21    |
| ATP6V1C1 | ATPase, H+ transporting, lysosomal V1 subunit C1                         | -0.95528 | 1.47E-06    | 5.80E-06    |
| ATP6V1D  | ATPase, H+ transporting, lysosomal V1 subunit D                          | -1.01567 | 7.83E-13    | 6.57E-12    |
| ATP6V1E1 | ATPase, H+ transporting, lysosomal V1 subunit E1                         | -1.42565 | 3.99E-23    | 7.19E-22    |
| ATP6V1F  | ATPase, H+ transporting, lysosomal V1 subunit F                          | -0.18215 | 0.216863433 | 0.293726422 |
| ATP6V1G1 | ATPase, H+ transporting, lysosomal V1 subunit G1                         | 0.47973  | 6.61E-05    | 0.000194366 |
| ATP6V1G2 | ATPase, H+ transporting, lysosomal V1 subunit G2                         | -4.19070 | 9.61E-19    | 1.25E-17    |
| ATP6V1H  | ATPase, H+ transporting, lysosomal V1 subunit H                          | -1.96535 | 2.77E-44    | 1.94E-42    |
| ATP7A    | ATPase, Cu++ transporting, alpha polypeptide                             | 0.82537  | 4.07E-08    | 2.01E-07    |
| ATP7B    | ATPase, Cu++ transporting, beta polypeptide                              | -0.11159 | 0.434508159 | 0.526119766 |
| ATP8A1   | ATPase, aminophospholipid transporter (APLT), class I, type 8A, member 1 | -2.32999 | 2.58E-22    | 4.41E-21    |
| ATP8A2   | ATPase, aminophospholipid transporter-like, class I, type 8A, member 2   | -3.93400 | 1.07E-77    | 1.81E-75    |
| ATP8B1   | ATPase, class I, type 8B, member 1                                       | 0.91987  | 3.46E-05    | 1.07E-04    |
| ATP8B2   | ATPase, class I, type 8B, member 2                                       | 0.31545  | 0.001559272 | 0.003568911 |

|          |                                                                                        |          |             |             |
|----------|----------------------------------------------------------------------------------------|----------|-------------|-------------|
| ATP8B3   | ATPase, class I, type 8B, member 3                                                     | -0.18184 | 0.002126829 | 0.004745698 |
| ATP8B4   | ATPase, class I, type 8B, member 4                                                     | 0.41218  | 0.018045652 | 0.032962094 |
| ATP9A    | ATPase, class II, type 9A                                                              | -1.04137 | 4.08E-11    | 2.92E-10    |
| ATP9B    | ATPase, class II, type 9B                                                              | 0.06795  | 0.57108781  | 0.659296716 |
| AUH      | AU RNA binding protein/enoyl-Coenzyme A hydratase                                      | -1.32256 | 1.84E-17    | 2.17E-16    |
| B3GALNT1 | beta-1,3-N-acetylgalactosaminyltransferase 1 (globoside blood group)                   | 0.22440  | 0.351522529 | 0.44360354  |
| B3GALT1  | UDP-Gal:betaGlcNAc beta 1,3-galactosyltransferase, polypeptide 1                       | -0.33399 | 6.04E-08    | 2.93E-07    |
| B3GALT2  | UDP-Gal:betaGlcNAc beta 1,3-galactosyltransferase, polypeptide 2                       | -1.95708 | 4.78E-12    | 3.71E-11    |
| B3GALT4  | UDP-Gal:betaGlcNAc beta 1,3-galactosyltransferase, polypeptide 4                       | -0.11960 | 0.396543968 | 0.487114131 |
| B3GALT5  | UDP-Gal:betaGlcNAc beta 1,3-galactosyltransferase, polypeptide 5                       | 0.07945  | 0.096989988 | 0.145843673 |
| B3GAT1   | beta-1,3-glucuronyltransferase 1 (glucuronosyltransferase P)                           | -1.87913 | 2.78E-07    | 1.21E-06    |
| B3GAT3   | beta-1,3-glucuronyltransferase 3 (glucuronosyltransferase I)                           | 0.03621  | 0.766030365 | 0.82442548  |
| B3GNT1   | UDP-GlcNAc:betaGal beta-1,3-N-acetylglucosaminyltransferase 1                          | -1.85724 | 7.03E-14    | 6.41E-13    |
| B3GNT2   | UDP-GlcNAc:betaGal beta-1,3-N-acetylglucosaminyltransferase 2                          | -0.13312 | 0.574486176 | 0.66246761  |
| B3GNT3   | UDP-GlcNAc:betaGal beta-1,3-N-acetylglucosaminyltransferase 3                          | -0.19881 | 0.080343764 | 0.124876813 |
| B3GNT4   | UDP-GlcNAc:betaGal beta-1,3-N-acetylglucosaminyltransferase 4                          | -0.72622 | 8.12E-14    | 7.37E-13    |
| B3GNTL1  | UDP-GlcNAc:betaGal beta-1,3-N-acetylglucosaminyltransferase-like 1                     | -0.04184 | 0.611372443 | 0.693593849 |
| B4GALNT1 | beta-1,4-N-acetyl-galactosaminyl transferase 1                                         | -1.00375 | 0.000350759 | 9.20E-04    |
| B4GALT1  | UDP-Gal:betaGlcNAc beta 1,4- galactosyltransferase, polypeptide 1                      | -0.00137 | 0.982999698 | 0.989815941 |
| B4GALT2  | UDP-Gal:betaGlcNAc beta 1,4- galactosyltransferase, polypeptide 2                      | -0.33303 | 0.005614385 | 0.01144839  |
| B4GALT3  | UDP-Gal:betaGlcNAc beta 1,4- galactosyltransferase, polypeptide 3                      | 0.01966  | 0.890049069 | 0.925086788 |
| B4GALT4  | UDP-Gal:betaGlcNAc beta 1,4- galactosyltransferase, polypeptide 4                      | 0.96513  | 3.48E-09    | 2.02E-08    |
| B4GALT5  | UDP-Gal:betaGlcNAc beta 1,4- galactosyltransferase, polypeptide 5                      | 0.43190  | 0.0293394   | 0.051111397 |
| B4GALT6  | UDP-Gal:betaGlcNAc beta 1,4- galactosyltransferase, polypeptide 6                      | -1.30391 | 2.07E-14    | 1.99E-13    |
| B4GALT7  | xylosylprotein beta 1,4-galactosyltransferase, polypeptide 7 (galactosyltransferase I) | 0.29747  | 0.01145455  | 0.021804401 |

|         |                                                                                         |          |             |             |
|---------|-----------------------------------------------------------------------------------------|----------|-------------|-------------|
| BAAT    | bile acid Coenzyme A: amino acid N-acyltransferase (glycine N-choloyltransferase)       | -0.38031 | 8.60E-06    | 2.95E-05    |
| BBOX1   | butyrobetaine (gamma), 2-oxoglutarate dioxygenase (gamma-butyrobetaine hydroxylase) 1   | 0.87071  | 0.108507309 | 1.61E-01    |
| BCAT1   | branched chain aminotransferase 1, cytosolic                                            | 1.32682  | 0.000253734 | 6.81E-04    |
| BCAT2   | branched chain aminotransferase 2, mitochondrial                                        | 0.22996  | 0.037646169 | 0.063876301 |
| BCHE    | butyrylcholinesterase                                                                   | 2.68293  | 5.03E-08    | 2.45E-07    |
| BCKDHA  | branched chain keto acid dehydrogenase E1, alpha polypeptide                            | -0.26512 | 0.072612148 | 0.11425735  |
| BCKDHB  | branched chain keto acid dehydrogenase E1, beta polypeptide (maple syrup urine disease) | 0.42541  | 0.026133356 | 0.046279715 |
| BCMO1   | beta carotene 15, 15 monooxygenase 1                                                    | 0.35049  | 0.038600749 | 6.53E-02    |
| BDH1    | 3-hydroxybutyrate dehydrogenase, type 1                                                 | -1.19122 | 8.25E-07    | 3.38E-06    |
| BDH2    | 3-hydroxybutyrate dehydrogenase, type 2                                                 | 0.68015  | 0.001759713 | 0.003992741 |
| BEST1   | Bestrophin 1                                                                            | -0.85059 | 3.42E-05    | 0.000105578 |
| BEST2   | Bestrophin 2                                                                            | 0.16920  | 0.014844718 | 0.027535868 |
| BHMT    | Betaine-homocysteine methyltransferase                                                  | -0.66070 | 1.17E-08    | 6.10E-08    |
| BHMT2   | betaine-homocysteine methyltransferase 2                                                | -0.38275 | 0.084290968 | 0.129919286 |
| BLVRA   | Biliverdin reductase A                                                                  | 0.50316  | 0.002273164 | 5.05E-03    |
| BLVRB   | biliverdin reductase B (flavin reductase (NADPH))                                       | 0.15225  | 0.556508591 | 0.645397585 |
| BPGM    | 2,3-bisphosphoglycerate mutase                                                          | 0.94370  | 4.30E-06    | 1.56E-05    |
| BPHL    | biphenyl hydrolase-like (serine hydrolase; breast epithelial mucin-associated antigen)  | 0.09317  | 0.577190919 | 0.664832373 |
| BPNT1   | 3'(2'), 5'-bisphosphate nucleotidase 1                                                  | 0.05251  | 0.596062351 | 0.681853386 |
| BST1    | bone marrow stromal cell antigen 1                                                      | 0.54181  | 0.004753279 | 0.009840546 |
| BTD     | biotinidase                                                                             | 0.55273  | 0.000295699 | 7.87E-04    |
| C1GALT1 | core 1 synthase, glycoprotein-N-acetylgalactosamine 3-beta-galactosyltransferase, 1     | 0.52486  | 0.003785311 | 7.98E-03    |
| CA1     | carbonic anhydrase I                                                                    | -0.17334 | 0.009498427 | 0.018461093 |
| CA10    | carbonic anhydrase X                                                                    | -2.69514 | 2.58E-07    | 1.13E-06    |
| CA11    | carbonic anhydrase XI                                                                   | -3.81380 | 8.54E-31    | 2.41E-29    |

|          |                                                                |          |             |             |
|----------|----------------------------------------------------------------|----------|-------------|-------------|
| CA12     | carbonic anhydrase XII                                         | 2.17838  | 3.37E-06    | 1.26E-05    |
| CA14     | carbonic anhydrase XIV                                         | 0.15856  | 0.663291848 | 0.738888946 |
| CA2      | carbonic anhydrase II                                          | 0.81860  | 0.041789376 | 7.03E-02    |
| CA3      | carbonic anhydrase III, muscle specific                        | 1.83280  | 0.001688626 | 3.85E-03    |
| CA4      | carbonic anhydrase IV                                          | -2.37409 | 1.10E-22    | 1.89E-21    |
| CA5A     | carbonic anhydrase VA, mitochondrial                           | 0.01288  | 0.912703974 | 0.941414094 |
| CA5B     | carbonic anhydrase VB, mitochondrial                           | -0.07553 | 0.422061916 | 0.512269777 |
| CA6      | carbonic anhydrase VI                                          | -0.24735 | 0.019833185 | 0.035936601 |
| CA7      | carbonic anhydrase VII                                         | -0.90282 | 1.51E-29    | 3.93E-28    |
| CA8      | carbonic anhydrase VIII                                        | -0.06016 | 0.819225705 | 0.869251492 |
| CA9      | carbonic anhydrase IX                                          | 0.72868  | 0.060779772 | 9.70E-02    |
| CACNA1A  | calcium channel, voltage-dependent, P/Q type, alpha 1A subunit | -1.22902 | 7.22E-09    | 3.94E-08    |
| CACNA1B  | calcium channel, voltage-dependent, N type, alpha 1B subunit   | -0.39014 | 3.10E-12    | 2.46E-11    |
| CACNA1C  | calcium channel, voltage-dependent, L type, alpha 1C subunit   | -0.29489 | 1.60E-08    | 8.28E-08    |
| CACNA1D  | calcium channel, voltage-dependent, L type, alpha 1D subunit   | -0.95930 | 5.60E-14    | 5.15E-13    |
| CACNA1E  | calcium channel, voltage-dependent, R type, alpha 1E subunit   | -0.16596 | 0.002228584 | 0.004957015 |
| CACNA1F  | calcium channel, voltage-dependent, alpha 1F subunit           | -0.20777 | 0.021081478 | 0.037928004 |
| CACNA1G  | calcium channel, voltage-dependent, T type, alpha 1G subunit   | -0.34800 | 1.51E-06    | 5.94E-06    |
| CACNA1H  | calcium channel, voltage-dependent, T type, alpha 1H subunit   | -0.34811 | 8.12E-05    | 0.000235089 |
| CACNA1I  | calcium channel, voltage-dependent, T type, alpha 1I subunit   | -0.41707 | 5.42E-10    | 3.43E-09    |
| CACNA1S  | calcium channel, voltage-dependent, L type, alpha 1S subunit   | -0.39398 | 3.47E-11    | 2.49E-10    |
| CACNA2D1 | calcium channel, voltage-dependent, alpha2/delta subunit 1     | -0.45605 | 1.06E-08    | 5.61E-08    |
| CACNA2D2 | calcium channel, voltage-dependent, alpha 2/delta subunit 2    | -1.76696 | 7.65E-10    | 4.75E-09    |
| CACNA2D3 | calcium channel, voltage-dependent, alpha2/delta subunit 3     | -3.88905 | 5.78E-46    | 4.19E-44    |
| CACNB1   | calcium channel, voltage-dependent, beta 1 subunit             | -1.21405 | 2.98E-36    | 1.16E-34    |

|          |                                                                                                    |          |             |             |
|----------|----------------------------------------------------------------------------------------------------|----------|-------------|-------------|
| CACNB2   | calcium channel, voltage-dependent, beta 2 subunit                                                 | -3.40538 | 2.91E-34    | 1.00E-32    |
| CACNB3   | calcium channel, voltage-dependent, beta 3 subunit                                                 | -2.44416 | 2.08E-42    | 1.24E-40    |
| CACNB4   | calcium channel, voltage-dependent, beta 4 subunit                                                 | -2.86692 | 2.43E-27    | 5.55E-26    |
| CACNG1   | calcium channel, voltage-dependent, gamma subunit 1                                                | -0.44732 | 5.92E-05    | 1.76E-04    |
| CACNG2   | calcium channel, voltage-dependent, gamma subunit 2                                                | -1.52495 | 1.33E-36    | 5.53E-35    |
| CACNG3   | calcium channel, voltage-dependent, gamma subunit 3                                                | -5.70142 | 6.19E-95    | 6.29E-92    |
| CACNG4   | calcium channel, voltage-dependent, gamma subunit 4                                                | 0.04502  | 0.832053462 | 0.880106497 |
| CACNG5   | calcium channel, voltage-dependent, gamma subunit 5                                                | -0.20581 | 0.000565248 | 0.001423656 |
| CAD      | Carbamoyl-phosphate synthetase 2, aspartate transcarbamylase, and dihydroorotase                   | 1.19493  | 2.97E-12    | 2.37E-11    |
| CANT1    | calcium activated nucleotidase 1                                                                   | 0.67456  | 8.41E-06    | 2.89E-05    |
| CAT      | Catalase                                                                                           | 0.86945  | 5.50E-05    | 1.65E-04    |
| CATSPERB | cation channel, sperm-associated, beta                                                             | -0.01499 | 0.837716084 | 0.885175052 |
| CBR1     | carbonyl reductase 1                                                                               | 0.20264  | 0.536899074 | 0.626729349 |
| CBR3     | carbonyl reductase 3                                                                               | 0.44472  | 0.084912657 | 0.130481807 |
| CBR4     | carbonyl reductase 4                                                                               | 0.38704  | 0.058722336 | 0.094224553 |
| CBS      | cystathionine-beta-synthase                                                                        | 0.50929  | 0.099041096 | 0.148495554 |
| CCBL1    | cysteine conjugate-beta lyase; cytoplasmic (glutamine transaminase K, kynurenine aminotransferase) | -0.30648 | 0.069592139 | 0.109680345 |
| CCBL2    | cysteine conjugate-beta lyase 2                                                                    | 0.31566  | 0.087162535 | 0.133234161 |
| CDA      | cytidine deaminase                                                                                 | 0.35196  | 0.046381578 | 0.077037376 |
| CDADC1   | cytidine and dCMP deaminase domain containing 1                                                    | -0.15920 | 0.099045731 | 0.148495554 |
| CDIPT    | CDP-diacylglycerol--inositol 3-phosphatidyltransferase (phosphatidylinositol synthase)             | -0.20763 | 0.081214881 | 0.125845925 |
| CDO1     | cysteine dioxygenase, type I                                                                       | 0.21571  | 0.642021749 | 0.720723477 |
| CDS1     | CDP-diacylglycerol synthase (phosphatidate cytidyltransferase) 1                                   | -1.23975 | 1.44E-14    | 1.40E-13    |
| CDS2     | CDP-diacylglycerol synthase (phosphatidate cytidyltransferase) 2                                   | 0.55042  | 0.000526169 | 0.001333792 |
| CECR1    | cat eye syndrome chromosome region, candidate 1                                                    | 0.35128  | 0.339293759 | 0.430576911 |



|         |                                                                                                   |          |             |             |
|---------|---------------------------------------------------------------------------------------------------|----------|-------------|-------------|
| CEL     | carboxyl ester lipase (bile salt-stimulated lipase)                                               | 0.10341  | 0.523639828 | 0.613225674 |
| CEPT1   | choline/ethanolamine phosphotransferase 1                                                         | 0.70628  | 1.52E-07    | 6.87E-07    |
| CERK    | ceramide kinase                                                                                   | -0.58935 | 0.00124029  | 2.90E-03    |
| CES1    | carboxylesterase 1 (monocyte/macrophage serine esterase 1)                                        | 0.12683  | 0.775199513 | 0.833411216 |
| CES2    | carboxylesterase 2 (intestine, liver)                                                             | -0.23474 | 0.090001507 | 0.136955886 |
| CES3    | carboxylesterase 3 (brain)                                                                        | -0.30198 | 0.000504343 | 1.28E-03    |
| CFTR    | Cystic fibrosis transmembrane conductance regulator (ATP-binding cassette sub-family C, member 7) | -0.09566 | 0.080748378 | 0.125314086 |
| CH25H   | cholesterol 25-hydroxylase                                                                        | -0.96487 | 0.0473073   | 0.078299834 |
| CHAT    | choline acetyltransferase                                                                         | -0.01739 | 0.817272635 | 0.868085301 |
| CHI3L1  | chitinase 3-like 1 (cartilage glycoprotein-39)                                                    | 3.01506  | 8.08E-05    | 2.34E-04    |
| CHI3L2  | chitinase 3-like 2                                                                                | 3.64596  | 2.78E-08    | 1.41E-07    |
| CHIA    | chitinase, acidic                                                                                 | -0.17409 | 0.0508663   | 0.083127965 |
| CHIT1   | chitinase 1                                                                                       | -0.10241 | 0.671054076 | 0.744273288 |
| CHKA    | choline kinase alpha                                                                              | -0.24697 | 0.132877075 | 0.193232541 |
| CHPF    | chondroitin polymerizing factor                                                                   | 0.64314  | 0.001049934 | 2.48E-03    |
| CHPF2   | chondroitin sulfate glucuronyltransferase                                                         | 0.82116  | 2.23E-05    | 7.12E-05    |
| CHPT1   | choline phosphotransferase 1                                                                      | 0.31270  | 0.15229355  | 0.21575804  |
| CHRNA1  | Cholinergic receptor, nicotinic, alpha 1 (muscle)                                                 | 0.36250  | 0.161536706 | 0.226173639 |
| CHRNA10 | Cholinergic receptor, nicotinic, alpha 10                                                         | -0.00320 | 0.953963536 | 0.969219324 |
| CHRNA2  | Cholinergic receptor, nicotinic, alpha 2 (neuronal)                                               | -0.23502 | 0.003423202 | 0.007272068 |
| CHRNA3  | Cholinergic receptor, nicotinic, alpha 3                                                          | -0.49503 | 1.10E-08    | 5.81E-08    |
| CHRNA4  | Cholinergic receptor, nicotinic, alpha 4                                                          | -0.08133 | 0.148926879 | 0.212320017 |
| CHRNA5  | Cholinergic receptor, nicotinic, alpha 5                                                          | 0.20913  | 0.194274284 | 0.265429852 |
| CHRNA6  | Cholinergic receptor, nicotinic, alpha 6                                                          | -0.10569 | 0.192366114 | 0.263176521 |
| CHRNA9  | Cholinergic receptor, nicotinic, alpha 9                                                          | 1.32097  | 0.003295922 | 7.05E-03    |

|        |                                                             |          |             |             |
|--------|-------------------------------------------------------------|----------|-------------|-------------|
| CHRN1  | Cholinergic receptor, nicotinic, beta 1 (muscle)            | 0.37600  | 0.023811971 | 0.042501965 |
| CHRN2  | Cholinergic receptor, nicotinic, beta 2 (neuronal)          | 0.01913  | 0.831351099 | 0.879821335 |
| CHRN3  | Cholinergic receptor, nicotinic, beta 3                     | 0.07206  | 0.150469855 | 0.213770242 |
| CHRN4  | Cholinergic receptor, nicotinic, beta 4                     | -0.13219 | 0.010637687 | 0.020421546 |
| CHRND  | Cholinergic receptor, nicotinic, delta                      | -0.21544 | 0.000632045 | 0.00157084  |
| CHRNE  | Cholinergic receptor, nicotinic, epsilon                    | 0.04917  | 0.39166851  | 0.482290782 |
| CHRNG  | Cholinergic receptor, nicotinic, gamma                      | -0.00096 | 0.989345232 | 0.993744494 |
| CHST1  | carbohydrate (keratan sulfate Gal-6) sulfotransferase 1     | -3.00517 | 7.93E-20    | 1.10E-18    |
| CHST10 | carbohydrate sulfotransferase 10                            | -0.23679 | 0.244721234 | 0.326455557 |
| CHST11 | carbohydrate (chondroitin 4) sulfotransferase 11            | 0.68074  | 0.006215601 | 1.26E-02    |
| CHST12 | carbohydrate (chondroitin 4) sulfotransferase 12            | 0.64911  | 3.33E-05    | 1.03E-04    |
| CHST2  | carbohydrate (N-acetylglucosamine-6-O) sulfotransferase 2   | -0.12830 | 0.682390257 | 0.754260947 |
| CHST3  | carbohydrate (chondroitin 6) sulfotransferase 3             | 0.34397  | 0.155027531 | 0.218565166 |
| CHST4  | carbohydrate (N-acetylglucosamine 6-O) sulfotransferase 4   | 0.08718  | 0.456083051 | 0.548324567 |
| CHST5  | carbohydrate (N-acetylglucosamine 6-O) sulfotransferase 5   | -0.14525 | 0.073288592 | 0.114965824 |
| CHST7  | carbohydrate (N-acetylglucosamine 6-O) sulfotransferase 7   | 0.78138  | 0.018097247 | 0.033026664 |
| CHST8  | carbohydrate (N-acetylgalactosamine 4-O) sulfotransferase 8 | -0.14028 | 0.424969307 | 0.515490813 |
| CHSY1  | carbohydrate (chondroitin) synthase 1                       | 1.58782  | 2.13E-14    | 2.04E-13    |
| CKB    | creatine kinase, brain                                      | -1.18438 | 0.001222559 | 2.86E-03    |
| CKM    | creatine kinase, muscle                                     | -0.17965 | 0.013175687 | 0.024719081 |
| CKMT2  | creatine kinase, mitochondrial 2 (sarcomeric)               | -0.51794 | 0.007063691 | 0.014065116 |
| CLC    | Charcot-Leyden crystal protein                              | -0.22444 | 0.158728194 | 0.223163499 |
| CLCA1  | chloride channel calcium activated 1                        | 0.09609  | 0.284118568 | 0.369790685 |
| CLCA2  | chloride channel calcium activated 2                        | -0.00515 | 0.981999929 | 0.989299235 |
| CLCA4  | chloride channel calcium activated 4                        | -0.93291 | 2.92E-06    | 1.10E-05    |

|        |                                                           |          |             |             |
|--------|-----------------------------------------------------------|----------|-------------|-------------|
| CLCC1  | chloride channel CLIC-like 1                              | 0.82528  | 4.90E-11    | 3.47E-10    |
| CLCN1  | chloride channel 1                                        | -0.41435 | 2.48E-08    | 1.26E-07    |
| CLCN2  | chloride channel 2                                        | 0.22547  | 0.076705141 | 1.20E-01    |
| CLCN3  | chloride channel 3                                        | -0.04275 | 0.840704581 | 0.886939671 |
| CLCN4  | chloride channel 4-2                                      | -1.39724 | 9.71E-28    | 2.27E-26    |
| CLCN5  | chloride channel 5                                        | 0.05150  | 0.659347271 | 0.736512639 |
| CLCN6  | chloride channel 6                                        | -1.18163 | 2.98E-08    | 1.50E-07    |
| CLCN7  | chloride channel 7                                        | -0.20763 | 0.023627325 | 0.042246572 |
| CLCNKB | chloride channel Kb                                       | -0.23322 | 0.000591142 | 0.001480038 |
| CLIC1  | chloride intracellular channel 1                          | 2.27955  | 3.05E-16    | 3.37E-15    |
| CLIC2  | chloride intracellular channel 2                          | 0.50283  | 0.023528151 | 4.21E-02    |
| CLIC3  | chloride intracellular channel 3                          | 0.20176  | 0.391524117 | 0.482290782 |
| CLIC4  | chloride intracellular channel 4 (mitochondrial)          | 2.07129  | 2.15E-10    | 1.41E-09    |
| CLIC5  | chloride intracellular channel 5                          | -0.43757 | 0.064134039 | 0.102022302 |
| CMAS   | Cytidine monophosphate N-acetylneuraminic acid synthetase | -1.71620 | 2.05E-18    | 2.62E-17    |
| CNDP2  | CNDP dipeptidase 2 (metallopeptidase M20 family)          | 0.22802  | 0.111048588 | 0.16395191  |
| CNGA1  | cyclic nucleotide gated channel alpha 1                   | -0.11486 | 0.129759514 | 0.188969264 |
| CNGA3  | cyclic nucleotide gated channel alpha 3                   | 2.03139  | 5.87E-06    | 2.09E-05    |
| CNGB1  | cyclic nucleotide gated channel beta 1                    | -0.56777 | 3.08E-21    | 4.74E-20    |
| CNGB3  | cyclic nucleotide gated channel beta 3                    | -0.66834 | 3.02E-16    | 3.35E-15    |
| CNP    | 2',3'-cyclic nucleotide 3' phosphodiesterase              | -0.88305 | 0.000662415 | 1.64E-03    |
| COASY  | Coenzyme A synthase                                       | 0.00260  | 0.9840368   | 0.990132417 |
| COMT   | catechol-O-methyltransferase                              | 0.74200  | 3.86E-07    | 1.64E-06    |
| COQ10B | Coenzyme Q10 homolog B ( <i>S. cerevisiae</i> )           | -0.25050 | 0.089627632 | 0.136489121 |
| COQ2   | coenzyme Q2 homolog, prenyltransferase (yeast)            | 1.20049  | 2.40E-13    | 2.14E-12    |

|         |                                                                                           |          |             |             |
|---------|-------------------------------------------------------------------------------------------|----------|-------------|-------------|
| COQ3    | coenzyme Q3 homolog, methyltransferase ( <i>S. cerevisiae</i> )                           | -0.50703 | 0.001371557 | 0.003190361 |
| COQ4    | coenzyme Q4 homolog ( <i>S. cerevisiae</i> )                                              | 0.25755  | 0.053399887 | 0.086780152 |
| COQ6    | coenzyme Q6 homolog, monooxygenase ( <i>S. cerevisiae</i> )                               | -0.02054 | 0.884399108 | 0.920155265 |
| COQ7    | coenzyme Q7 homolog, ubiquinone (yeast)                                                   | 0.48754  | 0.004492562 | 0.009338833 |
| COQ9    | coenzyme Q9 homolog ( <i>S. cerevisiae</i> )                                              | 0.12126  | 0.476179484 | 0.568785482 |
| COX10   | COX10 homolog, cytochrome c oxidase assembly protein, heme A: farnesyltransferase (yeast) | -0.36810 | 0.001068876 | 2.52E-03    |
| COX11   | COX11 homolog, cytochrome c oxidase assembly protein (yeast)                              | -0.84040 | 1.70E-06    | 6.62E-06    |
| COX15   | COX15 homolog, cytochrome c oxidase assembly protein (yeast)                              | -0.03779 | 0.786029518 | 0.841393302 |
| COX16   | COX16 cytochrome c oxidase assembly homolog ( <i>S. cerevisiae</i> )                      | -0.25136 | 0.245011037 | 0.326627829 |
| COX17   | COX17 cytochrome c oxidase assembly homolog ( <i>S. cerevisiae</i> )                      | -0.16626 | 0.335795203 | 0.427203785 |
| COX4I1  | cytochrome c oxidase subunit IV isoform 1                                                 | -0.44020 | 0.000384397 | 9.99E-04    |
| COX5A   | cytochrome c oxidase subunit Va                                                           | -0.43732 | 0.000227794 | 6.17E-04    |
| COX5B   | Cytochrome c oxidase subunit Vb                                                           | -0.47915 | 0.00109302  | 0.002571887 |
| COX6A1  | cytochrome c oxidase subunit VIa polypeptide 1                                            | -0.55296 | 6.80E-06    | 2.38E-05    |
| COX6A2  | cytochrome c oxidase subunit VIa polypeptide 2                                            | -0.37005 | 0.000204329 | 0.000559087 |
| COX6B1  | cytochrome c oxidase subunit Vīb polypeptide 1 (ubiquitous)                               | -0.26464 | 0.031564638 | 0.054290109 |
| COX6C   | cytochrome c oxidase subunit VIc                                                          | -0.52207 | 9.20E-08    | 4.29E-07    |
| COX7A1  | cytochrome c oxidase subunit VIIa polypeptide 1 (muscle)                                  | -2.60210 | 6.75E-09    | 3.72E-08    |
| COX7A2  | cytochrome c oxidase subunit VIIa polypeptide 2 (liver)                                   | 0.05136  | 0.752089118 | 0.812863996 |
| COX7A2L | cytochrome c oxidase subunit VIIa polypeptide 2 like                                      | -0.58929 | 0.000231205 | 0.000624223 |
| COX7B   | cytochrome c oxidase subunit VIIb                                                         | 0.06625  | 0.682493178 | 0.754260947 |
| COX7C   | cytochrome c oxidase subunit VIIc                                                         | -0.26978 | 0.00109498  | 0.00257352  |
| COX8A   | cytochrome c oxidase subunit 8A (ubiquitous)                                              | 0.07303  | 0.514793554 | 0.606710316 |
| CP      | ceruloplasmin (ferroxidase)                                                               | 1.07013  | 0.000654832 | 1.62E-03    |
| CPOX    | coproporphyrinogen oxidase                                                                | 0.16201  | 0.306038264 | 0.394281237 |

|            |                                                         |          |             |             |
|------------|---------------------------------------------------------|----------|-------------|-------------|
| CPS1       | carbamoyl-phosphate synthetase 1, mitochondrial         | 0.54306  | 0.096949417 | 1.46E-01    |
| CPT1A      | carnitine palmitoyltransferase 1A (liver)               | -0.23147 | 0.009448497 | 0.018381621 |
| CPT2       | carnitine palmitoyltransferase II                       | 0.88991  | 9.48E-16    | 1.01E-14    |
| CRAT       | carnitine acetyltransferase                             | -0.23091 | 0.088120805 | 0.134597743 |
| CROT       | carnitine O-octanoyltransferase                         | 1.25620  | 3.97E-08    | 1.97E-07    |
| CRYL1      | crystallin, lambda 1                                    | 0.02561  | 0.922392027 | 0.94596999  |
| CRYM       | crystallin, mu                                          | -5.16424 | 5.39E-24    | 1.02E-22    |
| CRYZ       | crystallin, zeta (quinone reductase)                    | 1.12616  | 3.64E-06    | 1.34E-05    |
| CRYZL1     | crystallin, zeta (quinone reductase)-like 1             | -1.13996 | 3.95E-10    | 2.52E-09    |
| CS         | citrate synthase                                        | -0.37073 | 0.006923046 | 1.39E-02    |
| CSAD       | cysteine sulfinic acid decarboxylase                    | 0.31026  | 0.259832497 | 0.344354281 |
| CSGALNACT1 | chondroitin sulfate N-acetylgalactosaminyltransferase 1 | -1.28267 | 0.000191954 | 5.27E-04    |
| CSGALNACT2 | chondroitin sulfate N-acetylgalactosaminyltransferase 2 | 0.50890  | 0.003221073 | 0.006893096 |
| CTBS       | chitobiase, di-N-acetyl-                                | 1.38893  | 1.16E-08    | 6.07E-08    |
| CTH        | cystathionase (cystathionine gamma-lyase)               | 0.50069  | 0.026190796 | 4.63E-02    |
| CTNS       | Cystinosis, nephropathic                                | 0.84346  | 4.43E-08    | 2.17E-07    |
| CTPS2      | CTP synthase II                                         | 0.66351  | 1.19E-05    | 3.97E-05    |
| CUBN       | cubilin (intrinsic factor-cobalamin receptor)           | 0.12809  | 0.282793061 | 0.368739109 |
| CYB561     | cytochrome b-561                                        | -1.07715 | 7.36E-09    | 4.00E-08    |
| CYB5A      | cytochrome b5 type A (microsomal)                       | 0.73066  | 0.002960364 | 0.00638898  |
| CYB5B      | cytochrome b5 type B (outer mitochondrial membrane)     | 0.15115  | 0.366566622 | 0.458603042 |
| CYB5R1     | cytochrome b5 reductase 1                               | 0.01388  | 0.951273662 | 0.967453404 |
| CYB5R2     | cytochrome b5 reductase 2                               | -0.53525 | 0.100782018 | 0.150322702 |
| CYB5R3     | cytochrome b5 reductase 3                               | -0.14723 | 0.269706718 | 0.353875304 |
| CYB5R4     | cytochrome b5 reductase 4                               | 0.72403  | 0.000825146 | 2.00E-03    |

|         |                                                                    |          |             |             |
|---------|--------------------------------------------------------------------|----------|-------------|-------------|
| CYBA    | cytochrome b-245, alpha polypeptide                                | 1.59796  | 1.56E-07    | 7.04E-07    |
| CYBB    | cytochrome b-245, beta polypeptide (chronic granulomatous disease) | 1.15024  | 8.42E-05    | 2.43E-04    |
| CYBRD1  | cytochrome b reductase 1                                           | 2.04399  | 1.06E-09    | 6.53E-09    |
| CYC1    | cytochrome c-1                                                     | 0.09153  | 0.598145466 | 0.682956412 |
| CYCS    | cytochrome c, somatic                                              | -0.07457 | 0.565020334 | 0.653777085 |
| CYP11A1 | cytochrome P450, family 11, subfamily A, polypeptide 1             | -0.14962 | 0.133318855 | 0.193736406 |
| CYP11B1 | cytochrome P450, family 11, subfamily B, polypeptide 1             | -0.18406 | 0.000443127 | 0.00114035  |
| CYP11B2 | cytochrome P450, family 11, subfamily B, polypeptide 2             | -0.23649 | 0.001351072 | 0.003146311 |
| CYP17A1 | cytochrome P450, family 17, subfamily A, polypeptide 1             | -0.13321 | 0.168138606 | 0.233933255 |
| CYP19A1 | cytochrome P450, family 19, subfamily A, polypeptide 1             | 0.42977  | 0.023025281 | 0.04127901  |
| CYP1A1  | cytochrome P450, family 1, subfamily A, polypeptide 1              | -0.37840 | 4.12E-08    | 2.03E-07    |
| CYP1A2  | cytochrome P450, family 1, subfamily A, polypeptide 2              | 0.02119  | 0.790326919 | 0.844413769 |
| CYP1B1  | cytochrome P450, family 1, subfamily B, polypeptide 1              | -0.27507 | 0.596938973 | 0.682168034 |
| CYP20A1 | cytochrome P450, family 20, subfamily A, polypeptide 1             | 1.49212  | 9.98E-28    | 2.31E-26    |
| CYP21A2 | cytochrome P450, family 21, subfamily A, polypeptide 2             | -0.01735 | 0.839755531 | 0.886408616 |
| CYP24A1 | cytochrome P450, family 24, subfamily A, polypeptide 1             | 0.01494  | 0.910359368 | 0.939472384 |
| CYP26A1 | cytochrome P450, family 26, subfamily A, polypeptide 1             | -0.77213 | 0.000368022 | 0.000961682 |
| CYP26B1 | cytochrome P450, family 26, subfamily B, polypeptide 1             | -2.64829 | 2.31E-30    | 6.19E-29    |
| CYP27A1 | cytochrome P450, family 27, subfamily A, polypeptide 1             | 0.54806  | 0.005863255 | 1.19E-02    |
| CYP27B1 | cytochrome P450, family 27, subfamily B, polypeptide 1             | 0.52085  | 0.123664311 | 1.81E-01    |
| CYP2A13 | cytochrome P450, family 2, subfamily A, polypeptide 13             | -0.78746 | 3.94E-14    | 3.68E-13    |
| CYP2A6  | cytochrome P450, family 2, subfamily A, polypeptide 6              | -0.30091 | 4.96E-05    | 0.000149348 |
| CYP2A7  | cytochrome P450, family 2, subfamily A, polypeptide 7              | -0.29077 | 0.000331778 | 0.000875981 |
| CYP2B6  | cytochrome P450, family 2, subfamily B, polypeptide 6              | -0.14702 | 0.006946983 | 0.013873493 |
| CYP2C18 | cytochrome P450, family 2, subfamily C, polypeptide 18             | -0.27139 | 0.003688628 | 0.007797474 |

|         |                                                        |          |             |             |
|---------|--------------------------------------------------------|----------|-------------|-------------|
| CYP2C19 | cytochrome P450, family 2, subfamily C, polypeptide 19 | -0.18778 | 0.002003251 | 0.004485252 |
| CYP2C8  | cytochrome P450, family 2, subfamily C, polypeptide 8  | -0.18545 | 0.000968035 | 0.002307169 |
| CYP2C9  | Cytochrome P450, family 2, subfamily C, polypeptide 9  | -0.04688 | 0.303330944 | 0.391289219 |
| CYP2D6  | Cytochrome P450, family 2, subfamily D, polypeptide 6  | -0.13855 | 0.04242438  | 0.071162346 |
| CYP2E1  | cytochrome P450, family 2, subfamily E, polypeptide 1  | -0.57749 | 3.92E-12    | 3.07E-11    |
| CYP2F1  | cytochrome P450, family 2, subfamily F, polypeptide 1  | -0.11815 | 0.029798416 | 0.051777931 |
| CYP2J2  | cytochrome P450, family 2, subfamily J, polypeptide 2  | -0.93898 | 0.006940806 | 1.39E-02    |
| CYP2R1  | cytochrome P450, family 2, subfamily R, polypeptide 1  | 0.14485  | 0.106800067 | 0.158369465 |
| CYP2W1  | cytochrome P450, family 2, subfamily W, polypeptide 1  | -0.28178 | 2.86E-05    | 8.98E-05    |
| CYP39A1 | cytochrome P450, family 39, subfamily A, polypeptide 1 | 0.30224  | 0.189426197 | 2.60E-01    |
| CYP3A4  | Cytochrome P450, family 3, subfamily A, polypeptide 4  | -0.16597 | 0.003151116 | 0.006750495 |
| CYP3A43 | cytochrome P450, family 3, subfamily A, polypeptide 43 | -0.01627 | 0.667723235 | 0.74179308  |
| CYP3A5  | cytochrome P450, family 3, subfamily A, polypeptide 5  | 0.09685  | 0.484737847 | 0.57596262  |
| CYP3A7  | cytochrome P450, family 3, subfamily A, polypeptide 7  | -0.03438 | 0.705102096 | 0.774431422 |
| CYP46A1 | cytochrome P450, family 46, subfamily A, polypeptide 1 | -4.24774 | 2.89E-24    | 5.76E-23    |
| CYP4A11 | cytochrome P450, family 4, subfamily A, polypeptide 11 | -0.07933 | 0.149828002 | 0.213156283 |
| CYP4A22 | cytochrome P450, family 4, subfamily A, polypeptide 22 | -0.03784 | 0.375683501 | 0.467706404 |
| CYP4B1  | cytochrome P450, family 4, subfamily B, polypeptide 1  | -0.24979 | 0.36040582  | 0.45200804  |
| CYP4F11 | cytochrome P450, family 4, subfamily F, polypeptide 11 | 0.07686  | 0.606883174 | 0.68965539  |
| CYP4F12 | cytochrome P450, family 4, subfamily F, polypeptide 12 | -0.30400 | 0.005164051 | 0.010572523 |
| CYP4F2  | cytochrome P450, family 4, subfamily F, polypeptide 2  | -0.02666 | 0.858418846 | 0.899091878 |
| CYP4F3  | cytochrome P450, family 4, subfamily F, polypeptide 3  | 0.15164  | 0.642418724 | 0.720771118 |
| CYP4F8  | cytochrome P450, family 4, subfamily F, polypeptide 8  | -0.21446 | 0.000770324 | 0.001875531 |
| CYP51A1 | cytochrome P450, family 51, subfamily A, polypeptide 1 | 0.22303  | 0.262250722 | 0.347106587 |
| CYP7A1  | cytochrome P450, family 7, subfamily A, polypeptide 1  | -0.02671 | 0.587960546 | 0.67570593  |

|        |                                                                                 |          |             |             |
|--------|---------------------------------------------------------------------------------|----------|-------------|-------------|
| CYP7B1 | cytochrome P450, family 7, subfamily B, polypeptide 1                           | -0.32173 | 0.024798889 | 0.044070054 |
| DAD1   | defender against cell death                                                     | 0.63155  | 1.92E-05    | 6.20E-05    |
| DAGLA  | diacylglycerol lipase, alpha                                                    | -0.65891 | 1.86E-10    | 1.23E-09    |
| DAK    | dihydroxyacetone kinase 2 homolog ( <i>S. cerevisiae</i> )                      | -0.30300 | 0.004875941 | 0.010053537 |
| DAO    | D-amino-acid oxidase                                                            | -0.01363 | 0.908780424 | 0.938319249 |
| DBH    | dopamine beta-hydroxylase (dopamine beta-monoxygenase)                          | -0.16869 | 0.009440008 | 0.018381621 |
| DBT    | dihydrolipoamide branched chain transacylase E2                                 | 0.21710  | 0.104755154 | 0.155791681 |
| DCK    | deoxycytidine kinase                                                            | 0.25105  | 0.186183664 | 0.255883852 |
| DCT    | dopachrome tautomerase (dopachrome delta-isomerase, tyrosine-related protein 2) | 0.25166  | 0.253776859 | 3.37E-01    |
| DCTD   | dCMP deaminase                                                                  | 0.53395  | 0.006475125 | 1.31E-02    |
| DCXR   | dicarbonyl/L-xylulose reductase                                                 | -0.43104 | 0.014146168 | 0.026336226 |
| DDAH1  | dimethylarginine dimethylaminohydrolase 1                                       | -0.94256 | 0.00057733  | 1.45E-03    |
| DDAH2  | dimethylarginine dimethylaminohydrolase 2                                       | 0.84733  | 3.81E-06    | 1.40E-05    |
| DDC    | dopa decarboxylase (aromatic L-amino acid decarboxylase)                        | -0.07526 | 0.543605309 | 0.632960821 |
| DDHD2  | DDHD domain containing 2                                                        | -1.71964 | 2.89E-19    | 3.90E-18    |
| DDO    | D-aspartate oxidase                                                             | 0.37228  | 0.001999324 | 0.004481395 |
| DDOST  | dolichyl-diphosphooligosaccharide-protein glycosyltransferase                   | 1.05124  | 2.44E-14    | 2.29E-13    |
| DDT    | D-dopachrome tautomerase                                                        | -0.13198 | 0.459995932 | 0.551690981 |
| DECR1  | 2,4-dienoyl CoA reductase 1, mitochondrial                                      | 0.88696  | 8.03E-12    | 6.12E-11    |
| DECR2  | 2,4-dienoyl CoA reductase 2, peroxisomal                                        | 0.22823  | 0.096602447 | 0.14547613  |
| DEGS1  | degenerative spermatocyte homolog 1, lipid desaturase ( <i>Drosophila</i> )     | 0.70006  | 1.81E-07    | 8.14E-07    |
| DERA   | 2-deoxyribose-5-phosphate aldolase homolog ( <i>C. elegans</i> )                | 1.63236  | 7.79E-19    | 1.02E-17    |
| DGAT1  | diacylglycerol O-acyltransferase homolog 1 (mouse)                              | -0.30716 | 0.025749971 | 0.045680358 |
| DGKA   | diacylglycerol kinase, alpha 80kDa                                              | -0.46019 | 5.97E-05    | 1.77E-04    |
| DGKB   | diacylglycerol kinase, beta 90kDa                                               | -2.68422 | 1.39E-13    | 1.25E-12    |



|        |                                                                                       |          |             |             |
|--------|---------------------------------------------------------------------------------------|----------|-------------|-------------|
| DGKD   | diacylglycerol kinase, delta 130kDa                                                   | 0.20595  | 0.213005713 | 0.289056113 |
| DGKE   | diacylglycerol kinase, epsilon 64kDa                                                  | -0.26065 | 9.45E-05    | 0.00027147  |
| DGKG   | diacylglycerol kinase, gamma 90kDa                                                    | -0.42222 | 0.125331378 | 0.183202136 |
| DGKI   | diacylglycerol kinase, iota                                                           | -1.38808 | 8.71E-08    | 4.09E-07    |
| DGKQ   | diacylglycerol kinase, theta 110kDa                                                   | -0.06678 | 0.48299496  | 0.574899739 |
| DGKZ   | diacylglycerol kinase, zeta 104kDa                                                    | -2.57525 | 9.72E-39    | 4.59E-37    |
| DGUOK  | deoxyguanosine kinase                                                                 | 0.24166  | 0.128263138 | 0.186923986 |
| DHCR24 | 24-dehydrocholesterol reductase                                                       | -1.81612 | 1.92E-06    | 7.45E-06    |
| DHCR7  | 7-dehydrocholesterol reductase                                                        | -0.19742 | 0.385575335 | 0.476230889 |
| DHDDS  | dehydrodolicyl diphosphate synthase                                                   | -0.54488 | 5.80E-06    | 2.06E-05    |
| DHFR   | dihydrofolate reductase                                                               | 1.88222  | 1.55E-15    | 1.58E-14    |
| DHODH  | dihydroorotate dehydrogenase                                                          | 0.42592  | 9.65E-08    | 4.48E-07    |
| DHRS1  | dehydrogenase/reductase (SDR family) member 1                                         | 0.31286  | 0.095403777 | 0.143928648 |
| DHRS11 | dehydrogenase/reductase (SDR family) member 11                                        | -0.97829 | 4.81E-08    | 2.34E-07    |
| DHRS12 | dehydrogenase/reductase (SDR family) member 12                                        | -0.08515 | 0.320996571 | 0.41068976  |
| DHRS2  | dehydrogenase/reductase (SDR family) member 2                                         | -0.17246 | 0.351815818 | 0.443698237 |
| DHRS3  | dehydrogenase/reductase (SDR family) member 3                                         | 0.68148  | 0.012712686 | 0.02396391  |
| DHRS7  | dehydrogenase/reductase (SDR family) member 7                                         | -0.05682 | 0.625009572 | 0.70474326  |
| DHRS7B | dehydrogenase/reductase (SDR family) member 7B                                        | 0.20490  | 0.16736675  | 0.233052468 |
| DHRS9  | dehydrogenase/reductase (SDR family) member 9                                         | -1.63032 | 1.81E-06    | 7.02E-06    |
| DHTKD1 | dehydrogenase E1 and transketolase domain containing 1                                | 0.50673  | 0.002715289 | 0.005916595 |
| DIO1   | deiodinase, iodothyronine, type I                                                     | -0.13578 | 0.100454234 | 0.150164307 |
| DIO2   | deiodinase, iodothyronine, type II                                                    | -2.05630 | 8.91E-15    | 8.75E-14    |
| DIO3   | deiodinase, iodothyronine, type III                                                   | -0.16006 | 0.072898701 | 0.114442516 |
| DLAT   | dihydrolipoamide S-acetyltransferase (E2 component of pyruvate dehydrogenase complex) | -0.00670 | 0.957978223 | 0.971303447 |

|        |                                                                                                               |          |             |             |
|--------|---------------------------------------------------------------------------------------------------------------|----------|-------------|-------------|
| DLD    | dihydrolipoamide dehydrogenase                                                                                | 0.28575  | 0.046490631 | 7.72E-02    |
| DOLK   | dolichol kinase                                                                                               | 0.48483  | 0.002335103 | 0.005171312 |
| DOLPP1 | dolichyl pyrophosphate phosphatase 1                                                                          | 0.28236  | 0.031393987 | 0.054133992 |
| DPAGT1 | dolichyl-phosphate (UDP-N-acetylglucosamine) N-acetylglucosaminephosphotransferase 1 (GlcNAc-1-P transferase) | 0.43151  | 0.004978564 | 0.010223657 |
| DPEP1  | dipeptidase 1 (renal)                                                                                         | 0.32430  | 0.088656268 | 0.135313959 |
| DPEP2  | dipeptidase 2                                                                                                 | 0.32095  | 0.051419205 | 0.083896664 |
| DPEP3  | dipeptidase 3                                                                                                 | -0.26742 | 0.025838883 | 0.045798126 |
| DPM1   | dolichyl-phosphate mannosyltransferase polypeptide 1, catalytic subunit                                       | 0.60057  | 8.04E-05    | 2.34E-04    |
| DPM2   | dolichyl-phosphate mannosyltransferase polypeptide 2, regulatory subunit                                      | 0.39177  | 0.011733681 | 0.022293994 |
| DPM3   | dolichyl-phosphate mannosyltransferase polypeptide 3                                                          | 0.90154  | 0.000327881 | 0.000866816 |
| DPYD   | dihydropyrimidine dehydrogenase                                                                               | 3.34244  | 4.46E-14    | 4.14E-13    |
| DPYS   | dihydropyrimidinase                                                                                           | -0.28963 | 0.000109665 | 0.000312254 |
| DPYSL2 | dihydropyrimidinase-like 2                                                                                    | -0.52219 | 0.057392728 | 9.25E-02    |
| DPYSL3 | dihydropyrimidinase-like 3                                                                                    | 2.05704  | 1.99E-09    | 1.18E-08    |
| DPYSL4 | dihydropyrimidinase-like 4                                                                                    | -0.17308 | 0.085071182 | 0.130580203 |
| DSE    | dermatan sulfate epimerase                                                                                    | 2.10256  | 5.86E-10    | 3.69E-09    |
| DTYMK  | deoxythymidylate kinase (thymidylate kinase)                                                                  | 2.04475  | 2.41E-17    | 2.81E-16    |
| DUOX1  | dual oxidase 1                                                                                                | -0.11129 | 0.33917574  | 0.430576911 |
| DUOX2  | dual oxidase 2                                                                                                | -0.10511 | 0.093051045 | 0.140858357 |
| DUT    | deoxyuridine triphosphatase                                                                                   | 0.43038  | 0.001467498 | 0.0033711   |
| EBP    | emopamil binding protein (sterol isomerase)                                                                   | -0.28919 | 0.243562696 | 0.325337031 |
| ECH1   | enoyl Coenzyme A hydratase 1, peroxisomal                                                                     | 0.13658  | 0.288874506 | 0.374781028 |
| ECHDC1 | enoyl Coenzyme A hydratase domain containing 1                                                                | 0.22512  | 0.130408997 | 0.189779164 |
| ECHDC2 | enoyl Coenzyme A hydratase domain containing 2                                                                | -0.03100 | 0.926648225 | 0.948100574 |
| ECHDC3 | enoyl Coenzyme A hydratase domain containing 3                                                                | -0.07770 | 0.717505361 | 0.784241074 |

|        |                                                                                                |          |             |             |
|--------|------------------------------------------------------------------------------------------------|----------|-------------|-------------|
| ECHS1  | enoyl Coenzyme A hydratase, short chain, 1, mitochondrial                                      | -0.63027 | 1.20E-06    | 4.80E-06    |
| EDEM1  | ER degradation enhancer, mannosidase alpha-like 1                                              | 0.12360  | 0.488181268 | 0.579376834 |
| EDEM2  | ER degradation enhancer, mannosidase alpha-like 2                                              | 1.43875  | 7.58E-13    | 6.40E-12    |
| EDEM3  | ER degradation enhancer, mannosidase alpha-like 3                                              | 0.47194  | 0.000441014 | 1.14E-03    |
| EHHADH | enoyl-Coenzyme A, hydratase/3-hydroxyacyl Coenzyme A dehydrogenase                             | 0.23339  | 0.251798421 | 0.334579209 |
| ELOVL1 | elongation of very long chain fatty acids (FEN1/Elo2, SUR4/Elo3, yeast)-like 1                 | 0.63737  | 0.000268977 | 0.000718567 |
| ELOVL2 | elongation of very long chain fatty acids (FEN1/Elo2, SUR4/Elo3, yeast)-like 2                 | 0.97798  | 0.043995546 | 7.35E-02    |
| ELOVL4 | elongation of very long chain fatty acids (FEN1/Elo2, SUR4/Elo3, yeast)-like 4                 | -2.50790 | 7.02E-24    | 1.31E-22    |
| ELOVL5 | ELOVL family member 5, elongation of long chain fatty acids (FEN1/Elo2, SUR4/Elo3-like, yeast) | -0.10748 | 0.385576018 | 0.476230889 |
| ELOVL6 | ELOVL family member 6, elongation of long chain fatty acids (FEN1/Elo2, SUR4/Elo3-like, yeast) | 0.57577  | 0.003069113 | 6.60E-03    |
| ENO1   | enolase 1, (alpha)                                                                             | 0.41252  | 0.093903562 | 1.42E-01    |
| ENO2   | enolase 2 (gamma, neuronal)                                                                    | -2.30847 | 7.25E-12    | 5.56E-11    |
| ENO3   | enolase 3 (beta, muscle)                                                                       | 0.36599  | 0.009954952 | 0.019256345 |
| ENOPH1 | enolase-phosphatase 1                                                                          | -0.08059 | 0.600029325 | 0.684161312 |
| ENOSF1 | enolase superfamily member 1                                                                   | 0.32107  | 0.326163462 | 0.416514019 |
| ENOX1  | ecto-NOX disulfide-thiol exchanger 1                                                           | -0.77527 | 9.79E-05    | 2.80E-04    |
| ENOX2  | ecto-NOX disulfide-thiol exchanger 2                                                           | 0.24031  | 0.00311408  | 0.006678189 |
| ENPP1  | ectonucleotide pyrophosphatase/phosphodiesterase 1                                             | 0.07724  | 0.404157393 | 0.495568142 |
| ENPP2  | ectonucleotide pyrophosphatase/phosphodiesterase 2 (autotaxin)                                 | -2.35813 | 8.82E-06    | 3.00E-05    |
| ENPP3  | ectonucleotide pyrophosphatase/phosphodiesterase 3                                             | -0.20053 | 0.000557646 | 0.001408316 |
| ENPP4  | ectonucleotide pyrophosphatase/phosphodiesterase 4 (putative function)                         | -0.96194 | 0.012418786 | 2.35E-02    |
| ENTPD1 | ectonucleoside triphosphate diphosphohydrolase 1                                               | 1.76709  | 6.11E-11    | 4.31E-10    |
| ENTPD2 | ectonucleoside triphosphate diphosphohydrolase 2                                               | -0.18859 | 0.006202626 | 0.012547203 |
| ENTPD3 | ectonucleoside triphosphate diphosphohydrolase 3                                               | -3.33805 | 3.58E-31    | 1.04E-29    |
| ENTPD4 | ectonucleoside triphosphate diphosphohydrolase 4                                               | -1.01593 | 5.64E-14    | 5.16E-13    |

|        |                                                                          |          |             |             |
|--------|--------------------------------------------------------------------------|----------|-------------|-------------|
| ENTPD5 | ectonucleoside triphosphate diphosphohydrolase 5                         | 0.27988  | 0.029896064 | 0.051903243 |
| ENTPD6 | ectonucleoside triphosphate diphosphohydrolase 6 (putative function)     | -1.88569 | 8.77E-29    | 2.15E-27    |
| ENTPD7 | ectonucleoside triphosphate diphosphohydrolase 7                         | 0.15580  | 0.159361524 | 0.223899086 |
| EPHX1  | epoxide hydrolase 1, microsomal (xenobiotic)                             | -0.83763 | 0.004813846 | 9.95E-03    |
| EPHX2  | epoxide hydrolase 2, cytoplasmic                                         | -0.20804 | 0.336276885 | 0.427549036 |
| EPX    | eosinophil peroxidase                                                    | -0.18167 | 0.007314686 | 0.014550642 |
| ESD    | esterase D/formylglutathione hydrolase                                   | 0.12512  | 0.355188557 | 0.447396739 |
| ETFA   | electron-transfer-flavoprotein, alpha polypeptide (glutaric aciduria II) | 0.59175  | 0.000837241 | 2.02E-03    |
| ETFB   | electron-transfer-flavoprotein, beta polypeptide                         | -0.38884 | 0.032165499 | 5.51E-02    |
| ETFDH  | electron-transferring-flavoprotein dehydrogenase                         | 0.09773  | 0.494705242 | 0.585751751 |
| ETNK1  | ethanolamine kinase 1                                                    | 0.70754  | 0.000664197 | 0.00164072  |
| ETNK2  | ethanolamine kinase 2                                                    | 0.07114  | 0.722687402 | 0.787758773 |
| EXT1   | exostoses (multiple) 1                                                   | -0.09357 | 0.51821301  | 0.607920975 |
| EXT2   | exostoses (multiple) 2                                                   | 0.56228  | 2.52E-05    | 8.01E-05    |
| EXTL1  | exostoses (multiple)-like 1                                              | -0.99316 | 3.10E-26    | 6.77E-25    |
| EXTL2  | exostoses (multiple)-like 2                                              | -0.05479 | 0.721363825 | 0.786766446 |
| EXTL3  | exostoses (multiple)-like 3                                              | -0.07514 | 0.6736494   | 0.746337455 |
| FA2H   | fatty acid 2-hydroxylase                                                 | -2.00749 | 2.77E-06    | 1.05E-05    |
| FAAH   | fatty acid amide hydrolase                                               | -1.58234 | 1.67E-30    | 4.60E-29    |
| FADS1  | fatty acid desaturase 1                                                  | -0.07781 | 0.733969454 | 0.797946471 |
| FADS2  | fatty acid desaturase 2                                                  | 0.37232  | 0.149610987 | 0.212996595 |
| FADS3  | fatty acid desaturase 3                                                  | -0.49864 | 0.007601157 | 1.50E-02    |
| FAH    | fumarylacetoacetate hydrolase (fumarylacetoacetase)                      | 0.72121  | 0.001872036 | 4.22E-03    |
| FAHD2A | fumarylacetoacetate hydrolase domain containing 2A                       | -0.31748 | 0.048368    | 0.079685692 |
| FAR2   | fatty acyl CoA reductase 2                                               | -1.00162 | 9.09E-05    | 2.62E-04    |

|         |                                                                                                                           |          |             |             |
|---------|---------------------------------------------------------------------------------------------------------------------------|----------|-------------|-------------|
| FASN    | fatty acid synthase                                                                                                       | -0.71769 | 1.21E-09    | 7.36E-09    |
| FBP1    | fructose-1,6-bisphosphatase 1                                                                                             | 0.63232  | 0.018924902 | 0.034475203 |
| FBP2    | fructose-1,6-bisphosphatase 2                                                                                             | -0.14842 | 0.057165717 | 0.092309693 |
| FDFT1   | farnesyl-diphosphate farnesyltransferase 1                                                                                | -0.92634 | 1.38E-06    | 5.47E-06    |
| FDPS    | farnesyl diphosphate synthase (farnesyl pyrophosphate synthetase, dimethylallyltranstransferase, geranyltranstransferase) | 0.12700  | 0.267973483 | 0.352843323 |
| FDX1    | ferredoxin 1                                                                                                              | 0.85766  | 1.48E-09    | 8.95E-09    |
| FDXR    | ferredoxin reductase                                                                                                      | 0.90520  | 8.66E-06    | 2.96E-05    |
| FECH    | ferrochelatase (protoporphyrin)                                                                                           | 0.00352  | 0.98083412  | 0.988614658 |
| FH      | fumarate hydratase                                                                                                        | 0.01953  | 0.908686309 | 0.938319249 |
| FHIT    | Fragile histidine triad gene                                                                                              | -0.70440 | 0.000253292 | 0.000681142 |
| FIG4    | FIG4 homolog ( <i>S. cerevisiae</i> )                                                                                     | -1.31146 | 6.76E-16    | 7.31E-15    |
| FLAD1   | FAD1 flavin adenine dinucleotide synthetase homolog ( <i>S. cerevisiae</i> )                                              | 0.72245  | 4.91E-06    | 1.76E-05    |
| FLVCR2  | Feline leukemia virus subgroup C cellular receptor family, member 2                                                       | 0.98463  | 9.98E-09    | 5.31E-08    |
| FMO1    | flavin containing monooxygenase 1                                                                                         | 0.09297  | 0.727324991 | 0.791569436 |
| FMO2    | flavin containing monooxygenase 2                                                                                         | -0.00286 | 0.993670898 | 0.995393773 |
| FMO3    | flavin containing monooxygenase 3                                                                                         | 0.26092  | 0.269155332 | 3.54E-01    |
| FMO4    | flavin containing monooxygenase 4                                                                                         | 0.40512  | 0.020342406 | 3.67E-02    |
| FMO5    | flavin containing monooxygenase 5                                                                                         | 0.05599  | 0.615906972 | 0.697182001 |
| FN3K    | fructosamine 3 kinase                                                                                                     | -0.15988 | 0.003362678 | 0.007165958 |
| FN3KRP  | fructosamine-3-kinase-related protein                                                                                     | -0.37990 | 0.000483271 | 0.001235837 |
| FOLH1   | folate hydrolase (prostate-specific membrane antigen) 1                                                                   | -0.83519 | 0.001775479 | 0.004019543 |
| FOLR1   | folate receptor 1 (adult)                                                                                                 | 0.05946  | 0.791385387 | 0.845003409 |
| FOLR2   | folate receptor 2 (fetal)                                                                                                 | 0.33703  | 0.386141769 | 0.476640083 |
| FOLR3   | folate receptor 3 (gamma)                                                                                                 | 0.00693  | 0.938602607 | 0.958089295 |
| FOXRED2 | FAD-dependent oxidoreductase domain containing 2                                                                          | -0.90490 | 1.16E-08    | 6.07E-08    |

|        |                                                                                 |          |             |             |
|--------|---------------------------------------------------------------------------------|----------|-------------|-------------|
| FPGS   | folylpolyglutamate synthase                                                     | 0.15007  | 0.165771662 | 0.231465515 |
| FPGT   | fucose-1-phosphate guanylyltransferase                                          | 1.86765  | 4.40E-22    | 7.27E-21    |
| FTCD   | formiminotransferase cyclodeaminase                                             | -0.33882 | 3.46E-06    | 1.29E-05    |
| FUCA1  | fucosidase, alpha-L- 1, tissue                                                  | 0.29843  | 0.263648793 | 3.48E-01    |
| FUT1   | fucosyltransferase 1 (galactoside 2-alpha-L-fucosyltransferase, H blood group)  | -0.88285 | 6.35E-12    | 4.89E-11    |
| FUT2   | fucosyltransferase 2 (secretor status included)                                 | -0.08746 | 0.312523698 | 0.402127012 |
| FUT3   | fucosyltransferase 3 (galactoside 3(4)-L-fucosyltransferase, Lewis blood group) | -0.25170 | 0.001453685 | 3.35E-03    |
| FUT4   | fucosyltransferase 4 (alpha (1,3) fucosyltransferase, myeloid-specific)         | 0.36183  | 0.001415123 | 3.27E-03    |
| FUT5   | fucosyltransferase 5 (alpha (1,3) fucosyltransferase)                           | 0.09827  | 0.219199041 | 0.296494777 |
| FUT6   | Fucosyltransferase 6 (alpha (1,3) fucosyltransferase)                           | -0.05676 | 0.351460877 | 0.44360354  |
| FUT7   | fucosyltransferase 7 (alpha (1,3) fucosyltransferase)                           | -0.28453 | 8.69E-06    | 2.97E-05    |
| FUT8   | fucosyltransferase 8 (alpha (1,6) fucosyltransferase)                           | 0.19943  | 0.369742215 | 0.46172354  |
| FUT9   | fucosyltransferase 9 (alpha (1,3) fucosyltransferase)                           | -0.62272 | 2.11E-21    | 3.30E-20    |
| FXN    | frataxin                                                                        | 0.28488  | 0.057905974 | 0.093061538 |
| G6PC   | glucose-6-phosphatase, catalytic subunit                                        | -0.14414 | 0.003984135 | 0.008367508 |
| G6PC2  | glucose-6-phosphatase, catalytic, 2                                             | 0.03900  | 0.56422271  | 0.653225951 |
| G6PC3  | glucose 6 phosphatase, catalytic, 3                                             | 0.72508  | 2.95E-05    | 9.27E-05    |
| G6PD   | glucose-6-phosphate dehydrogenase                                               | 0.13056  | 0.529274221 | 0.619110754 |
| GAA    | glucosidase, alpha; acid (Pompe disease, glycogen storage disease type II)      | 1.18627  | 5.88E-10    | 3.69E-09    |
| GABRA1 | Gamma-aminobutyric acid (GABA) A receptor, alpha 1                              | -5.66710 | 1.46E-36    | 5.94E-35    |
| GABRA2 | Gamma-aminobutyric acid (GABA) A receptor, alpha 2                              | -4.27750 | 5.71E-31    | 1.63E-29    |
| GABRA3 | Gamma-aminobutyric acid (GABA) A receptor, alpha 3                              | -2.18568 | 2.71E-23    | 4.92E-22    |
| GABRA4 | Gamma-aminobutyric acid (GABA) A receptor, alpha 4                              | -2.62901 | 3.80E-44    | 2.57E-42    |
| GABRA5 | Gamma-aminobutyric acid (GABA) A receptor, alpha 5                              | -1.74617 | 2.40E-79    | 4.43E-77    |
| GABRA6 | Gamma-aminobutyric acid (GABA) A receptor, alpha 6                              | -0.00772 | 0.923635234 | 0.94596999  |

|         |                                                                                                  |          |             |             |
|---------|--------------------------------------------------------------------------------------------------|----------|-------------|-------------|
| GABRB1  | Gamma-aminobutyric acid (GABA) A receptor, beta 1                                                | -3.77312 | 3.95E-09    | 2.27E-08    |
| GABRB2  | Gamma-aminobutyric acid (GABA) A receptor, beta 2                                                | -1.19893 | 2.98E-33    | 9.62E-32    |
| GABRB3  | Gamma-aminobutyric acid (GABA) A receptor, beta 3                                                | -2.23651 | 2.11E-41    | 1.23E-39    |
| GABRD   | Gamma-aminobutyric acid (GABA) A receptor, delta                                                 | -2.01095 | 2.53E-66    | 3.43E-64    |
| GABRE   | Gamma-aminobutyric acid (GABA) A receptor, epsilon                                               | -0.18954 | 0.467323523 | 0.559522215 |
| GABRG2  | Gamma-aminobutyric acid (GABA) A receptor, gamma 2                                               | -4.55138 | 1.26E-62    | 1.42E-60    |
| GABRG3  | Gamma-aminobutyric acid (GABA) A receptor, gamma 3                                               | -0.33788 | 1.94E-08    | 9.97E-08    |
| GABRP   | Gamma-aminobutyric acid (GABA) A receptor, pi                                                    | 0.00314  | 0.985969041 | 0.991332869 |
| GABRQ   | Gamma-aminobutyric acid (GABA) receptor, theta                                                   | -0.07484 | 0.245588932 | 0.327183682 |
| GABRR1  | Gamma-aminobutyric acid (GABA) receptor, rho 1                                                   | 0.02524  | 0.861441871 | 0.900880311 |
| GABRR2  | Gamma-aminobutyric acid (GABA) receptor, rho 2                                                   | -0.36773 | 3.59E-06    | 1.33E-05    |
| GAD1    | glutamate decarboxylase 1 (brain, 67kDa)                                                         | -0.39226 | 0.157634144 | 0.221932282 |
| GAD2    | Glutamate decarboxylase 2 (pancreatic islets and brain, 65kDa)                                   | -1.26881 | 9.92E-43    | 6.11E-41    |
| GAL3ST1 | galactose-3-O-sulfotransferase 1                                                                 | -0.36262 | 0.153325897 | 0.216767419 |
| GAL3ST4 | galactose-3-O-sulfotransferase 4                                                                 | 1.36568  | 4.33E-11    | 3.09E-10    |
| GALC    | galactosylceramidase                                                                             | 0.06995  | 0.718920995 | 0.785366138 |
| GALE    | UDP-galactose-4-epimerase                                                                        | 0.29311  | 0.028580835 | 0.050133596 |
| GALK1   | galactokinase 1                                                                                  | 0.33587  | 0.004377886 | 9.12E-03    |
| GALK2   | galactokinase 2                                                                                  | 0.00063  | 0.996810823 | 0.996810823 |
| GALNS   | galactosamine (N-acetyl)-6-sulfate sulfatase (Morquio syndrome, mucopolysaccharidosis type IVA)  | 0.49965  | 0.002586868 | 5.68E-03    |
| GALNT1  | UDP-N-acetyl-alpha-D-galactosamine:polypeptide N-acetylgalactosaminyltransferase 1 (GalNAc-T1)   | 1.51217  | 4.34E-23    | 7.74E-22    |
| GALNT10 | UDP-N-acetyl-alpha-D-galactosamine:polypeptide N-acetylgalactosaminyltransferase 10 (GalNAc-T10) | 1.51751  | 8.34E-08    | 3.94E-07    |
| GALNT11 | UDP-N-acetyl-alpha-D-galactosamine:polypeptide N-acetylgalactosaminyltransferase 11 (GalNAc-T11) | -0.84623 | 3.60E-07    | 1.54E-06    |
| GALNT12 | UDP-N-acetyl-alpha-D-galactosamine:polypeptide N-acetylgalactosaminyltransferase 12 (GalNAc-T12) | 0.30600  | 0.228244439 | 0.30704973  |
| GALNT14 | UDP-N-acetyl-alpha-D-galactosamine:polypeptide N-acetylgalactosaminyltransferase 14 (GalNAc-T14) | -1.83610 | 1.05E-12    | 8.74E-12    |

|        |                                                                                                                            |          |             |             |
|--------|----------------------------------------------------------------------------------------------------------------------------|----------|-------------|-------------|
| GALNT2 | UDP-N-acetyl-alpha-D-galactosamine:polypeptide N-acetylgalactosaminyltransferase 2 (GalNAc-T2)                             | 0.98466  | 2.06E-06    | 7.95E-06    |
| GALNT3 | UDP-N-acetyl-alpha-D-galactosamine:polypeptide N-acetylgalactosaminyltransferase 3 (GalNAc-T3)                             | 0.30932  | 0.140136654 | 0.20191199  |
| GALNT6 | UDP-N-acetyl-alpha-D-galactosamine:polypeptide N-acetylgalactosaminyltransferase 6 (GalNAc-T6)                             | 0.08265  | 0.725689051 | 0.790212019 |
| GALNT7 | UDP-N-acetyl-alpha-D-galactosamine:polypeptide N-acetylgalactosaminyltransferase 7 (GalNAc-T7)                             | 0.93972  | 1.66E-06    | 6.49E-06    |
| GALNT8 | UDP-N-acetyl-alpha-D-galactosamine:polypeptide N-acetylgalactosaminyltransferase 8 (GalNAc-T8)                             | -0.21829 | 0.006180156 | 0.012514199 |
| GALT   | galactose-1-phosphate uridylyltransferase                                                                                  | -0.62272 | 0.000100764 | 0.00028812  |
| GAMT   | guanidinoacetate N-methyltransferase                                                                                       | -0.29586 | 0.073486171 | 0.115180946 |
| GANAB  | glucosidase, alpha; neutral AB                                                                                             | 1.21064  | 1.17E-12    | 9.69E-12    |
| GAPDH  | glyceraldehyde-3-phosphate dehydrogenase                                                                                   | 0.15431  | 0.185901164 | 0.255849414 |
| GAPDHS | glyceraldehyde-3-phosphate dehydrogenase, spermatogenic                                                                    | -0.25934 | 4.18E-05    | 0.000126953 |
| GART   | phosphoribosylglycinamide formyltransferase, phosphoribosylglycinamide synthetase, phosphoribosylaminoimidazole synthetase | 0.89957  | 9.75E-10    | 6.01E-09    |
| GATM   | glycine amidinotransferase (L-arginine:glycine amidinotransferase)                                                         | 1.06838  | 0.018008849 | 3.29E-02    |
| GBA3   | glucosidase, beta, acid 3 (cytosolic)                                                                                      | -0.04625 | 0.593973366 | 0.680258573 |
| GBE1   | glucan (1,4-alpha-), branching enzyme 1 (glycogen branching enzyme, Andersen disease, glycogen storage disease type IV)    | 2.17123  | 8.52E-22    | 1.37E-20    |
| GCAT   | glycine C-acetyltransferase (2-amino-3-ketobutyrate coenzyme A ligase)                                                     | -0.09922 | 0.603173713 | 0.686975999 |
| GCDH   | glutaryl-Coenzyme A dehydrogenase                                                                                          | 0.46736  | 0.007322614 | 0.014552173 |
| GCH1   | GTP cyclohydrolase 1 (dopa-responsive dystonia)                                                                            | 0.28929  | 0.376443524 | 0.468079317 |
| GCK    | glucokinase (hexokinase 4, maturity onset diabetes of the young 2)                                                         | -0.38211 | 0.042808283 | 0.071747106 |
| GCLC   | glutamate-cysteine ligase, catalytic subunit                                                                               | 0.21145  | 0.384292333 | 0.475222818 |
| GCLM   | glutamate-cysteine ligase, modifier subunit                                                                                | 0.84563  | 0.001384691 | 3.21E-03    |
| GCNT1  | glucosaminyl (N-acetyl) transferase 1, core 2 (beta-1,6-N-acetylglucosaminyltransferase)                                   | 0.06618  | 0.7062416   | 0.775264132 |
| GCNT2  | glucosaminyl (N-acetyl) transferase 2, I-branching enzyme (I blood group)                                                  | 0.08701  | 0.353131251 | 0.445081112 |
| GCNT3  | glucosaminyl (N-acetyl) transferase 3, mucin type                                                                          | -0.08641 | 0.669911518 | 0.743411635 |
| GCNT4  | glucosaminyl (N-acetyl) transferase 4, core 2 (beta-1,6-N-acetylglucosaminyltransferase)                                   | -0.20869 | 0.004191055 | 0.008783933 |
| GDE1   | glycerophosphodiester phosphodiesterase 1                                                                                  | -0.76488 | 0.000761967 | 1.86E-03    |



|        |                                                                   |          |             |             |
|--------|-------------------------------------------------------------------|----------|-------------|-------------|
| GDPD2  | glycerophosphodiester phosphodiesterase domain containing 2       | 0.46703  | 0.086376769 | 0.132231906 |
| GDPD3  | glycerophosphodiester phosphodiesterase domain containing 3       | 0.19538  | 0.167304218 | 0.233052468 |
| GDPD5  | glycerophosphodiester phosphodiesterase domain containing 5       | -0.94954 | 1.90E-10    | 1.25E-09    |
| GFOD1  | glucose-fructose oxidoreductase domain containing 1               | -3.11290 | 1.14E-43    | 7.50E-42    |
| GFOD2  | glucose-fructose oxidoreductase domain containing 2               | -0.53341 | 3.11E-07    | 1.34E-06    |
| GFPT1  | glutamine-fructose-6-phosphate transaminase 1                     | 0.17567  | 0.412559265 | 0.504038601 |
| GFPT2  | glutamine-fructose-6-phosphate transaminase 2                     | 0.59143  | 0.163300575 | 0.228328796 |
| GGH    | gamma-glutamyl hydrolase (conjugase, folylpolyglutamyl hydrolase) | 1.29603  | 5.18E-06    | 1.85E-05    |
| GGPS1  | geranylgeranyl diphosphate synthase 1                             | 0.35106  | 0.004231868 | 8.84E-03    |
| GGT1   | gamma-glutamyltransferase 1                                       | 0.15485  | 0.274875333 | 0.359833581 |
| GGT5   | gamma-glutamyltransferase 5                                       | 0.89432  | 9.15E-05    | 2.63E-04    |
| GGTLC1 | gamma-glutamyltransferase-like activity 4                         | -0.00595 | 0.965498847 | 0.976391243 |
| GK     | glycerol kinase                                                   | 0.22142  | 0.084250933 | 0.129919286 |
| GK2    | glycerol kinase 2                                                 | -0.07144 | 0.276545436 | 0.361786919 |
| GLA    | galactosidase, alpha                                              | 1.20941  | 1.20E-12    | 9.89E-12    |
| GLB1   | galactosidase, beta 1                                             | 1.07015  | 5.91E-10    | 3.70E-09    |
| GLB1L  | galactosidase, beta 1-like                                        | 0.39896  | 0.005690397 | 1.16E-02    |
| GLB1L2 | galactosidase, beta 2-like                                        | 0.46189  | 0.070708738 | 0.111348462 |
| GLCE   | glucuronic acid epimerase                                         | -0.33261 | 0.106060236 | 0.157387197 |
| GLDC   | glycine dehydrogenase (decarboxylating)                           | 0.70334  | 0.083578219 | 1.29E-01    |
| GLO1   | glyoxalase I                                                      | 0.02195  | 0.838609904 | 0.885659187 |
| GLOD4  | glyoxalase domain containing 4                                    | 0.38628  | 0.020449253 | 0.036888492 |
| GLRA1  | Glycine receptor, alpha 1 (startle disease/hyperekplexia)         | -0.10132 | 0.066844976 | 0.105755515 |
| GLRA2  | Glycine receptor, alpha 2                                         | -0.51961 | 6.25E-08    | 3.02E-07    |
| GLRA3  | Glycine receptor, alpha 3                                         | -0.25322 | 6.23E-06    | 2.21E-05    |

|         |                                                                   |          |             |             |
|---------|-------------------------------------------------------------------|----------|-------------|-------------|
| GLRB    | Glycine receptor, beta                                            | -1.92984 | 1.50E-11    | 1.12E-10    |
| GLRX    | glutaredoxin (thioltransferase)                                   | 0.22562  | 0.356248829 | 0.448176899 |
| GLRX2   | glutaredoxin 2                                                    | -0.79050 | 1.01E-05    | 3.40E-05    |
| GLRX3   | glutaredoxin 3                                                    | 0.36998  | 0.049649454 | 0.08146678  |
| GLRX5   | glutaredoxin 5                                                    | -0.65305 | 1.23E-07    | 5.64E-07    |
| GLS     | glutaminase                                                       | -2.67429 | 3.80E-39    | 1.84E-37    |
| GLS2    | glutaminase 2 (liver, mitochondrial)                              | -2.80946 | 5.86E-57    | 5.41E-55    |
| GLT25D1 | glycosyltransferase 25 domain containing 1                        | 1.16293  | 3.57E-12    | 2.81E-11    |
| GLT25D2 | glycosyltransferase 25 domain containing 2                        | 0.11628  | 0.78314501  | 0.839290356 |
| GLT8D1  | glycosyltransferase 8 domain containing 1                         | 0.80952  | 6.95E-09    | 3.82E-08    |
| GLT8D2  | glycosyltransferase 8 domain containing 2                         | -0.18273 | 0.494101256 | 0.585377537 |
| GLTP    | glycolipid transfer protein                                       | 0.60746  | 0.001264128 | 0.002953992 |
| GLUD1   | glutamate dehydrogenase 1                                         | -0.81596 | 7.49E-06    | 2.59E-05    |
| GLUD2   | glutamate dehydrogenase 2                                         | -0.63559 | 1.08E-06    | 4.36E-06    |
| GLUL    | glutamate-ammonia ligase (glutamine synthetase)                   | 0.05764  | 0.852959264 | 0.894770993 |
| GLYAT   | glycine-N-acyltransferase                                         | -0.13126 | 0.006374655 | 0.012869587 |
| GMDS    | GDP-mannose 4,6-dehydratase                                       | 0.07214  | 0.633547348 | 0.71199655  |
| GMPPA   | GDP-mannose pyrophosphorylase A                                   | 0.96287  | 2.16E-09    | 1.28E-08    |
| GMPPB   | GDP-mannose pyrophosphorylase B                                   | 0.41245  | 0.002932252 | 0.006335035 |
| GMPR    | guanosine monophosphate reductase                                 | 0.46636  | 0.144121721 | 2.06E-01    |
| GMPR2   | guanosine monophosphate reductase 2                               | -0.01785 | 0.914451451 | 0.941997042 |
| GMPS    | guanine monphosphate synthetase                                   | 0.80380  | 1.86E-05    | 6.04E-05    |
| GNE     | glucosamine (UDP-N-acetyl)-2-epimerase/N-acetylmannosamine kinase | -0.20064 | 0.34012399  | 0.431361243 |
| GNMT    | glycine N-methyltransferase                                       | -0.21273 | 0.005030634 | 0.010320161 |
| GNPAT   | glyceronephosphate O-acyltransferase                              | 0.50764  | 3.56E-06    | 1.32E-05    |

|        |                                                                                   |          |             |             |
|--------|-----------------------------------------------------------------------------------|----------|-------------|-------------|
| GNPDA1 | glucosamine-6-phosphate deaminase 1                                               | 0.68056  | 3.57E-06    | 1.32E-05    |
| GNPTAB | N-acetylglucosamine-1-phosphate transferase, alpha and beta subunits              | -0.53968 | 3.21E-09    | 1.87E-08    |
| GNS    | glucosamine (N-acetyl)-6-sulfatase (Sanfilippo disease IIID)                      | 1.68638  | 1.70E-11    | 1.27E-10    |
| GOT1   | glutamic-oxaloacetic transaminase 1, soluble (aspartate aminotransferase 1)       | -2.92616 | 2.63E-36    | 1.05E-34    |
| GOT2   | glutamic-oxaloacetic transaminase 2, mitochondrial (aspartate aminotransferase 2) | -1.05027 | 1.13E-14    | 1.10E-13    |
| GPD1   | glycerol-3-phosphate dehydrogenase 1 (soluble)                                    | 0.06155  | 0.822970165 | 0.872314048 |
| GPD1L  | glycerol-3-phosphate dehydrogenase 1-like                                         | -1.26758 | 2.21E-08    | 1.13E-07    |
| GPD2   | glycerol-3-phosphate dehydrogenase 2 (mitochondrial)                              | 0.07575  | 0.459242301 | 0.551144981 |
| GPHN   | gephyrin                                                                          | -1.12511 | 2.07E-06    | 7.97E-06    |
| GPI    | glucose phosphate isomerase                                                       | -0.70794 | 0.001065624 | 2.52E-03    |
| GPLD1  | glycosylphosphatidylinositol specific phospholipase D1                            | -0.31936 | 9.44E-10    | 5.83E-09    |
| GPT    | glutamic-pyruvate transaminase (alanine aminotransferase)                         | 0.07785  | 0.265874129 | 0.350533142 |
| GPX1   | glutathione peroxidase 1                                                          | 0.87178  | 2.78E-07    | 1.21E-06    |
| GPX2   | glutathione peroxidase 2 (gastrointestinal)                                       | 0.01993  | 0.957261876 | 0.971303447 |
| GPX3   | glutathione peroxidase 3 (plasma)                                                 | 1.06643  | 0.026449548 | 4.67E-02    |
| GPX4   | glutathione peroxidase 4 (phospholipid hydroperoxidase)                           | -0.15315 | 0.185839902 | 0.255849414 |
| GPX5   | glutathione peroxidase 5 (epididymal androgen-related protein)                    | -0.15989 | 0.000229772 | 0.000621178 |
| GPX7   | glutathione peroxidase 7                                                          | 2.19836  | 1.76E-16    | 2.00E-15    |
| GRHPR  | glyoxylate reductase/hydroxypyruvate reductase                                    | 0.02606  | 0.859237977 | 0.899091878 |
| GRIA1  | Glutamate receptor, ionotropic, AMPA 1                                            | -1.61828 | 5.85E-05    | 1.74E-04    |
| GRIA2  | Glutamate receptor, ionotropic, AMPA 2                                            | -2.45557 | 3.56E-05    | 1.09E-04    |
| GRIA3  | Glutamate receptor, ionotropic, AMPA 3                                            | -1.63811 | 3.35E-06    | 1.25E-05    |
| GRIA4  | Glutamate receptor, ionotropic, AMPA 4                                            | 0.19729  | 0.419701737 | 0.509889092 |
| GRID2  | Glutamate receptor, ionotropic, delta 2                                           | -0.28829 | 0.008358405 | 0.016386342 |
| GRIK1  | Glutamate receptor, ionotropic, kainate 1                                         | -0.54528 | 0.027563927 | 4.85E-02    |

|        |                                                         |          |             |             |
|--------|---------------------------------------------------------|----------|-------------|-------------|
| GRIK2  | Glutamate receptor, ionotropic, kainate 2               | -0.52739 | 0.017259955 | 3.18E-02    |
| GRIK3  | Glutamate receptor, ionotropic, kainate 3               | -0.15983 | 0.013972733 | 0.02606107  |
| GRIK4  | Glutamate receptor, ionotropic, kainate 4               | -0.56794 | 2.29E-07    | 1.02E-06    |
| GRIK5  | Glutamate receptor, ionotropic, kainate 5               | -0.69869 | 6.26E-09    | 3.49E-08    |
| GRIN1  | Glutamate receptor, ionotropic, N-methyl D-aspartate 1  | -2.01450 | 7.49E-92    | 3.80E-89    |
| GRIN2A | Glutamate receptor, ionotropic, N-methyl D-aspartate 2A | -3.04695 | 3.62E-86    | 1.05E-83    |
| GRIN2B | Glutamate receptor, ionotropic, N-methyl D-aspartate 2B | -0.67062 | 6.50E-40    | 3.22E-38    |
| GRIN2C | Glutamate receptor, ionotropic, N-methyl D-aspartate 2C | -0.36309 | 3.69E-08    | 1.83E-07    |
| GRIN2D | Glutamate receptor, ionotropic, N-methyl D-aspartate 2D | -0.08827 | 0.12316811  | 0.180404011 |
| GSR    | glutathione reductase                                   | 0.23734  | 0.264052579 | 0.348583697 |
| GSS    | glutathione synthetase                                  | 0.13005  | 0.33400394  | 0.425190989 |
| GSTA1  | glutathione S-transferase A1                            | 0.26266  | 0.026917364 | 0.047420278 |
| GSTA3  | glutathione S-transferase A3                            | -0.05879 | 0.443067521 | 0.534573454 |
| GSTA4  | glutathione S-transferase A4                            | -0.61725 | 0.007765532 | 1.53E-02    |
| GSTCD  | glutathione S-transferase, C-terminal domain containing | 0.08954  | 0.292264343 | 0.378695608 |
| GSTK1  | glutathione S-transferase kappa 1                       | 1.51057  | 3.47E-13    | 3.03E-12    |
| GSTM1  | glutathione S-transferase M1                            | -0.36328 | 0.118578048 | 0.174308873 |
| GSTM2  | glutathione S-transferase M2 (muscle)                   | -0.44391 | 0.066643531 | 0.105518924 |
| GSTM3  | glutathione S-transferase M3 (brain)                    | -0.46982 | 0.152585565 | 0.216021207 |
| GSTM4  | glutathione S-transferase M4                            | 0.13915  | 0.410160068 | 0.502020119 |
| GSTM5  | glutathione S-transferase M5                            | -2.31917 | 3.24E-09    | 1.89E-08    |
| GSTO1  | glutathione S-transferase omega 1                       | -0.58032 | 0.010010238 | 0.019319956 |
| GSTP1  | glutathione S-transferase pi                            | 1.05925  | 1.15E-07    | 5.32E-07    |
| GSTT1  | glutathione S-transferase theta 1                       | -0.58343 | 0.206473415 | 0.280588538 |
| GSTT2  | glutathione S-transferase theta 2                       | 0.20141  | 0.619455773 | 0.699640882 |

|         |                                                                                                                                       |          |             |             |
|---------|---------------------------------------------------------------------------------------------------------------------------------------|----------|-------------|-------------|
| GSTZ1   | glutathione transferase zeta 1 (maleylacetoacetate isomerase)                                                                         | 0.58327  | 0.006987067 | 0.01393985  |
| GTDC1   | glycosyltransferase-like domain containing 1                                                                                          | -0.45505 | 3.70E-12    | 2.91E-11    |
| GUCY1A2 | guanylate cyclase 1, soluble, alpha 2                                                                                                 | -0.04332 | 0.655959338 | 0.733131025 |
| GUCY1A3 | guanylate cyclase 1, soluble, alpha 3                                                                                                 | -1.95722 | 4.61E-08    | 2.25E-07    |
| GUCY1B3 | guanylate cyclase 1, soluble, beta 3                                                                                                  | -3.18454 | 5.61E-24    | 1.06E-22    |
| GUCY2C  | guanylate cyclase 2C (heat stable enterotoxin receptor)                                                                               | -0.02312 | 0.774667304 | 0.833279698 |
| GUCY2D  | guanylate cyclase 2D, membrane (retina-specific)                                                                                      | -0.00734 | 0.916909395 | 0.943836354 |
| GUCY2F  | guanylate cyclase 2F, retinal                                                                                                         | -0.03209 | 0.515792276 | 0.606805027 |
| GUK1    | guanylate kinase 1                                                                                                                    | -0.42919 | 0.0007742   | 0.001882714 |
| GUSB    | glucuronidase, beta                                                                                                                   | 1.77966  | 1.52E-18    | 1.96E-17    |
| GYG1    | glycogenin 1                                                                                                                          | 0.55347  | 0.00087685  | 2.11E-03    |
| GYG2    | glycogenin 2                                                                                                                          | 0.84964  | 0.00480744  | 9.94E-03    |
| GYS1    | glycogen synthase 1 (muscle)                                                                                                          | 1.21844  | 5.83E-07    | 2.43E-06    |
| GYS2    | glycogen synthase 2 (liver)                                                                                                           | -0.00902 | 0.846184213 | 0.890420552 |
| H6PD    | Hexose-6-phosphate dehydrogenase (glucose 1-dehydrogenase)                                                                            | 0.29113  | 0.0008802   | 0.002117689 |
| HAAO    | 3-hydroxyanthranilate 3,4-dioxygenase                                                                                                 | -0.06889 | 0.507428908 | 0.600118074 |
| HADH    | hydroxyacyl-Coenzyme A dehydrogenase                                                                                                  | 0.65391  | 6.19E-05    | 1.83E-04    |
| HADHA   | hydroxyacyl-Coenzyme A dehydrogenase/3-ketoacyl-Coenzyme A thiolase/enoyl-Coenzyme A hydratase (trifunctional protein), alpha subunit | 0.49802  | 3.59E-06    | 1.33E-05    |
| HADHB   | hydroxyacyl-Coenzyme A dehydrogenase/3-ketoacyl-Coenzyme A thiolase/enoyl-Coenzyme A hydratase (trifunctional protein), beta subunit  | 0.54760  | 4.93E-07    | 2.07E-06    |
| HAGH    | hydroxyacylglutathione hydrolase                                                                                                      | -1.38332 | 1.70E-19    | 2.34E-18    |
| HAL     | histidine ammonia-lyase                                                                                                               | 0.00935  | 0.923032395 | 0.94596999  |
| HAO1    | hydroxyacid oxidase (glycolate oxidase) 1                                                                                             | -0.10695 | 0.04833316  | 0.079685692 |
| HAO2    | hydroxyacid oxidase 2 (long chain)                                                                                                    | -0.36900 | 2.22E-10    | 1.45E-09    |
| HAS1    | hyaluronan synthase 1                                                                                                                 | -0.37866 | 0.000724472 | 0.001776661 |
| HAS2    | hyaluronan synthase 2                                                                                                                 | 1.28731  | 5.83E-05    | 1.74E-04    |

|        |                                                                                                  |          |             |             |
|--------|--------------------------------------------------------------------------------------------------|----------|-------------|-------------|
| HCCS   | holocytochrome c synthase (cytochrome c heme-lyase)                                              | -0.09786 | 0.554984201 | 0.643997078 |
| HCN2   | hyperpolarization activated cyclic nucleotide-gated potassium channel 2                          | -0.46688 | 2.13E-07    | 9.50E-07    |
| HCN4   | hyperpolarization activated cyclic nucleotide-gated potassium channel 4                          | -0.00979 | 0.898006045 | 0.93079016  |
| HDC    | Histidine decarboxylase                                                                          | 0.01964  | 0.819211293 | 0.869251492 |
| HEPH   | hephaestin                                                                                       | -0.57707 | 0.01137148  | 2.17E-02    |
| HEXA   | hexosaminidase A (alpha polypeptide)                                                             | 0.71157  | 2.54E-07    | 1.12E-06    |
| HEXB   | hexosaminidase B (beta polypeptide)                                                              | 1.14930  | 7.96E-09    | 4.30E-08    |
| HGD    | homogentisate 1,2-dioxygenase (homogentisate oxidase)                                            | -0.02238 | 0.883618052 | 0.919813364 |
| HGSNAT | heparan-alpha-glucosaminide N-acetyltransferase                                                  | -0.17391 | 0.419849651 | 0.509889092 |
| HIBCH  | 3-hydroxyisobutyryl-Coenzyme A hydrolase                                                         | 0.60207  | 0.000256048 | 6.87E-04    |
| HK1    | hexokinase 1                                                                                     | -1.61989 | 6.30E-20    | 8.89E-19    |
| HK2    | hexokinase 2                                                                                     | 1.48315  | 1.42E-15    | 1.47E-14    |
| HK3    | hexokinase 3 (white cell)                                                                        | 0.46555  | 0.010675909 | 2.05E-02    |
| HKDC1  | hexokinase domain containing 1                                                                   | -0.08160 | 0.36293533  | 0.454619548 |
| HLCS   | holocarboxylase synthetase (biotin-(proprionyl-Coenzyme A-carboxylase (ATP-hydrolysing)) ligase) | 0.26576  | 0.000554458 | 0.001402006 |
| HMBS   | hydroxymethylbilane synthase                                                                     | 1.16522  | 1.17E-11    | 8.80E-11    |
| HMGCL  | 3-hydroxymethyl-3-methylglutaryl-Coenzyme A lyase (hydroxymethylglutaricaciduria)                | 0.46501  | 0.002851972 | 0.006181299 |
| HMGCR  | 3-hydroxy-3-methylglutaryl-Coenzyme A reductase                                                  | -1.06241 | 2.12E-06    | 8.14E-06    |
| HMGCS1 | 3-hydroxy-3-methylglutaryl-Coenzyme A synthase 1 (soluble)                                       | -1.03090 | 6.66E-06    | 2.34E-05    |
| HMGCS2 | 3-hydroxy-3-methylglutaryl-Coenzyme A synthase 2 (mitochondrial)                                 | -0.08079 | 0.543972484 | 0.633025793 |
| HMOX1  | heme oxygenase (decycling) 1                                                                     | 2.45895  | 5.74E-09    | 3.23E-08    |
| HMOX2  | heme oxygenase (decycling) 2                                                                     | -0.88955 | 2.38E-14    | 2.26E-13    |
| HNMT   | histamine N-methyltransferase                                                                    | 0.84551  | 3.41E-07    | 1.46E-06    |
| HPD    | 4-hydroxyphenylpyruvate dioxygenase                                                              | 0.14278  | 0.404030878 | 0.495568142 |
| HPGD   | hydroxyprostaglandin dehydrogenase 15-(NAD)                                                      | -0.04134 | 0.859289483 | 0.899091878 |

|          |                                                                              |          |             |             |
|----------|------------------------------------------------------------------------------|----------|-------------|-------------|
| HPRT1    | Hypoxanthine phosphoribosyltransferase 1 (Lesch-Nyhan syndrome)              | -1.95668 | 2.47E-12    | 1.99E-11    |
| HPSE     | heparanase                                                                   | 1.45469  | 2.56E-07    | 1.12E-06    |
| HPSE2    | heparanase 2                                                                 | -0.35655 | 0.001294003 | 0.00302033  |
| HS2ST1   | heparan sulfate 2-O-sulfotransferase 1                                       | 0.48700  | 0.005333557 | 1.09E-02    |
| HS3ST1   | heparan sulfate (glucosamine) 3-O-sulfotransferase 1                         | 0.35303  | 0.009797811 | 0.018970428 |
| HS3ST2   | heparan sulfate (glucosamine) 3-O-sulfotransferase 2                         | -4.21407 | 1.16E-33    | 3.81E-32    |
| HS3ST3A1 | heparan sulfate (glucosamine) 3-O-sulfotransferase 3A1                       | 1.08667  | 0.015411507 | 2.85E-02    |
| HS3ST3B1 | Heparan sulfate (glucosamine) 3-O-sulfotransferase 3B1                       | 0.11040  | 0.038871575 | 0.065745351 |
| HS6ST1   | Heparan sulfate 6-O-sulfotransferase 1                                       | -0.21326 | 4.64E-05    | 0.000140397 |
| HSD11B1  | hydroxysteroid (11-beta) dehydrogenase 1                                     | -0.88527 | 0.000636089 | 1.58E-03    |
| HSD11B2  | hydroxysteroid (11-beta) dehydrogenase 2                                     | 0.00155  | 0.987523027 | 0.992404505 |
| HSD17B1  | hydroxysteroid (17-beta) dehydrogenase 1                                     | 0.30458  | 0.048146181 | 0.079449015 |
| HSD17B10 | hydroxysteroid (17-beta) dehydrogenase 10                                    | 1.38370  | 7.74E-21    | 1.17E-19    |
| HSD17B11 | hydroxysteroid (17-beta) dehydrogenase 11                                    | 0.93004  | 3.32E-06    | 1.24E-05    |
| HSD17B12 | hydroxysteroid (17-beta) dehydrogenase 12                                    | -0.15456 | 0.319494078 | 0.409282584 |
| HSD17B14 | hydroxysteroid (17-beta) dehydrogenase 14                                    | 0.15798  | 0.357255494 | 0.44916538  |
| HSD17B2  | hydroxysteroid (17-beta) dehydrogenase 2                                     | 0.01858  | 0.868599242 | 0.906500133 |
| HSD17B3  | hydroxysteroid (17-beta) dehydrogenase 3                                     | 0.13382  | 0.373752943 | 0.466159345 |
| HSD17B4  | Hydroxysteroid (17-beta) dehydrogenase 4                                     | 0.26882  | 0.029072838 | 0.050801027 |
| HSD17B6  | hydroxysteroid (17-beta) dehydrogenase 6 homolog (mouse)                     | -1.43804 | 0.000404246 | 1.05E-03    |
| HSD17B7  | hydroxysteroid (17-beta) dehydrogenase 7                                     | 0.67800  | 4.68E-05    | 1.41E-04    |
| HSD17B8  | hydroxysteroid (17-beta) dehydrogenase 8                                     | 0.20928  | 0.417885314 | 0.508410905 |
| HSD3B1   | hydroxy-delta-5-steroid dehydrogenase, 3 beta- and steroid delta-isomerase 1 | -0.10368 | 0.107526348 | 0.159330223 |
| HSD3B2   | hydroxy-delta-5-steroid dehydrogenase, 3 beta- and steroid delta-isomerase 2 | -0.34239 | 3.13E-08    | 1.57E-07    |
| HSDL2    | hydroxysteroid dehydrogenase like 2                                          | 0.76426  | 0.0022014   | 0.004901912 |

|        |                                                       |          |             |             |
|--------|-------------------------------------------------------|----------|-------------|-------------|
| HTR3A  | 5-hydroxytryptamine (serotonin) receptor 3A           | -0.30090 | 0.011128236 | 0.021242914 |
| HTR3B  | 5-hydroxytryptamine (serotonin) receptor 3B           | -0.39457 | 3.20E-10    | 2.08E-09    |
| HYAL1  | hyaluronoglucosaminidase 1                            | -0.10307 | 0.613741695 | 0.6955055   |
| HYAL2  | hyaluronoglucosaminidase 2                            | 0.95995  | 2.58E-09    | 1.52E-08    |
| HYAL3  | hyaluronoglucosaminidase 3                            | -0.42214 | 2.65E-05    | 8.40E-05    |
| HYAL4  | hyaluronoglucosaminidase 4                            | -0.18898 | 0.000881878 | 0.002119218 |
| HYI    | hydroxypyruvate isomerase homolog (E. coli)           | 0.17836  | 0.165658729 | 0.231465515 |
| IDH1   | isocitrate dehydrogenase 1 (NADP+), soluble           | 2.20172  | 6.01E-35    | 2.18E-33    |
| IDH2   | isocitrate dehydrogenase 2 (NADP+), mitochondrial     | 0.25323  | 0.145241866 | 0.207502961 |
| IDH3A  | isocitrate dehydrogenase 3 (NAD+) alpha               | -0.96883 | 1.21E-07    | 5.56E-07    |
| IDH3B  | isocitrate dehydrogenase 3 (NAD+) beta                | -0.41818 | 0.002837799 | 0.006157146 |
| IDH3G  | isocitrate dehydrogenase 3 (NAD+) gamma               | -0.43095 | 8.15E-06    | 2.80E-05    |
| IDI1   | isopentenyl-diphosphate delta isomerase 1             | -1.43057 | 7.65E-11    | 5.29E-10    |
| IDO1   | indoleamine 2,3-dioxygenase 1                         | 0.35129  | 0.26934902  | 0.353738086 |
| IDS    | iduronate 2-sulfatase (Hunter syndrome)               | -1.72687 | 5.05E-20    | 7.18E-19    |
| IDUA   | iduronidase, alpha-L-                                 | -0.22428 | 0.000970366 | 0.002310017 |
| ILVBL  | ilvB (bacterial acetolactate synthase)-like           | 0.78870  | 7.91E-06    | 2.73E-05    |
| IMPA1  | inositol(myo)-1(or 4)-monophosphatase 1               | -0.14861 | 0.413733571 | 0.504874159 |
| IMPA2  | inositol(myo)-1(or 4)-monophosphatase 2               | 0.90202  | 0.009119808 | 1.78E-02    |
| IMPAD1 | inositol monophosphatase domain containing 1          | 0.66952  | 0.000501934 | 1.28E-03    |
| IMPDH1 | IMP (inosine monophosphate) dehydrogenase 1           | -0.18941 | 0.215103808 | 0.291537361 |
| IMPDH2 | IMP (inosine monophosphate) dehydrogenase 2           | 0.80977  | 1.12E-07    | 5.16E-07    |
| INPP1  | inositol polyphosphate-1-phosphatase                  | -0.67920 | 0.000169438 | 4.69E-04    |
| INPP4A | inositol polyphosphate-4-phosphatase, type I, 107kDa  | -1.41089 | 1.81E-76    | 2.83E-74    |
| INPP4B | inositol polyphosphate-4-phosphatase, type II, 105kDa | -1.08708 | 6.05E-09    | 3.38E-08    |



|        |                                                                      |          |             |             |
|--------|----------------------------------------------------------------------|----------|-------------|-------------|
| INPP5A | inositol polyphosphate-5-phosphatase, 40kDa                          | -2.00631 | 3.89E-25    | 8.00E-24    |
| INPP5B | inositol polyphosphate-5-phosphatase, 75kDa                          | 0.15675  | 0.056015202 | 0.090667918 |
| INPP5D | inositol polyphosphate-5-phosphatase, 145kDa                         | 0.52670  | 0.004839168 | 9.99E-03    |
| INPP5E | inositol polyphosphate-5-phosphatase, 72 kDa                         | -0.25666 | 0.119011425 | 0.174819528 |
| INPP5F | inositol polyphosphate-5-phosphatase F                               | -3.15406 | 9.55E-24    | 1.77E-22    |
| INPP5J | inositol polyphosphate-5-phosphatase J                               | -0.71010 | 7.45E-16    | 7.97E-15    |
| INPP5K | inositol polyphosphate-5-phosphatase K                               | -0.30003 | 0.001766327 | 0.004003281 |
| INPPL1 | inositol polyphosphate phosphatase-like 1                            | 0.81584  | 1.39E-07    | 6.33E-07    |
| IP6K1  | inositol hexaphosphate kinase 1                                      | -1.04030 | 4.33E-13    | 3.72E-12    |
| IP6K2  | inositol hexaphosphate kinase 2                                      | -0.25806 | 0.089522913 | 0.136431845 |
| IPPK   | inositol 1,3,4,5,6-pentakisphosphate 2-kinase                        | 0.00648  | 0.947082935 | 0.964156037 |
| ISCA1  | iron-sulfur cluster assembly 1 homolog ( <i>S. cerevisiae</i> )      | -0.43137 | 0.009354577 | 0.0182513   |
| ISYNA1 | myo-inositol 1-phosphate synthase A1                                 | 0.39049  | 0.100564935 | 0.150219334 |
| ITPA   | inosine triphosphatase (nucleoside triphosphate pyrophosphatase)     | 0.86107  | 4.44E-12    | 3.46E-11    |
| ITPK1  | inositol 1,3,4-triphosphate 5/6 kinase                               | -0.26509 | 0.000517129 | 0.001312513 |
| ITPKA  | inositol 1,4,5-trisphosphate 3-kinase A                              | -3.12958 | 3.13E-61    | 3.35E-59    |
| ITPKB  | inositol 1,4,5-trisphosphate 3-kinase B                              | 0.01493  | 0.967569533 | 0.97766842  |
| ITPKC  | inositol 1,4,5-trisphosphate 3-kinase C                              | 0.59507  | 0.001385776 | 3.21E-03    |
| ITPR1  | Inositol 1,4,5-triphosphate receptor, type 1                         | -2.91978 | 6.14E-35    | 2.19E-33    |
| ITPR2  | inositol 1,4,5-triphosphate receptor, type 2                         | 0.67063  | 0.004881572 | 1.01E-02    |
| ITPR3  | inositol 1,4,5-triphosphate receptor, type 3                         | 0.26286  | 0.283368021 | 0.369050087 |
| IVD    | isovaleryl Coenzyme A dehydrogenase                                  | 0.35484  | 0.03063758  | 0.053054685 |
| KCNA1  | potassium voltage-gated channel, shaker-related subfamily, member 1  | -0.44459 | 5.57E-05    | 0.000166738 |
| KCNA10 | potassium voltage-gated channel, shaker-related subfamily, member 10 | -0.14790 | 0.011022759 | 0.021067886 |
| KCNA2  | potassium voltage-gated channel, shaker-related subfamily, member 2  | -0.15176 | 0.012718672 | 0.02396391  |

|        |                                                                          |          |             |             |
|--------|--------------------------------------------------------------------------|----------|-------------|-------------|
| KCNA3  | potassium voltage-gated channel, shaker-related subfamily, member 3      | -0.93160 | 1.98E-19    | 2.69E-18    |
| KCNA4  | potassium voltage-gated channel, shaker-related subfamily, member 4      | -0.78476 | 7.78E-20    | 1.09E-18    |
| KCNA5  | potassium voltage-gated channel, shaker-related subfamily, member 5      | -0.79231 | 2.08E-09    | 1.23E-08    |
| KCNA6  | potassium voltage-gated channel, shaker-related, subfamily, member 6     | -0.89896 | 7.89E-08    | 3.76E-07    |
| KCNAB1 | potassium voltage-gated channel, shaker-related subfamily, beta member 1 | -2.07847 | 1.57E-58    | 1.59E-56    |
| KCNAB2 | potassium voltage-gated channel, shaker-related subfamily, beta member 2 | -2.41845 | 3.23E-90    | 1.31E-87    |
| KCNAB3 | potassium voltage-gated channel, shaker-related subfamily, beta member 3 | -0.02612 | 0.759858318 | 0.81995327  |
| KCNB1  | potassium voltage gated channel, Shab-related subfamily, member 1        | -3.23375 | 9.51E-18    | 1.14E-16    |
| KCNB2  | potassium voltage gated channel, Shab-related subfamily, member 2        | -0.84950 | 3.45E-36    | 1.32E-34    |
| KCNC1  | potassium voltage gated channel, Shaw-related subfamily, member 1        | -2.76458 | 5.68E-56    | 4.82E-54    |
| KCNC2  | potassium voltage gated channel, Shaw-related subfamily, member 2        | -0.29215 | 0.000275096 | 0.000733949 |
| KCNC3  | potassium voltage gated channel, Shaw-related subfamily, member 3        | -0.06848 | 0.285452347 | 0.371051548 |
| KCNC4  | potassium voltage gated channel, Shaw-related subfamily, member 4        | -0.44974 | 6.91E-10    | 4.31E-09    |
| KCND1  | potassium voltage-gated channel, Shal-related family, member 1           | 0.02547  | 0.851098105 | 0.893804593 |
| KCND2  | potassium voltage-gated channel, Shal-related family, member 2           | 0.24568  | 0.660480825 | 0.737373705 |
| KCND3  | potassium voltage-gated channel, Shal-related family, member 3           | -0.55821 | 2.30E-05    | 7.34E-05    |
| KCNE1  | potassium voltage-gated channel, Isk-related subfamily, member 1         | -0.05259 | 0.408231028 | 0.499960048 |
| KCNE1L | potassium voltage-gated channel, Isk-related family, member 1-like       | 0.06873  | 0.855540277 | 0.89701567  |
| KCNE2  | potassium voltage-gated channel, Isk-related subfamily, gene 2           | -0.18520 | 0.007507751 | 0.014876469 |
| KCNE4  | potassium voltage-gated channel, Isk-related subfamily, gene 4           | 1.19251  | 0.000431462 | 1.11E-03    |
| KCNF1  | potassium voltage-gated channel, subfamily F, member 1                   | -1.11329 | 0.003732729 | 7.88E-03    |
| KCNG1  | potassium voltage-gated channel, subfamily G, member 1                   | -1.11382 | 8.24E-13    | 6.86E-12    |
| KCNG2  | potassium voltage-gated channel, subfamily G, member 2                   | 0.00132  | 0.980090908 | 0.988355563 |
| KCNH1  | potassium voltage-gated channel, subfamily H (eag-related), member 1     | -0.79705 | 1.06E-20    | 1.58E-19    |
| KCNH2  | potassium voltage-gated channel, subfamily H (eag-related), member 2     | 0.15136  | 0.453491051 | 0.545853942 |

|        |                                                                      |          |             |             |
|--------|----------------------------------------------------------------------|----------|-------------|-------------|
| KCNH4  | potassium voltage-gated channel, subfamily H (eag-related), member 4 | -0.20849 | 0.001689531 | 0.003850691 |
| KCNH6  | potassium voltage-gated channel, subfamily H (eag-related), member 6 | -0.27819 | 7.02E-06    | 2.45E-05    |
| KCNJ1  | potassium inwardly-rectifying channel, subfamily J, member 1         | -0.18302 | 0.00034893  | 0.000917691 |
| KCNJ10 | potassium inwardly-rectifying channel, subfamily J, member 10        | -0.32180 | 0.150762403 | 0.214011235 |
| KCNJ12 | potassium inwardly-rectifying channel, subfamily J, member 12        | -0.40262 | 1.46E-06    | 5.76E-06    |
| KCNJ13 | potassium inwardly-rectifying channel, subfamily J, member 13        | -0.37494 | 7.95E-05    | 0.000232289 |
| KCNJ14 | potassium inwardly-rectifying channel, subfamily J, member 14        | 0.09336  | 0.102345506 | 0.152431073 |
| KCNJ15 | potassium inwardly-rectifying channel, subfamily J, member 15        | -0.06821 | 0.716781257 | 0.783871057 |
| KCNJ16 | potassium inwardly-rectifying channel, subfamily J, member 16        | 0.19989  | 0.764875475 | 0.823618559 |
| KCNJ2  | potassium inwardly-rectifying channel, subfamily J, member 2         | -0.48344 | 0.082669394 | 0.127904778 |
| KCNJ3  | potassium inwardly-rectifying channel, subfamily J, member 3         | -1.92447 | 2.62E-86    | 8.87E-84    |
| KCNJ4  | potassium inwardly-rectifying channel, subfamily J, member 4         | -2.37350 | 1.89E-63    | 2.40E-61    |
| KCNJ5  | potassium inwardly-rectifying channel, subfamily J, member 5         | -0.08618 | 0.138222074 | 0.199861647 |
| KCNJ6  | potassium inwardly-rectifying channel, subfamily J, member 6         | -3.07847 | 8.55E-37    | 3.70E-35    |
| KCNJ8  | potassium inwardly-rectifying channel, subfamily J, member 8         | 0.92662  | 0.002541321 | 0.005591456 |
| KCNJ9  | potassium inwardly-rectifying channel, subfamily J, member 9         | -0.82050 | 5.39E-28    | 1.27E-26    |
| KCNK1  | potassium channel, subfamily K, member 1                             | -4.32543 | 1.99E-21    | 3.16E-20    |
| KCNK10 | potassium channel, subfamily K, member 10                            | -1.52620 | 1.43E-12    | 1.17E-11    |
| KCNK12 | potassium channel, subfamily K, member 12                            | -2.23950 | 3.41E-41    | 1.88E-39    |
| KCNK13 | potassium channel, subfamily K, member 13                            | -0.08858 | 0.067999907 | 0.107415549 |
| KCNK15 | potassium channel, subfamily K, member 15                            | -0.25489 | 0.002096076 | 0.004682772 |
| KCNK2  | potassium channel, subfamily K, member 2                             | -0.22918 | 0.170629612 | 0.236946722 |
| KCNK3  | potassium channel, subfamily K, member 3                             | -2.40622 | 7.09E-19    | 9.42E-18    |
| KCNK5  | potassium channel, subfamily K, member 5                             | 0.04482  | 0.720198966 | 0.786339687 |
| KCNK7  | potassium channel, subfamily K, member 7                             | -0.02237 | 0.743145263 | 0.806197609 |

|        |                                                                                           |          |             |             |
|--------|-------------------------------------------------------------------------------------------|----------|-------------|-------------|
| KCNMA1 | potassium large conductance calcium-activated channel, subfamily M, alpha member 1        | -2.66763 | 9.00E-25    | 1.83E-23    |
| KCNMB1 | potassium large conductance calcium-activated channel, subfamily M, beta member 1         | 1.08487  | 0.001197176 | 2.81E-03    |
| KCNMB2 | potassium large conductance calcium-activated channel, subfamily M, beta member 2         | -0.71975 | 2.12E-05    | 6.80E-05    |
| KCNMB3 | potassium large conductance calcium-activated channel, subfamily M beta member 3          | 0.42859  | 0.001650166 | 3.77E-03    |
| KCNMB4 | potassium large conductance calcium-activated channel, subfamily M, beta member 4         | -1.29424 | 3.52E-07    | 1.51E-06    |
| KCNN1  | potassium intermediate/small conductance calcium-activated channel, subfamily N, member 1 | -1.98934 | 5.32E-63    | 6.36E-61    |
| KCNN2  | potassium intermediate/small conductance calcium-activated channel, subfamily N, member 2 | -0.23799 | 0.617225752 | 0.698286007 |
| KCNN3  | potassium intermediate/small conductance calcium-activated channel, subfamily N, member 3 | 0.09771  | 0.793739408 | 0.846183648 |
| KCNN4  | potassium intermediate/small conductance calcium-activated channel, subfamily N, member 4 | -0.18739 | 0.442252911 | 0.533907463 |
| KCNQ1  | potassium voltage-gated channel, subfamily Q, member 1                                    | -0.07934 | 0.315736865 | 0.405235509 |
| KCNQ2  | potassium voltage-gated channel, subfamily Q, member 2                                    | 0.62003  | 0.105321459 | 1.56E-01    |
| KCNQ3  | potassium voltage-gated channel, subfamily Q, member 3                                    | -0.94338 | 6.85E-22    | 1.11E-20    |
| KCNQ4  | potassium voltage-gated channel, subfamily Q, member 4                                    | -0.20279 | 0.001443394 | 0.003330784 |
| KCNS1  | K <sup>+</sup> voltage-gated channel, subfamily S, 1                                      | -1.92274 | 2.13E-38    | 9.63E-37    |
| KCNS3  | potassium voltage-gated channel, delayed-rectifier, subfamily S, member 3                 | -0.52672 | 0.096263937 | 0.145073821 |
| KCNV1  | potassium channel, subfamily V, member 1                                                  | -3.01472 | 8.74E-86    | 2.22E-83    |
| KCNV2  | potassium channel, subfamily V, member 2                                                  | -0.06303 | 0.14187948  | 0.203664561 |
| KCTD12 | potassium channel tetramerisation domain containing 12                                    | 0.79157  | 0.014534525 | 2.70E-02    |
| KCTD13 | potassium channel tetramerisation domain containing 13                                    | -1.27877 | 9.10E-08    | 4.25E-07    |
| KCTD14 | potassium channel tetramerisation domain containing 14                                    | 0.69269  | 0.012029389 | 2.28E-02    |
| KCTD15 | potassium channel tetramerisation domain containing 15                                    | -0.26276 | 0.064707277 | 0.102613022 |
| KCTD17 | potassium channel tetramerisation domain containing 17                                    | -0.73722 | 1.82E-10    | 1.21E-09    |
| KCTD2  | potassium channel tetramerisation domain containing 2                                     | -0.73204 | 8.52E-08    | 4.02E-07    |
| KCTD20 | potassium channel tetramerisation domain containing 20                                    | 0.21680  | 0.188851419 | 0.259065409 |
| KCTD3  | potassium channel tetramerisation domain containing 3                                     | 1.42068  | 1.52E-10    | 1.01E-09    |

|         |                                                                 |          |             |             |
|---------|-----------------------------------------------------------------|----------|-------------|-------------|
| KCTD5   | potassium channel tetramerisation domain containing 5           | 1.13431  | 4.49E-11    | 3.19E-10    |
| KCTD7   | potassium channel tetramerisation domain containing 7           | 0.02008  | 0.914659203 | 0.941997042 |
| KCTD9   | potassium channel tetramerisation domain containing 9           | 0.94226  | 2.53E-05    | 8.03E-05    |
| KDSR    | 3-ketodihydrosphingosine reductase                              | 0.15520  | 0.036646936 | 0.062293663 |
| KHK     | ketoheksokinase (fruktokinase)                                  | -0.23629 | 0.005145867 | 0.010545915 |
| KL      | klotho                                                          | -0.47839 | 0.006722034 | 0.01350385  |
| KMO     | kynurenine 3-monooxygenase (kynurenine 3-hydroxylase)           | 0.41289  | 0.154180419 | 0.217824039 |
| KYNU    | kynureninase (L-kynurenine hydrolase)                           | 0.75758  | 0.002599243 | 5.70E-03    |
| L2HGDH  | L-2-hydroxyglutarate dehydrogenase                              | 0.12178  | 0.268232839 | 0.352956221 |
| LALBA   | lactalbumin, alpha-                                             | -0.02687 | 0.663275018 | 0.738888946 |
| LARGE   | like-glycosyltransferase                                        | -1.27385 | 2.86E-58    | 2.77E-56    |
| LBR     | Lamin B receptor                                                | 1.96324  | 7.59E-26    | 1.64E-24    |
| LCAT    | lecithin-cholesterol acyltransferase                            | 0.42962  | 0.001504161 | 3.45E-03    |
| LCT     | lactase                                                         | -0.15733 | 0.017902008 | 0.03275858  |
| LDHA    | lactate dehydrogenase A                                         | 0.44362  | 0.030126261 | 5.22E-02    |
| LDHAL6B | lactate dehydrogenase A-like 6B                                 | -0.03719 | 0.418132333 | 0.508410905 |
| LDHB    | lactate dehydrogenase B                                         | -0.30871 | 0.01780874  | 3.26E-02    |
| LDHC    | lactate dehydrogenase C                                         | -0.29625 | 0.002697649 | 0.005896879 |
| LGSN    | lens protein with glutamine synthetase domain                   | 0.03275  | 0.824356225 | 0.87304085  |
| LIAS    | lipoic acid synthetase                                          | -0.48229 | 0.011026184 | 0.021067886 |
| LIPA    | Lipase A, lysosomal acid, cholesterol esterase (Wolman disease) | 0.22113  | 0.337936332 | 0.429390352 |
| LIPC    | lipase, hepatic                                                 | -0.14539 | 0.100656677 | 0.15024598  |
| LIPE    | lipase, hormone-sensitive                                       | -0.16693 | 0.000752057 | 0.001839869 |
| LIPF    | lipase, gastric                                                 | -0.17140 | 0.004976395 | 0.010223657 |
| LIPG    | lipase, endothelial                                             | 0.80934  | 0.006059931 | 0.01228299  |

|        |                                                                                   |          |             |             |
|--------|-----------------------------------------------------------------------------------|----------|-------------|-------------|
| LIPT1  | lipoyltransferase 1                                                               | 0.59527  | 0.001877227 | 0.00422636  |
| LNPEP  | leucyl/cystinyl aminopeptidase                                                    | 0.23509  | 0.041297479 | 0.069616729 |
| LPCAT1 | lysophosphatidylcholine acyltransferase 1                                         | 0.83819  | 2.69E-05    | 8.50E-05    |
| LPCAT3 | membrane bound O-acyltransferase domain containing 5                              | 0.36736  | 0.000222461 | 6.05E-04    |
| LPCAT4 | lysophosphatidylcholine acyltransferase 4                                         | -2.14540 | 4.97E-54    | 4.04E-52    |
| LPGAT1 | lysophosphatidylglycerol acyltransferase 1                                        | -0.03063 | 0.887667237 | 0.923083117 |
| LPIN1  | lipin 1                                                                           | -0.92926 | 7.64E-06    | 2.64E-05    |
| LPIN2  | lipin 2                                                                           | -0.30966 | 0.057850462 | 0.093045878 |
| LPL    | lipoprotein lipase                                                                | 2.68992  | 8.24E-08    | 3.90E-07    |
| LPO    | lactoperoxidase                                                                   | -0.10497 | 0.198642054 | 0.270851305 |
| LPPR2  | lipid phosphate phosphatase-related protein type 2                                | -0.86795 | 1.55E-11    | 1.16E-10    |
| LPPR4  | plasticity related gene 1                                                         | -2.70484 | 1.51E-09    | 9.06E-09    |
| LRAT   | lecithin retinol acyltransferase (phosphatidylcholine--retinol O-acyltransferase) | -0.13496 | 0.150257548 | 0.213617899 |
| LSS    | lanosterol synthase (2,3-oxidosqualene-lanosterol cyclase)                        | -0.48985 | 1.58E-05    | 5.18E-05    |
| LTA4H  | leukotriene A4 hydrolase                                                          | 0.09972  | 0.498608034 | 0.590029181 |
| LTC4S  | leukotriene C4 synthase                                                           | 0.03321  | 0.875626303 | 0.912428639 |
| LYPLA1 | lysophospholipase I                                                               | 1.83428  | 8.94E-20    | 1.24E-18    |
| LYPLA2 | lysophospholipase II                                                              | -0.10059 | 0.359265553 | 0.45113457  |
| LYZ    | lysozyme (renal amyloidosis)                                                      | 2.86656  | 6.83E-08    | 3.28E-07    |
| LYZL6  | lysozyme-like 6                                                                   | -0.07305 | 0.236904021 | 0.317276597 |
| MAGT1  | magnesium transporter 1                                                           | 1.90516  | 4.06E-22    | 6.76E-21    |
| MAN1A1 | mannosidase, alpha, class 1A, member 1                                            | -0.43814 | 0.092747171 | 0.140502979 |
| MAN1A2 | mannosidase, alpha, class 1A, member 2                                            | 0.21928  | 0.047334233 | 0.078299834 |
| MAN1B1 | mannosidase, alpha, class 1B, member 1                                            | 0.48323  | 0.00094266  | 0.002251972 |
| MAN1C1 | mannosidase, alpha, class 1C, member 1                                            | 0.23961  | 0.579221161 | 0.666793104 |

|        |                                                      |          |             |             |
|--------|------------------------------------------------------|----------|-------------|-------------|
| MAN2A1 | mannosidase, alpha, class 2A, member 1               | 0.49541  | 0.057844954 | 0.093045878 |
| MAN2A2 | mannosidase, alpha, class 2A, member 2               | -1.17704 | 3.94E-16    | 4.29E-15    |
| MAN2B1 | mannosidase, alpha, class 2B, member 1               | 1.95900  | 2.88E-20    | 4.18E-19    |
| MAN2B2 | mannosidase, alpha, class 2B, member 2               | -0.61823 | 0.002726183 | 0.005933971 |
| MAN2C1 | mannosidase, alpha, class 2C, member 1               | 0.10657  | 0.542697036 | 0.632265372 |
| MANBA  | mannosidase, beta A, lysosomal                       | 0.85597  | 2.50E-07    | 1.10E-06    |
| MANEA  | mannosidase, endo-alpha                              | 1.04027  | 3.43E-08    | 1.71E-07    |
| MAOA   | monoamine oxidase A                                  | -0.16534 | 0.588440779 | 0.675875765 |
| MAOB   | Monoamine oxidase B                                  | -0.02749 | 0.960238068 | 0.972421759 |
| MAT1A  | methionine adenosyltransferase I, alpha              | -0.19044 | 0.008054893 | 0.015821833 |
| MAT2A  | methionine adenosyltransferase II, alpha             | 0.79406  | 1.34E-05    | 4.42E-05    |
| MAT2B  | methionine adenosyltransferase II, beta              | -0.23967 | 0.127492123 | 0.186200781 |
| MBOAT2 | membrane bound O-acyltransferase domain containing 2 | -0.39848 | 0.099989723 | 0.149579917 |
| MBOAT7 | membrane bound O-acyltransferase domain containing 7 | -1.44586 | 1.65E-35    | 6.10E-34    |
| MCAT   | malonyl CoA:ACP acyltransferase (mitochondrial)      | -0.77975 | 8.82E-07    | 3.59E-06    |
| MCCC1  | methylcrotonoyl-Coenzyme A carboxylase 1 (alpha)     | 0.12862  | 0.444424519 | 0.535575013 |
| MCCC2  | methylcrotonoyl-Coenzyme A carboxylase 2 (beta)      | 0.54293  | 2.98E-05    | 9.33E-05    |
| MCOLN1 | Mucolipin 1                                          | 0.24395  | 0.190053161 | 0.260187257 |
| MCOLN3 | Mucolipin 3                                          | 0.04720  | 0.707152411 | 0.775845036 |
| MDH1   | malate dehydrogenase 1, NAD (soluble)                | -1.69076 | 5.06E-32    | 1.58E-30    |
| MDH2   | malate dehydrogenase 2, NAD (mitochondrial)          | -0.56291 | 1.97E-05    | 6.32E-05    |
| ME1    | malic enzyme 1, NADP(+)-dependent, cytosolic         | -1.98483 | 3.00E-06    | 1.13E-05    |
| ME2    | malic enzyme 2, NADP(+)-dependent, mitochondrial     | 0.12769  | 0.433354142 | 0.525035144 |
| ME3    | malic enzyme 3, NADP(+)-dependent, mitochondrial     | -1.33421 | 7.49E-13    | 6.34E-12    |
| MECR   | mitochondrial trans-2-enoyl-CoA reductase            | -0.58637 | 4.26E-07    | 1.80E-06    |

|        |                                                                                                   |          |             |             |
|--------|---------------------------------------------------------------------------------------------------|----------|-------------|-------------|
| MFNG   | MFNG O-fucosylpeptide 3-beta-N-acetylglucosaminyltransferase                                      | 0.21395  | 0.04971863  | 8.15E-02    |
| MFSD1  | Major Facilitator Superfamily Domain Containing 1                                                 | 1.46952  | 7.60E-18    | 9.20E-17    |
| MFSD10 | Major Facilitator Superfamily Domain Containing 10                                                | 0.77311  | 5.64E-07    | 2.36E-06    |
| MFSD11 | Major Facilitator Superfamily Domain Containing 11                                                | 0.48733  | 0.000544222 | 1.38E-03    |
| MFSD5  | Major Facilitator Superfamily Domain Containing 5                                                 | 0.56444  | 0.000144042 | 4.03E-04    |
| MFSD7  | Major Facilitator Superfamily Domain Containing 7                                                 | -0.07832 | 0.292666258 | 0.378974842 |
| MFSD9  | Major Facilitator Superfamily Domain Containing 9                                                 | 0.23033  | 0.033070091 | 0.056592168 |
| MGAM   | maltase-glucoamylase (alpha-glucosidase)                                                          | 0.12376  | 0.295069441 | 0.381843523 |
| MGAT1  | mannosyl (alpha-1,3-)-glycoprotein beta-1,2-N-acetylglucosaminyltransferase                       | 1.01793  | 1.75E-09    | 1.05E-08    |
| MGAT2  | mannosyl (alpha-1,6-)-glycoprotein beta-1,2-N-acetylglucosaminyltransferase                       | 0.76133  | 4.03E-06    | 1.47E-05    |
| MGAT3  | mannosyl (beta-1,4-)-glycoprotein beta-1,4-N-acetylglucosaminyltransferase                        | -0.99456 | 1.90E-25    | 3.95E-24    |
| MGAT4A | Mannosyl (alpha-1,3-)-glycoprotein beta-1,4-N-acetylglucosaminyltransferase, isozyme A            | 1.18585  | 2.26E-06    | 8.65E-06    |
| MGAT4B | mannosyl (alpha-1,3-)-glycoprotein beta-1,4-N-acetylglucosaminyltransferase, isozyme B            | 0.26293  | 0.229784523 | 0.308554778 |
| MGAT4C | mannosyl (alpha-1,3-)-glycoprotein beta-1,4-N-acetylglucosaminyltransferase, isozyme C (putative) | -0.39698 | 0.066595888 | 0.105518924 |
| MGAT5  | mannosyl (alpha-1,6-)-glycoprotein beta-1,6-N-acetyl-glycosaminyltransferase                      | -0.61450 | 3.12E-11    | 2.26E-10    |
| MGLL   | monoglyceride lipase                                                                              | -1.24578 | 1.84E-05    | 5.96E-05    |
| MGST2  | microsomal glutathione S-transferase 2                                                            | 1.01221  | 2.85E-05    | 8.98E-05    |
| MGST3  | microsomal glutathione S-transferase 3                                                            | -1.19996 | 1.79E-15    | 1.82E-14    |
| MICAL1 | microtubule associated monooxygenase, calponin and LIM domain containing 1                        | 0.49475  | 0.019951552 | 0.036086748 |
| MICAL2 | microtubule associated monooxygenase, calponin and LIM domain containing 2                        | -2.61621 | 7.74E-21    | 1.17E-19    |
| MICAL3 | microtubule associated monooxygenase, calponin and LIM domain containing 3                        | -0.40472 | 0.089085193 | 0.135866615 |
| MINPP1 | multiple inositol polyphosphate histidine phosphatase, 1                                          | 0.46399  | 0.017278721 | 0.031760976 |
| MIP    | Major intrinsic protein of lens fiber                                                             | -0.27598 | 3.13E-05    | 9.73E-05    |
| MLYCD  | malonyl-CoA decarboxylase                                                                         | -0.02711 | 0.792627186 | 0.845441274 |
| MMACHC | methylmalonic aciduria (cobalamin deficiency) cblC type, with homocystinuria                      | -0.40612 | 0.012575488 | 0.023738131 |



|         |                                                                                                                                            |          |             |             |
|---------|--------------------------------------------------------------------------------------------------------------------------------------------|----------|-------------|-------------|
| MMADHC  | methylmalonic aciduria (cobalamin deficiency) cblD type, with homocystinuria                                                               | 0.58952  | 0.000160911 | 4.48E-04    |
| MME     | membrane metallo-endopeptidase                                                                                                             | 0.10544  | 0.713683529 | 0.78149974  |
| MOCOS   | molybdenum cofactor sulfurase                                                                                                              | 0.44220  | 0.109424532 | 1.62E-01    |
| MOCS1   | molybdenum cofactor synthesis 1                                                                                                            | 0.00859  | 0.939709815 | 0.958089295 |
| MOCS2   | molybdenum cofactor synthesis 2                                                                                                            | -0.22138 | 0.239211942 | 0.320156601 |
| MOCS3   | molybdenum cofactor synthesis 3                                                                                                            | -0.16046 | 0.116007199 | 0.17090046  |
| MOGAT2  | monoacylglycerol O-acyltransferase 2                                                                                                       | -0.21082 | 0.0053667   | 0.010965327 |
| MPI     | mannose phosphate isomerase                                                                                                                | -0.10272 | 0.460239992 | 0.551690981 |
| MPO     | myeloperoxidase                                                                                                                            | -0.15011 | 0.001831412 | 0.004141557 |
| MPST    | mercaptopyruvate sulfurtransferase                                                                                                         | 1.05133  | 3.33E-08    | 1.67E-07    |
| MSRA    | methionine sulfoxide reductase A                                                                                                           | -0.52928 | 0.008724984 | 1.71E-02    |
| MSRB2   | methionine sulfoxide reductase B2                                                                                                          | -0.93580 | 6.76E-08    | 3.26E-07    |
| MTAP    | methylthioadenosine phosphorylase                                                                                                          | 0.06083  | 0.439584891 | 0.531633601 |
| MTHFD1  | methylenetetrahydrofolate dehydrogenase (NADP+ dependent) 1,<br>methenyltetrahydrofolate cyclohydrolase, formyltetrahydrofolate synthetase | 0.55571  | 0.000228429 | 6.18E-04    |
| MTHFD2  | methylenetetrahydrofolate dehydrogenase (NADP+ dependent) 2,<br>methenyltetrahydrofolate cyclohydrolase                                    | 2.82918  | 9.04E-22    | 1.45E-20    |
| MTHFD2L | methylenetetrahydrofolate dehydrogenase (NADP+ dependent) 2-like                                                                           | -0.12096 | 0.560358645 | 0.649122009 |
| MTHFR   | 5,10-methylenetetrahydrofolate reductase (NADPH)                                                                                           | -0.34116 | 3.03E-07    | 1.31E-06    |
| MTHFS   | 5,10-methenyltetrahydrofolate synthetase (5-formyltetrahydrofolate cyclo-ligase)                                                           | 0.65878  | 0.000221115 | 6.02E-04    |
| MTHFSD  | methenyltetrahydrofolate synthetase domain containing                                                                                      | 0.44144  | 3.20E-06    | 1.20E-05    |
| MTR     | 5-methyltetrahydrofolate-homocysteine methyltransferase                                                                                    | 0.41498  | 0.024109191 | 0.042919426 |
| MTRR    | 5-methyltetrahydrofolate-homocysteine methyltransferase reductase                                                                          | 0.20457  | 0.101405708 | 0.151142085 |
| MTTP    | microsomal triglyceride transfer protein                                                                                                   | 0.51820  | 0.098242403 | 1.48E-01    |
| MUT     | methylmalonyl Coenzyme A mutase                                                                                                            | 0.05189  | 0.703275151 | 0.772842369 |
| MVD     | mevalonate (diphospho) decarboxylase                                                                                                       | -0.02299 | 0.782821208 | 0.839290356 |
| MVK     | mevalonate kinase (mevalonic aciduria)                                                                                                     | -0.39220 | 3.01E-05    | 9.40E-05    |

|          |                                                                    |          |             |             |
|----------|--------------------------------------------------------------------|----------|-------------|-------------|
| NAALAD2  | N-acetylated alpha-linked acidic dipeptidase 2                     | -0.08554 | 0.560330591 | 0.649122009 |
| NAALADL1 | N-acetylated alpha-linked acidic dipeptidase-like 1                | 0.13246  | 0.145767599 | 0.207961774 |
| NADK     | NAD kinase                                                         | 0.21464  | 0.055903207 | 0.090558741 |
| NADSYN1  | NAD synthetase 1                                                   | 0.76968  | 1.08E-06    | 4.36E-06    |
| NAGA     | N-acetylgalactosaminidase, alpha-                                  | 1.10654  | 2.37E-11    | 1.72E-10    |
| NAGK     | N-acetylglucosamine kinase                                         | 0.38233  | 0.010722583 | 0.020545723 |
| NAGLU    | N-acetylglucosaminidase, alpha- (Sanfilippo disease IIIB)          | 0.49309  | 3.80E-09    | 2.19E-08    |
| NAGPA    | N-acetylglucosamine-1-phosphodiester alpha-N-acetylglucosaminidase | -1.24825 | 3.30E-16    | 3.63E-15    |
| NANS     | N-acetylneuraminic acid synthase (sialic acid synthase)            | 0.41950  | 0.013464952 | 0.0251833   |
| NAT1     | N-acetyltransferase 1 (arylamine N-acetyltransferase)              | 1.56509  | 8.04E-08    | 3.82E-07    |
| NAT10    | N-acetyltransferase 10                                             | 0.30055  | 0.024780913 | 0.044070054 |
| NAT2     | N-acetyltransferase 2 (arylamine N-acetyltransferase)              | -0.13918 | 0.378817171 | 0.469594701 |
| NAT6     | N-acetyltransferase 6                                              | -0.40577 | 0.000231892 | 0.000625247 |
| NAT8     | N-acetyltransferase 8                                              | -0.10212 | 0.175802806 | 0.243134085 |
| NAT8B    | N-acetyltransferase 8B                                             | -0.07033 | 0.213130897 | 0.289056113 |
| NAT9     | N-acetyltransferase 9                                              | 0.63421  | 2.36E-05    | 7.51E-05    |
| NDOR1    | NADPH dependent diflavin oxidoreductase 1                          | -0.15713 | 0.06727927  | 0.106359841 |
| NDST1    | N-deacetylase/N-sulfotransferase (heparan glucosaminyl) 1          | -0.20399 | 0.015532919 | 0.02873378  |
| NDST2    | N-deacetylase/N-sulfotransferase (heparan glucosaminyl) 2          | -0.62875 | 9.31E-06    | 3.16E-05    |
| NDST3    | N-deacetylase/N-sulfotransferase (heparan glucosaminyl) 3          | -1.78911 | 6.76E-29    | 1.70E-27    |
| NDST4    | N-deacetylase/N-sulfotransferase (heparan glucosaminyl) 4          | -0.29322 | 0.037731738 | 0.063923853 |
| NDUFA1   | NADH dehydrogenase (ubiquinone) 1 alpha subcomplex, 1, 7.5kDa      | -0.33107 | 0.006929947 | 0.013866716 |
| NDUFA10  | NADH dehydrogenase (ubiquinone) 1 alpha subcomplex, 10, 42kDa      | -0.64991 | 2.40E-07    | 1.06E-06    |
| NDUFA13  | NADH dehydrogenase (ubiquinone) 1 alpha subcomplex, 13             | -0.00855 | 0.957793675 | 0.971303447 |
| NDUFA2   | NADH dehydrogenase (ubiquinone) 1 alpha subcomplex, 2, 8kDa        | 0.08880  | 0.594264252 | 0.680258573 |

|          |                                                                                   |          |             |             |
|----------|-----------------------------------------------------------------------------------|----------|-------------|-------------|
| NDUFA3   | NADH dehydrogenase (ubiquinone) 1 alpha subcomplex, 3, 9kDa                       | -0.51224 | 0.002629183 | 0.005759838 |
| NDUFA4   | NADH dehydrogenase (ubiquinone) 1 alpha subcomplex, 4, 9kDa                       | -0.38831 | 0.004569108 | 0.00948825  |
| NDUFA4L2 | NADH dehydrogenase (ubiquinone) 1 alpha subcomplex, 4-like 2                      | 1.14748  | 0.000155676 | 4.35E-04    |
| NDUFA5   | NADH dehydrogenase (ubiquinone) 1 alpha subcomplex, 5, 13kDa                      | -0.02652 | 0.783619417 | 0.839356309 |
| NDUFA6   | NADH dehydrogenase (ubiquinone) 1 alpha subcomplex, 6, 14kDa                      | -0.20477 | 0.184880166 | 0.254821273 |
| NDUFA7   | NADH dehydrogenase (ubiquinone) 1 alpha subcomplex, 7, 14.5kDa                    | 0.38255  | 0.030862524 | 0.053353325 |
| NDUFA8   | NADH dehydrogenase (ubiquinone) 1 alpha subcomplex, 8, 19kDa                      | -0.83192 | 7.40E-09    | 4.01E-08    |
| NDUFA9   | NADH dehydrogenase (ubiquinone) 1 alpha subcomplex, 9, 39kDa                      | 0.02357  | 0.882866881 | 0.919502239 |
| NDUFAB1  | NADH dehydrogenase (ubiquinone) 1, alpha/beta subcomplex, 1, 8kDa                 | -0.57405 | 5.82E-05    | 1.73E-04    |
| NDUFAF1  | NADH dehydrogenase (ubiquinone) 1 alpha subcomplex, assembly factor 1             | -0.48095 | 0.000422689 | 0.001091902 |
| NDUFB1   | NADH dehydrogenase (ubiquinone) 1 beta subcomplex, 1, 7kDa                        | -0.06746 | 0.642905756 | 0.720919692 |
| NDUFB11  | NADH dehydrogenase (ubiquinone) 1 beta subcomplex, 11, 17.3kDa                    | -0.14364 | 0.258363242 | 0.342630444 |
| NDUFB2   | NADH dehydrogenase (ubiquinone) 1 beta subcomplex, 2, 8kDa                        | 0.11079  | 0.402047653 | 0.493576617 |
| NDUFB3   | NADH dehydrogenase (ubiquinone) 1 beta subcomplex, 3, 12kDa                       | -0.27281 | 0.022819842 | 0.040982985 |
| NDUFB4   | NADH dehydrogenase (ubiquinone) 1 beta subcomplex, 4, 12kDa                       | -0.20569 | 0.069595497 | 0.109680345 |
| NDUFB5   | NADH dehydrogenase (ubiquinone) 1 beta subcomplex, 5, 16kDa                       | 0.11647  | 0.451504233 | 0.543784422 |
| NDUFB6   | NADH dehydrogenase (ubiquinone) 1 beta subcomplex, 6, 17kDa                       | -0.11375 | 0.486425174 | 0.577629894 |
| NDUFB7   | NADH dehydrogenase (ubiquinone) 1 beta subcomplex, 7, 18kDa                       | 0.10744  | 0.340644524 | 0.431752068 |
| NDUFB8   | NADH dehydrogenase (ubiquinone) 1 beta subcomplex, 8, 19kDa                       | -0.95072 | 2.44E-16    | 2.74E-15    |
| NDUFC1   | NADH dehydrogenase (ubiquinone) 1, subcomplex unknown, 1, 6kDa                    | 0.01449  | 0.894113431 | 0.928640313 |
| NDUFC2   | NADH dehydrogenase (ubiquinone) 1, subcomplex unknown, 2, 14.5kDa                 | -0.08574 | 0.44209661  | 0.533907463 |
| NDUFS1   | NADH dehydrogenase (ubiquinone) Fe-S protein 1, 75kDa (NADH-coenzyme Q reductase) | -0.54530 | 2.12E-07    | 9.49E-07    |
| NDUFS2   | NADH dehydrogenase (ubiquinone) Fe-S protein 2, 49kDa (NADH-coenzyme Q reductase) | -0.53794 | 4.52E-06    | 1.63E-05    |
| NDUFS3   | NADH dehydrogenase (ubiquinone) Fe-S protein 3, 30kDa (NADH-coenzyme Q reductase) | -0.35471 | 0.012562692 | 0.023736015 |
| NDUFS4   | NADH dehydrogenase (ubiquinone) Fe-S protein 4, 18kDa (NADH-coenzyme Q reductase) | -0.16486 | 0.332956811 | 0.424123557 |

|        |                                                                                   |          |             |             |
|--------|-----------------------------------------------------------------------------------|----------|-------------|-------------|
| NDUFS6 | NADH dehydrogenase (ubiquinone) Fe-S protein 6, 13kDa (NADH-coenzyme Q reductase) | 0.29212  | 0.023995509 | 0.042754487 |
| NDUFS7 | NADH dehydrogenase (ubiquinone) Fe-S protein 7, 20kDa (NADH-coenzyme Q reductase) | -0.06810 | 0.689405485 | 0.760478215 |
| NDUFS8 | NADH dehydrogenase (ubiquinone) Fe-S protein 8, 23kDa (NADH-coenzyme Q reductase) | 0.04237  | 0.782596026 | 0.839290356 |
| NDUFV1 | NADH dehydrogenase (ubiquinone) flavoprotein 1, 51kDa                             | -0.75292 | 6.41E-09    | 3.56E-08    |
| NDUFV2 | NADH dehydrogenase (ubiquinone) flavoprotein 2, 24kDa                             | 0.01348  | 0.919212527 | 0.943998273 |
| NEU1   | sialidase 1 (lysosomal sialidase)                                                 | 0.82919  | 0.000115248 | 3.28E-04    |
| NEU2   | sialidase 2 (cytosolic sialidase)                                                 | -0.06603 | 0.312800888 | 0.402229098 |
| NEU3   | sialidase 3 (membrane sialidase)                                                  | -0.18054 | 0.000299256 | 0.000795277 |
| NFS1   | NFS1 nitrogen fixation 1 homolog ( <i>S. cerevisiae</i> )                         | -0.44406 | 0.003382121 | 0.007192313 |
| NIT1   | nitrilase 1                                                                       | -0.07067 | 0.567729639 | 0.655792248 |
| NIT2   | nitrilase family, member 2                                                        | 0.08992  | 0.682656243 | 0.754260947 |
| NME1   | non-metastatic cells 1, protein (NM23A) expressed in                              | 0.30660  | 0.104894732 | 0.155885227 |
| NME3   | non-metastatic cells 3, protein expressed in                                      | 0.44118  | 0.030689715 | 0.053099736 |
| NME4   | non-metastatic cells 4, protein expressed in                                      | 1.18873  | 9.40E-12    | 7.11E-11    |
| NME5   | non-metastatic cells 5, protein expressed in (nucleoside-diphosphate kinase)      | -1.30391 | 8.05E-05    | 2.34E-04    |
| NME6   | non-metastatic cells 6, protein expressed in (nucleoside-diphosphate kinase)      | 1.00642  | 2.15E-11    | 1.58E-10    |
| NME7   | non-metastatic cells 7, protein expressed in (nucleoside-diphosphate kinase)      | 0.37573  | 0.043178213 | 0.072247989 |
| NMNAT2 | nicotinamide nucleotide adenyltransferase 2                                       | -4.30971 | 1.27E-25    | 2.66E-24    |
| NNMT   | nicotinamide N-methyltransferase                                                  | 3.03010  | 3.96E-06    | 1.45E-05    |
| NNT    | nicotinamide nucleotide transhydrogenase                                          | -0.09042 | 0.644444764 | 0.722247081 |
| NOS1   | nitric oxide synthase 1 (neuronal)                                                | -0.24996 | 7.44E-05    | 0.000217539 |
| NOS2   | Nitric oxide synthase 2 (inducible, hepatocytes)                                  | 0.20085  | 0.269801634 | 0.353875304 |
| NOS3   | nitric oxide synthase 3 (endothelial cell)                                        | 0.08810  | 0.153315655 | 0.216767419 |
| NOX1   | NADPH oxidase 1                                                                   | -0.24499 | 0.019898925 | 3.60E-02    |
| NOX3   | NADPH oxidase 3                                                                   | 0.00740  | 0.898740978 | 0.93079016  |

|        |                                                                                          |          |             |             |
|--------|------------------------------------------------------------------------------------------|----------|-------------|-------------|
| NOX4   | NADPH oxidase 4                                                                          | 1.47808  | 7.75E-07    | 3.20E-06    |
| NOX5   | NADPH oxidase, EF-hand calcium binding domain 5                                          | -0.41949 | 2.07E-06    | 7.97E-06    |
| NPC1   | Niemann-Pick disease, type C1                                                            | 0.13473  | 0.202070006 | 0.274972103 |
| NPC1L1 | NPC1 (Niemann-Pick disease, type C1, gene)-like 1                                        | -0.13338 | 0.028362375 | 0.049836394 |
| NPC2   | Niemann-Pick disease, type C2                                                            | 1.86888  | 5.79E-13    | 4.95E-12    |
| NPL    | N-acetylneuraminate pyruvate lyase (dihydrodipicolinate synthase)                        | 2.25179  | 2.22E-11    | 1.63E-10    |
| NPR1   | natriuretic peptide receptor A/guanylate cyclase A (atrionatriuretic peptide receptor A) | -0.21966 | 0.092027144 | 0.13951617  |
| NPR2   | natriuretic peptide receptor B/guanylate cyclase B (atrionatriuretic peptide receptor B) | -0.00446 | 0.972290968 | 0.981463525 |
| NPR3   | natriuretic peptide receptor C/guanylate cyclase C (atrionatriuretic peptide receptor C) | 0.07793  | 0.732798928 | 0.797100171 |
| NQO1   | NAD(P)H dehydrogenase, quinone 1                                                         | -0.18290 | 0.626043658 | 0.705513723 |
| NQO2   | NAD(P)H dehydrogenase, quinone 2                                                         | -0.34172 | 0.093715202 | 0.141652792 |
| NSDHL  | NAD(P) dependent steroid dehydrogenase-like                                              | 0.02804  | 0.845012749 | 0.890109284 |
| NT5C2  | 5'-nucleotidase, cytosolic II                                                            | 0.15272  | 0.313597931 | 0.402999111 |
| NT5DC2 | 5'-nucleotidase domain containing 2                                                      | 2.15092  | 3.76E-13    | 3.25E-12    |
| NT5DC3 | 5'-nucleotidase domain containing 3                                                      | -1.83193 | 1.48E-14    | 1.43E-13    |
| NT5E   | 5'-nucleotidase, ecto (CD73)                                                             | 0.91142  | 0.029166572 | 5.09E-02    |
| NT5M   | 5',3'-nucleotidase, mitochondrial                                                        | -0.20068 | 0.166496812 | 0.232318475 |
| NUDT1  | nudix (nucleoside diphosphate linked moiety X)-type motif 1                              | 1.82887  | 9.19E-17    | 1.06E-15    |
| NUDT11 | nudix (nucleoside diphosphate linked moiety X)-type motif 11                             | -1.67641 | 6.30E-06    | 2.22E-05    |
| NUDT13 | nudix (nucleoside diphosphate linked moiety X)-type motif 13                             | 0.04358  | 0.620383514 | 0.700299658 |
| NUDT15 | nudix (nucleoside diphosphate linked moiety X)-type motif 15                             | 0.24597  | 0.169092883 | 0.234973228 |
| NUDT18 | nudix (nucleoside diphosphate linked moiety X)-type motif 18                             | -0.32034 | 0.009601915 | 0.018627474 |
| NUDT2  | nudix (nucleoside diphosphate linked moiety X)-type motif 2                              | -0.34502 | 0.174799081 | 0.242075295 |
| NUDT21 | nudix (nucleoside diphosphate linked moiety X)-type motif 21                             | 0.74217  | 0.000844012 | 0.002037858 |
| NUDT3  | nudix (nucleoside diphosphate linked moiety X)-type motif 3                              | -0.38855 | 0.015784343 | 2.92E-02    |

|        |                                                                 |          |             |             |
|--------|-----------------------------------------------------------------|----------|-------------|-------------|
| NUDT4  | nudix (nucleoside diphosphate linked moiety X)-type motif 4     | -0.23823 | 0.282947865 | 0.368739109 |
| NUDT6  | nudix (nucleoside diphosphate linked moiety X)-type motif 6     | 0.00845  | 0.965825278 | 0.976391243 |
| NUDT7  | nudix (nucleoside diphosphate linked moiety X)-type motif 7     | -0.18971 | 0.003497081 | 0.00741352  |
| NUDT9  | nudix (nucleoside diphosphate linked moiety X)-type motif 9     | -0.12839 | 0.278603157 | 0.364010424 |
| OAS1   | 2',5'-oligoadenylate synthetase 1, 40/46kDa                     | 1.20188  | 0.001456606 | 3.35E-03    |
| OAS2   | 2'-5'-oligoadenylate synthetase 2, 69/71kDa                     | 0.48085  | 0.01837905  | 3.35E-02    |
| OAS3   | 2'-5'-oligoadenylate synthetase 3, 100kDa                       | 1.48042  | 1.45E-05    | 4.78E-05    |
| OASL   | 2'-5'-oligoadenylate synthetase-like                            | 0.43601  | 0.091249973 | 1.39E-01    |
| OAT    | ornithine aminotransferase (gyrate atrophy)                     | -1.14752 | 6.95E-11    | 4.87E-10    |
| OCA2   | Oculocutaneous albinism II (pink-eye dilution homolog, mouse)   | -1.48626 | 4.14E-24    | 7.93E-23    |
| ODC1   | ornithine decarboxylase 1                                       | 1.24521  | 5.62E-08    | 2.73E-07    |
| OGDH   | oxoglutarate (alpha-ketoglutarate) dehydrogenase (lipoamide)    | -0.12642 | 0.518842481 | 0.608308399 |
| OGDHL  | oxoglutarate dehydrogenase-like                                 | -2.42233 | 3.12E-24    | 6.09E-23    |
| OGFOD1 | 2-oxoglutarate and iron-dependent oxygenase domain containing 1 | 0.36975  | 0.009602358 | 0.018627474 |
| OGFOD2 | 2-oxoglutarate and iron-dependent oxygenase domain containing 2 | 0.09331  | 0.376012752 | 0.467829819 |
| OLAH   | oleoyl-ACP hydrolase                                            | 0.12036  | 0.058356107 | 0.093710873 |
| ORAI2  | ORAI calcium release-activated calcium modulator 2              | -0.16687 | 0.414460754 | 0.505155104 |
| ORAI3  | ORAI calcium release-activated calcium modulator 3              | 0.77890  | 9.84E-06    | 3.33E-05    |
| OTC    | ornithine carbamoyltransferase                                  | 0.05667  | 0.220724958 | 0.298360265 |
| OXA1L  | oxidase (cytochrome c) assembly 1-like                          | 0.52483  | 0.001193466 | 2.80E-03    |
| OXCT1  | 3-oxoacid CoA transferase 1                                     | -1.54641 | 1.03E-15    | 1.09E-14    |
| OXCT2  | 3-oxoacid CoA transferase 2                                     | -0.59061 | 1.27E-12    | 1.04E-11    |
| OXSM   | 3-oxoacyl-ACP synthase, mitochondrial                           | 1.03865  | 9.27E-09    | 4.95E-08    |
| P2RX1  | purinergic receptor P2X, ligand-gated ion channel, 1            | -0.28885 | 0.000307562 | 0.000816285 |
| P2RX2  | purinergic receptor P2X, ligand-gated ion channel, 2            | -0.19035 | 0.001047024 | 0.002480886 |

|         |                                                                                                      |          |             |             |
|---------|------------------------------------------------------------------------------------------------------|----------|-------------|-------------|
| P2RX3   | purinergic receptor P2X, ligand-gated ion channel, 3                                                 | -0.03372 | 0.430066249 | 0.521362364 |
| P2RX4   | purinergic receptor P2X, ligand-gated ion channel, 4                                                 | 0.95612  | 2.07E-06    | 7.97E-06    |
| P2RX5   | purinergic receptor P2X, ligand-gated ion channel, 5                                                 | -2.44764 | 1.59E-29    | 4.10E-28    |
| P2RX6   | purinergic receptor P2X, ligand-gated ion channel, 6                                                 | -0.27910 | 2.57E-05    | 8.16E-05    |
| P2RX7   | purinergic receptor P2X, ligand-gated ion channel, 7                                                 | 0.49619  | 0.03767225  | 0.063876301 |
| PAH     | phenylalanine hydroxylase                                                                            | -0.50834 | 0.000127173 | 0.000359586 |
| PAICS   | phosphoribosylaminoimidazole carboxylase, phosphoribosylaminoimidazole succinocarboxamide synthetase | 1.56793  | 9.25E-09    | 4.95E-08    |
| PAM     | peptidylglycine alpha-amidating monooxygenase                                                        | 0.37925  | 0.061369803 | 0.097854753 |
| PANK2   | pantothenate kinase 2 (Hallervorden-Spatz syndrome)                                                  | -0.35340 | 0.004210674 | 0.008815962 |
| PANK3   | pantothenate kinase 3                                                                                | -0.26321 | 0.031175541 | 0.053848662 |
| PANK4   | pantothenate kinase 4                                                                                | -0.50522 | 0.000618572 | 1.54E-03    |
| PAOX    | polyamine oxidase (exo-N4-amino)                                                                     | -0.85030 | 3.93E-15    | 3.93E-14    |
| PAPSS1  | 3'-phosphoadenosine 5'-phosphosulfate synthase 1                                                     | -0.08601 | 0.538699345 | 0.628328037 |
| PAPSS2  | 3'-phosphoadenosine 5'-phosphosulfate synthase 2                                                     | 1.01291  | 0.000148513 | 4.15E-04    |
| PC      | pyruvate carboxylase                                                                                 | -1.02542 | 8.66E-08    | 4.08E-07    |
| PCBD1   | pterin-4 alpha-carbinolamine dehydratase/dimerization cofactor of hepatocyte nuclear factor 1 alpha  | -0.28987 | 0.1892975   | 0.259502237 |
| PCCA    | propionyl Coenzyme A carboxylase, alpha polypeptide                                                  | -0.14628 | 0.142315651 | 0.203895503 |
| PCCB    | Propionyl Coenzyme A carboxylase, beta polypeptide                                                   | 0.37687  | 0.049800229 | 0.081582486 |
| PCK1    | phosphoenolpyruvate carboxykinase 1 (soluble)                                                        | -0.37567 | 0.097873267 | 0.147063083 |
| PCK2    | phosphoenolpyruvate carboxykinase 2 (mitochondrial)                                                  | 0.66157  | 0.008092379 | 1.59E-02    |
| PCTP    | Phosphatidylcholine transfer protein                                                                 | 0.87072  | 4.06E-06    | 1.48E-05    |
| PCYOX1  | prenylcysteine oxidase 1                                                                             | 0.25050  | 0.228361629 | 0.30704973  |
| PCYOX1L | prenylcysteine oxidase 1 like                                                                        | -1.18576 | 9.86E-11    | 6.71E-10    |
| PCYT1A  | phosphate cytidylyltransferase 1, choline, alpha                                                     | 0.16423  | 0.144228281 | 0.206344894 |
| PCYT1B  | phosphate cytidylyltransferase 1, choline, beta                                                      | -0.26681 | 0.000262511 | 0.000702217 |

|        |                                                                                                              |          |             |             |
|--------|--------------------------------------------------------------------------------------------------------------|----------|-------------|-------------|
| PCYT2  | phosphate cytidylyltransferase 2, ethanolamine                                                               | -0.74598 | 8.74E-06    | 2.98E-05    |
| PDE10A | phosphodiesterase 10A                                                                                        | 0.06421  | 0.369161887 | 0.461282186 |
| PDE11A | phosphodiesterase 11A                                                                                        | -0.03125 | 0.625013329 | 0.70474326  |
| PDE12  | 2'-phosphodiesterase                                                                                         | -0.27748 | 3.74E-05    | 0.000114788 |
| PDE1A  | phosphodiesterase 1A, calmodulin-dependent                                                                   | -3.25616 | 1.69E-28    | 4.05E-27    |
| PDE1B  | phosphodiesterase 1B, calmodulin-dependent                                                                   | -0.95065 | 2.19E-30    | 5.94E-29    |
| PDE1C  | phosphodiesterase 1C, calmodulin-dependent 70kDa                                                             | -0.31442 | 0.037027208 | 0.062887481 |
| PDE2A  | phosphodiesterase 2A, cGMP-stimulated                                                                        | -3.75366 | 3.99E-40    | 2.03E-38    |
| PDE3A  | phosphodiesterase 3A, cGMP-inhibited                                                                         | -0.11700 | 0.058972422 | 0.094551211 |
| PDE3B  | phosphodiesterase 3B, cGMP-inhibited                                                                         | -0.15506 | 0.205343898 | 0.279240231 |
| PDE4A  | phosphodiesterase 4A, cAMP-specific (phosphodiesterase E2 dunce homolog, Drosophila)                         | -0.31612 | 2.65E-06    | 1.01E-05    |
| PDE4B  | phosphodiesterase 4B, cAMP-specific (phosphodiesterase E4 dunce homolog, Drosophila)                         | 0.54460  | 0.139861772 | 0.201658853 |
| PDE4C  | phosphodiesterase 4C, cAMP-specific (phosphodiesterase E1 dunce homolog, Drosophila)                         | -0.42022 | 2.37E-07    | 1.05E-06    |
| PDE4D  | phosphodiesterase 4D, cAMP-specific (phosphodiesterase E3 dunce homolog, Drosophila)                         | -0.04274 | 0.650289913 | 0.727995261 |
| PDE5A  | phosphodiesterase 5A, cGMP-specific                                                                          | -0.03609 | 0.59213616  | 0.678969438 |
| PDE6A  | phosphodiesterase 6A, cGMP-specific, rod, alpha                                                              | -0.15328 | 0.040722421 | 0.068704301 |
| PDE6B  | phosphodiesterase 6B, cGMP-specific, rod, beta (congenital stationary night blindness 3, autosomal dominant) | 0.00064  | 0.994654787 | 0.995393773 |
| PDE6C  | phosphodiesterase 6C, cGMP-specific, cone, alpha prime                                                       | -0.13279 | 0.01037787  | 0.019941597 |
| PDE6D  | phosphodiesterase 6D, cGMP-specific, rod, delta                                                              | -0.14994 | 0.328585526 | 0.419343613 |
| PDE6G  | phosphodiesterase 6G, cGMP-specific, rod, gamma                                                              | -0.10363 | 0.227054549 | 0.306102055 |
| PDE6H  | phosphodiesterase 6H, cGMP-specific, cone, gamma                                                             | -0.20644 | 1.72E-05    | 5.61E-05    |
| PDE7B  | phosphodiesterase 7B                                                                                         | -0.17212 | 0.01325948  | 0.024844721 |
| PDE8A  | phosphodiesterase 8A                                                                                         | 0.08901  | 0.654627946 | 0.732045442 |
| PDE8B  | phosphodiesterase 8B                                                                                         | -1.33875 | 0.000764042 | 1.86E-03    |
| PDE9A  | phosphodiesterase 9A                                                                                         | 0.48756  | 0.031353428 | 0.054109948 |



|        |                                                                  |          |             |             |
|--------|------------------------------------------------------------------|----------|-------------|-------------|
| PDHA1  | pyruvate dehydrogenase (lipoamide) alpha 1                       | -0.82737 | 6.92E-11    | 4.87E-10    |
| PDHA2  | pyruvate dehydrogenase (lipoamide) alpha 2                       | -0.16106 | 0.006600828 | 0.013273475 |
| PDHB   | pyruvate dehydrogenase (lipoamide) beta                          | -0.27071 | 0.013671952 | 0.025546947 |
| PDHX   | pyruvate dehydrogenase complex, component X                      | -0.51453 | 0.000122768 | 3.48E-04    |
| PDSS1  | prenyl (decaprenyl) diphosphate synthase, subunit 1              | 0.57922  | 0.004398444 | 0.009152545 |
| PDSS2  | prenyl (decaprenyl) diphosphate synthase, subunit 2              | 0.71908  | 3.13E-05    | 9.73E-05    |
| PDXK   | pyridoxal (pyridoxine, vitamin B6) kinase                        | -0.62249 | 1.67E-05    | 5.46E-05    |
| PECR   | peroxisomal trans-2-enoyl-CoA reductase                          | 0.28787  | 0.093356616 | 0.141215774 |
| PEMT   | phosphatidylethanolamine N-methyltransferase                     | 0.28346  | 0.064497996 | 0.102360988 |
| PFAS   | phosphoribosylformylglycinamide synthase (FGAR amidotransferase) | 0.32468  | 0.081127981 | 0.125807159 |
| PFKFB1 | 6-phosphofructo-2-kinase/fructose-2,6-biphosphatase 1            | -0.06766 | 0.269298976 | 0.353738086 |
| PFKFB2 | 6-phosphofructo-2-kinase/fructose-2,6-biphosphatase 2            | 0.16908  | 0.174302633 | 0.241552319 |
| PFKFB3 | 6-phosphofructo-2-kinase/fructose-2,6-biphosphatase 3            | 0.38226  | 0.144931698 | 0.207205445 |
| PFKFB4 | 6-phosphofructo-2-kinase/fructose-2,6-biphosphatase 4            | 0.10675  | 0.12534883  | 0.183202136 |
| PFKL   | phosphofructokinase, liver                                       | 0.23857  | 0.087077859 | 0.133204881 |
| PFKM   | phosphofructokinase, muscle                                      | -0.96408 | 3.93E-07    | 1.67E-06    |
| PFKP   | phosphofructokinase, platelet                                    | -1.54216 | 9.81E-11    | 6.69E-10    |
| PGAM1  | phosphoglycerate mutase 1 (brain)                                | -1.06060 | 1.61E-17    | 1.92E-16    |
| PGAM2  | phosphoglycerate mutase 2 (muscle)                               | 0.36338  | 0.351025657 | 0.44360354  |
| PGAP1  | GPI deacylase                                                    | 0.37087  | 0.151686265 | 0.215047543 |
| PGD    | phosphogluconate dehydrogenase                                   | 0.95800  | 4.18E-05    | 1.27E-04    |
| PGK1   | phosphoglycerate kinase 1                                        | 0.68988  | 0.010139075 | 1.95E-02    |
| PGK2   | phosphoglycerate kinase 2                                        | -0.13817 | 0.021225123 | 0.038152675 |
| PGLS   | 6-phosphogluconolactonase                                        | 1.23382  | 5.04E-18    | 6.22E-17    |
| PGM1   | phosphoglucomutase 1                                             | 0.32802  | 0.035952688 | 0.061164699 |

|         |                                                                                                |          |             |             |
|---------|------------------------------------------------------------------------------------------------|----------|-------------|-------------|
| PGM3    | phosphoglucomutase 3                                                                           | 0.92346  | 7.84E-07    | 3.23E-06    |
| PGM5    | phosphoglucomutase 5                                                                           | -0.40923 | 1.00E-06    | 4.07E-06    |
| PGS1    | phosphatidylglycerophosphate synthase 1                                                        | -0.31262 | 0.011159892 | 0.021283358 |
| PHGDH   | phosphoglycerate dehydrogenase                                                                 | 0.02896  | 0.917835978 | 0.943998273 |
| PHYH    | phytanoyl-CoA 2-hydroxylase                                                                    | -0.10580 | 0.662799857 | 0.738888946 |
| PI4K2A  | phosphatidylinositol 4-kinase type 2 alpha                                                     | -0.73808 | 2.81E-13    | 2.46E-12    |
| PI4KA   | phosphatidylinositol 4-kinase, catalytic, alpha                                                | -2.70169 | 2.63E-32    | 8.36E-31    |
| PI4KB   | phosphatidylinositol 4-kinase, catalytic, beta                                                 | 0.06357  | 0.689294549 | 0.760478215 |
| PIGA    | phosphatidylinositol glycan anchor biosynthesis, class A (paroxysmal nocturnal hemoglobinuria) | 0.43448  | 0.002315546 | 0.005139197 |
| PIGB    | phosphatidylinositol glycan anchor biosynthesis, class B                                       | 0.54170  | 0.017346981 | 0.031857644 |
| PIGC    | phosphatidylinositol glycan anchor biosynthesis, class C                                       | 0.64852  | 0.001741853 | 3.96E-03    |
| PIGF    | phosphatidylinositol glycan anchor biosynthesis, class F                                       | 0.76744  | 1.70E-06    | 6.62E-06    |
| PIGG    | phosphatidylinositol glycan anchor biosynthesis, class G                                       | 0.77475  | 1.01E-06    | 4.09E-06    |
| PIGH    | phosphatidylinositol glycan anchor biosynthesis, class H                                       | 0.09225  | 0.601092185 | 0.68498902  |
| PIGK    | phosphatidylinositol glycan anchor biosynthesis, class K                                       | -0.03905 | 0.790417807 | 0.844413769 |
| PIGL    | phosphatidylinositol glycan anchor biosynthesis, class L                                       | 0.21863  | 0.048622167 | 0.080039567 |
| PIGN    | phosphatidylinositol glycan anchor biosynthesis, class N                                       | 1.22847  | 7.78E-12    | 5.95E-11    |
| PIGO    | phosphatidylinositol glycan anchor biosynthesis, class O                                       | 0.29490  | 0.013156081 | 0.024719081 |
| PIGP    | phosphatidylinositol glycan anchor biosynthesis, class P                                       | -0.18816 | 0.319085737 | 0.40927527  |
| PIGQ    | phosphatidylinositol glycan anchor biosynthesis, class Q                                       | -0.22021 | 0.005698709 | 0.011573901 |
| PIGT    | phosphatidylinositol glycan anchor biosynthesis, class T                                       | 0.76927  | 1.61E-07    | 7.24E-07    |
| PIGV    | phosphatidylinositol glycan anchor biosynthesis, class V                                       | 0.03718  | 0.801881108 | 0.853073936 |
| PIGZ    | phosphatidylinositol glycan anchor biosynthesis, class Z                                       | -2.18856 | 3.68E-22    | 6.18E-21    |
| PIK3C2A | phosphoinositide-3-kinase, class 2, alpha polypeptide                                          | 0.66247  | 0.001386253 | 3.21E-03    |
| PIK3C2B | phosphoinositide-3-kinase, class 2, beta polypeptide                                           | -0.44972 | 0.13475085  | 0.195537815 |

|         |                                                              |          |             |             |
|---------|--------------------------------------------------------------|----------|-------------|-------------|
| PIK3C2G | phosphoinositide-3-kinase, class 2, gamma polypeptide        | -0.13528 | 0.128222762 | 0.186923986 |
| PIK3C3  | phosphoinositide-3-kinase, class 3                           | 0.46266  | 7.52E-11    | 5.22E-10    |
| PIK3CA  | phosphoinositide-3-kinase, catalytic, alpha polypeptide      | 0.85115  | 0.001481008 | 0.003398296 |
| PIK3CB  | phosphoinositide-3-kinase, catalytic, beta polypeptide       | -0.61806 | 1.79E-08    | 9.21E-08    |
| PIK3CD  | phosphoinositide-3-kinase, catalytic, delta polypeptide      | -0.13720 | 0.265457714 | 0.350211247 |
| PIK3CG  | phosphoinositide-3-kinase, catalytic, gamma polypeptide      | 0.15589  | 0.019194119 | 0.034934327 |
| PIK3R1  | phosphoinositide-3-kinase, regulatory subunit 1 (p85 alpha)  | -0.86548 | 0.002975751 | 6.42E-03    |
| PIK3R2  | phosphoinositide-3-kinase, regulatory subunit 2 (p85 beta)   | -0.38293 | 0.000675722 | 0.001667163 |
| PIK3R3  | phosphoinositide-3-kinase, regulatory subunit 3 (p55, gamma) | -0.17581 | 0.314171107 | 4.03E-01    |
| PIK3R4  | phosphoinositide-3-kinase, regulatory subunit 4, p150        | 0.01394  | 0.795129318 | 0.847221124 |
| PIK3R5  | phosphoinositide-3-kinase, regulatory subunit 5, p101        | 0.14334  | 0.08510515  | 0.130580203 |
| PIP4K2A | phosphatidylinositol-5-phosphate 4-kinase, type II, alpha    | -1.22311 | 1.79E-09    | 1.07E-08    |
| PIP4K2B | phosphatidylinositol-5-phosphate 4-kinase, type II, beta     | -1.01768 | 1.23E-15    | 1.27E-14    |
| PIP4K2C | phosphatidylinositol-5-phosphate 4-kinase, type II, gamma    | -1.17723 | 1.41E-06    | 5.59E-06    |
| PIP5K1A | phosphatidylinositol-4-phosphate 5-kinase, type I, alpha     | -0.01131 | 0.934320504 | 0.954989233 |
| PIP5K1B | phosphatidylinositol-4-phosphate 5-kinase, type I, beta      | -1.08829 | 3.96E-10    | 2.52E-09    |
| PIP5K1C | phosphatidylinositol-4-phosphate 5-kinase, type I, gamma     | -1.56926 | 7.04E-18    | 8.58E-17    |
| PIPOX   | pipecolic acid oxidase                                       | 1.28281  | 0.009415777 | 1.84E-02    |
| PISD    | phosphatidylserine decarboxylase                             | -0.74980 | 2.33E-07    | 1.03E-06    |
| PKD1    | Polycystic kidney disease 1 (autosomal dominant)             | -0.46682 | 3.00E-05    | 9.37E-05    |
| PKD2    | Polycystic kidney disease 2 (autosomal dominant)             | 0.74108  | 0.000157073 | 4.38E-04    |
| PKD2L1  | Polycystic kidney disease 2-like 1                           | -0.32245 | 0.000576824 | 0.001447241 |
| PKLR    | pyruvate kinase, liver and RBC                               | -0.08290 | 0.034299644 | 0.058548426 |
| PLA1A   | phospholipase A1 member A                                    | -0.15650 | 0.394239768 | 0.48474789  |
| PLA2G10 | phospholipase A2, group X                                    | -0.06362 | 0.615789303 | 0.697182001 |

|          |                                                                                  |          |             |             |
|----------|----------------------------------------------------------------------------------|----------|-------------|-------------|
| PLA2G12A | phospholipase A2, group XIIA                                                     | 0.78227  | 1.54E-06    | 6.03E-06    |
| PLA2G15  | phospholipase A2, group XV                                                       | -0.03776 | 0.791864208 | 0.845070832 |
| PLA2G16  | phospholipase A2, group XVI                                                      | -0.38234 | 0.157090385 | 0.221319994 |
| PLA2G1B  | phospholipase A2, group IB (pancreas)                                            | 0.01169  | 0.923573695 | 0.94596999  |
| PLA2G2A  | phospholipase A2, group IIA (platelets, synovial fluid)                          | 2.10193  | 0.003653391 | 7.74E-03    |
| PLA2G2D  | phospholipase A2, group IID                                                      | 0.14188  | 0.161198922 | 0.225911142 |
| PLA2G2E  | phospholipase A2, group IIE                                                      | -0.03928 | 0.511725457 | 0.604496138 |
| PLA2G2F  | phospholipase A2, group IIF                                                      | -0.22379 | 0.000565821 | 0.001423656 |
| PLA2G3   | phospholipase A2, group III                                                      | -0.43041 | 3.03E-06    | 1.14E-05    |
| PLA2G4A  | phospholipase A2, group IVA (cytosolic, calcium-dependent)                       | 1.67359  | 1.01E-05    | 3.40E-05    |
| PLA2G4C  | phospholipase A2, group IVC (cytosolic, calcium-independent)                     | -1.26748 | 1.92E-05    | 6.20E-05    |
| PLA2G5   | phospholipase A2, group V                                                        | 0.76768  | 0.193699398 | 2.65E-01    |
| PLA2G6   | phospholipase A2, group VI (cytosolic, calcium-independent)                      | -0.84699 | 4.47E-15    | 4.45E-14    |
| PLA2G7   | phospholipase A2, group VII (platelet-activating factor acetylhydrolase, plasma) | 0.01551  | 0.952620582 | 0.968338822 |
| PLCB1    | phospholipase C, beta 1 (phosphoinositide-specific)                              | -1.29114 | 3.65E-19    | 4.88E-18    |
| PLCB2    | phospholipase C, beta 2                                                          | -0.11231 | 0.082159831 | 0.127213204 |
| PLCB3    | phospholipase C, beta 3 (phosphatidylinositol-specific)                          | 0.19248  | 0.03185177  | 0.054691426 |
| PLCB4    | phospholipase C, beta 4                                                          | -1.13290 | 1.87E-05    | 6.05E-05    |
| PLCD1    | phospholipase C, delta 1                                                         | 0.54688  | 0.016050332 | 0.029636989 |
| PLCE1    | Phospholipase C, epsilon 1                                                       | 0.73639  | 0.00270044  | 0.005896879 |
| PLCG1    | phospholipase C, gamma 1                                                         | 0.24594  | 0.083387064 | 0.128819074 |
| PLCG2    | Phospholipase C, gamma 2 (phosphatidylinositol-specific)                         | 0.63772  | 0.020578323 | 0.037055563 |
| PLCH1    | phospholipase C, eta 1                                                           | -0.42576 | 1.19E-15    | 1.24E-14    |
| PLCH2    | phospholipase C, eta 2                                                           | -0.56065 | 2.96E-10    | 1.93E-09    |
| PLCL1    | phospholipase C-like 1                                                           | -0.88286 | 0.000158615 | 4.42E-04    |

|          |                                                                      |          |             |             |
|----------|----------------------------------------------------------------------|----------|-------------|-------------|
| PLCL2    | phospholipase C-like 2                                               | -1.32164 | 3.71E-14    | 3.47E-13    |
| PLCXD1   | phosphatidylinositol-specific phospholipase C, X domain containing 1 | -0.74342 | 0.000701383 | 0.001724197 |
| PLD1     | phospholipase D1, phosphatidylcholine-specific                       | -0.05392 | 0.596328244 | 0.681853386 |
| PLD2     | phospholipase D2                                                     | 0.20105  | 0.064184997 | 0.102023534 |
| PLD3     | phospholipase D family, member 3                                     | -1.59763 | 1.08E-20    | 1.61E-19    |
| PMM1     | phosphomannomutase 1                                                 | -0.53546 | 0.003892455 | 0.008200375 |
| PMM2     | phosphomannomutase 2                                                 | 0.80123  | 6.75E-06    | 2.36E-05    |
| PMVK     | phosphomevalonate kinase                                             | -0.16589 | 0.297471257 | 0.384462216 |
| PNLIP    | pancreatic lipase                                                    | -0.34416 | 2.85E-05    | 8.98E-05    |
| PNLIPRP1 | pancreatic lipase-related protein 1                                  | -0.27213 | 1.42E-09    | 8.58E-09    |
| PNLIPRP2 | pancreatic lipase-related protein 2                                  | -0.15460 | 0.007620894 | 0.015042017 |
| PNMT     | phenylethanolamine N-methyltransferase                               | -0.84047 | 2.50E-13    | 2.21E-12    |
| PNPLA2   | patatin-like phospholipase domain containing 2                       | -0.23451 | 0.012130205 | 0.022982951 |
| PNPLA3   | patatin-like phospholipase domain containing 3                       | -0.37247 | 0.002905584 | 0.006284097 |
| PNPLA4   | patatin-like phospholipase domain containing 4                       | -0.53755 | 0.091265031 | 0.138567444 |
| PNPLA6   | patatin-like phospholipase domain containing 6                       | -0.71810 | 0.000683738 | 1.68E-03    |
| PNPO     | pyridoxamine 5'-phosphate oxidase                                    | 0.51863  | 0.00254084  | 0.005591456 |
| POFUT1   | protein O-fucosyltransferase 1                                       | 0.49794  | 4.20E-08    | 2.06E-07    |
| POFUT2   | protein O-fucosyltransferase 2                                       | -0.00264 | 0.969083418 | 0.978711669 |
| POMGNT1  | protein O-linked mannose beta1,2-N-acetylglucosaminyltransferase     | 0.56056  | 2.73E-05    | 8.63E-05    |
| POMT1    | protein-O-mannosyltransferase 1                                      | -0.14300 | 0.416763398 | 0.507657273 |
| POMT2    | protein-O-mannosyltransferase 2                                      | 0.25380  | 0.008853141 | 0.017306188 |
| PON1     | paraoxonase 1                                                        | -0.19046 | 0.009985962 | 0.019297967 |
| PON2     | paraoxonase 2                                                        | 0.73684  | 0.002128911 | 4.75E-03    |
| PON3     | paraoxonase 3                                                        | -0.10022 | 0.760914979 | 0.820657906 |

|         |                                                              |          |             |             |
|---------|--------------------------------------------------------------|----------|-------------|-------------|
| POR     | P450 (cytochrome) oxidoreductase                             | 0.60430  | 0.000105061 | 3.00E-04    |
| PPA1    | pyrophosphatase (inorganic) 1                                | -1.03747 | 1.03E-08    | 5.48E-08    |
| PPA2    | pyrophosphatase (inorganic) 2                                | 0.15765  | 0.319878625 | 0.409517157 |
| PPAP2A  | phosphatidic acid phosphatase type 2A                        | 0.17711  | 0.469934991 | 0.562317738 |
| PPAP2B  | phosphatidic acid phosphatase type 2B                        | -0.19573 | 0.480676192 | 0.572810492 |
| PPAP2C  | phosphatidic acid phosphatase type 2C                        | -0.17194 | 0.567366423 | 0.655745275 |
| PPAT    | phosphoribosyl pyrophosphate amidotransferase                | 0.54442  | 0.008033166 | 0.015794416 |
| PPCDC   | phosphopantothenoylcysteine decarboxylase                    | 0.77991  | 1.62E-05    | 5.31E-05    |
| PPCS    | phosphopantothenoylcysteine synthetase                       | 0.11863  | 0.521401828 | 0.610956725 |
| PPOX    | protoporphyrinogen oxidase                                   | 0.10654  | 0.515854208 | 0.606805027 |
| PRDX1   | peroxiredoxin 1                                              | 0.30629  | 0.047790341 | 7.90E-02    |
| PRDX2   | peroxiredoxin 2                                              | 0.09192  | 0.367312267 | 0.459253284 |
| PRDX3   | peroxiredoxin 3                                              | 0.00953  | 0.918488287 | 0.943998273 |
| PRDX4   | peroxiredoxin 4                                              | 2.17080  | 1.82E-26    | 4.12E-25    |
| PRDX6   | peroxiredoxin 6                                              | 0.60237  | 4.82E-05    | 1.45E-04    |
| PRG2    | plasticity-related gene 2                                    | 0.01444  | 0.852257049 | 0.894495911 |
| PRODH   | proline dehydrogenase (oxidase) 1                            | -1.23975 | 1.26E-05    | 4.20E-05    |
| PRODH2  | proline dehydrogenase (oxidase) 2                            | -0.25788 | 0.000849628 | 0.002048984 |
| PRPS1   | phosphoribosyl pyrophosphate synthetase 1                    | 0.10655  | 0.524949965 | 0.614406032 |
| PRPS1L1 | phosphoribosyl pyrophosphate synthetase 1-like 1             | 0.09003  | 0.05683486  | 0.091921456 |
| PRPS2   | phosphoribosyl pyrophosphate synthetase 2                    | 0.12807  | 0.627524352 | 0.706790586 |
| PRPSAP1 | Phosphoribosyl pyrophosphate synthetase-associated protein 1 | -0.03844 | 0.759449533 | 0.819947372 |
| PRPSAP2 | phosphoribosyl pyrophosphate synthetase-associated protein 2 | 0.10595  | 0.540631224 | 0.63021977  |
| PSPH    | phosphoserine phosphatase                                    | 1.86375  | 4.18E-08    | 2.06E-07    |
| PTDSS1  | phosphatidylserine synthase 1                                | -0.41215 | 0.000444402 | 0.001142187 |

|         |                                                                                                 |          |             |             |
|---------|-------------------------------------------------------------------------------------------------|----------|-------------|-------------|
| PTDSS2  | phosphatidylserine synthase 2                                                                   | 0.07016  | 0.636809468 | 0.715267209 |
| PTEN    | phosphatase and tensin homolog                                                                  | 0.36901  | 0.031538322 | 0.054290109 |
| PTER    | phosphotriesterase related                                                                      | -0.61616 | 0.041984257 | 0.070598838 |
| PTGDS   | prostaglandin D2 synthase 21kDa (brain)                                                         | -2.94405 | 3.79E-07    | 1.62E-06    |
| PTGES   | prostaglandin E synthase                                                                        | -0.16638 | 0.377416407 | 0.468715672 |
| PTGES2  | prostaglandin E synthase 2                                                                      | -1.01507 | 2.76E-18    | 3.48E-17    |
| PTGES3  | prostaglandin E synthase 3 (cytosolic)                                                          | 0.40299  | 0.000916774 | 2.19E-03    |
| PTGIS   | prostaglandin I2 (prostacyclin) synthase                                                        | -0.06045 | 0.377883721 | 0.469009527 |
| PTGS1   | prostaglandin-endoperoxide synthase 1 (prostaglandin G/H synthase and cyclooxygenase)           | 1.50384  | 8.52E-05    | 0.000245749 |
| PTGS2   | prostaglandin-endoperoxide synthase 2 (prostaglandin G/H synthase and cyclooxygenase)           | -0.05332 | 0.89877567  | 0.93079016  |
| PTS     | 6-pyruvoyltetrahydropterin synthase                                                             | -0.66323 | 0.000576873 | 0.001447241 |
| PYCR1   | pyrroline-5-carboxylate reductase 1                                                             | 0.30980  | 0.051544173 | 0.084022656 |
| PYCR2   | pyrroline-5-carboxylate reductase-like                                                          | 0.07491  | 0.482737998 | 0.574899739 |
| PYGB    | phosphorylase, glycogen; brain                                                                  | -0.18147 | 0.414135313 | 0.505061243 |
| PYGL    | phosphorylase, glycogen; liver (Hers disease, glycogen storage disease type VI)                 | 2.78091  | 2.91E-18    | 3.65E-17    |
| PYGM    | phosphorylase, glycogen; muscle (McArdle syndrome, glycogen storage disease type V)             | -1.55699 | 1.13E-09    | 6.94E-09    |
| PYROXD1 | pyridine nucleotide-disulphide oxidoreductase domain 1                                          | 0.00192  | 0.990606621 | 0.994520128 |
| QDPR    | quinoid dihydropteridine reductase                                                              | -1.41481 | 3.69E-10    | 2.37E-09    |
| QPRT    | quinolinate phosphoribosyltransferase (nicotinate-nucleotide pyrophosphorylase (carboxylating)) | 0.37254  | 0.145750302 | 0.207961774 |
| RBKS    | ribokinase                                                                                      | -0.23523 | 0.200057591 | 0.27259858  |
| RDH11   | retinol dehydrogenase 11 (all-trans/9-cis/11-cis)                                               | 0.05288  | 0.751322529 | 0.812467395 |
| RDH14   | retinol dehydrogenase 14 (all-trans/9-cis/11-cis)                                               | -0.43489 | 0.000207328 | 5.67E-04    |
| RDH16   | retinol dehydrogenase 16 (all-trans)                                                            | -0.13316 | 0.161238105 | 0.225911142 |
| RDH5    | retinol dehydrogenase 5 (11-cis/9-cis)                                                          | 0.23750  | 0.137959549 | 0.199624031 |
| RDH8    | retinol dehydrogenase 8 (all-trans)                                                             | -0.26406 | 0.00014313  | 0.000401356 |

|        |                                                                                    |          |             |             |
|--------|------------------------------------------------------------------------------------|----------|-------------|-------------|
| RENBP  | renin binding protein                                                              | 0.38424  | 0.032699223 | 0.056004651 |
| RETSAT | retinol saturase (all-trans-retinol 13,14-reductase)                               | 0.63021  | 0.000202055 | 5.54E-04    |
| RFK    | riboflavin kinase                                                                  | -0.52162 | 0.000903323 | 2.16E-03    |
| RHAG   | Rh-associated glycoprotein                                                         | -0.07823 | 0.324534547 | 0.414694365 |
| RHBG   | Rh family, B glycoprotein                                                          | -0.37332 | 0.001452202 | 0.003346932 |
| RHCG   | Rh family, C glycoprotein                                                          | -0.41937 | 0.000351394 | 0.000920598 |
| RPE    | ribulose-5-phosphate-3-epimerase                                                   | 0.41435  | 0.00156063  | 3.57E-03    |
| RPE65  | retinal pigment epithelium-specific protein 65kDa                                  | 1.29532  | 0.001995252 | 4.48E-03    |
| RPIA   | ribose 5-phosphate isomerase A (ribose 5-phosphate epimerase)                      | 0.83417  | 8.43E-09    | 4.52E-08    |
| RRM1   | ribonucleotide reductase M1 polypeptide                                            | 1.45847  | 1.16E-10    | 7.81E-10    |
| RRM2   | ribonucleotide reductase M2 polypeptide                                            | 4.55601  | 1.61E-28    | 3.89E-27    |
| RYR1   | ryanodine receptor 1 (skeletal)                                                    | -0.76188 | 1.06E-08    | 5.61E-08    |
| RYR2   | ryanodine receptor 2 (cardiac)                                                     | -3.74688 | 4.38E-82    | 9.88E-80    |
| RYR3   | ryanodine receptor 3                                                               | -1.11150 | 0.031623783 | 5.43E-02    |
| SARDH  | sarcosine dehydrogenase                                                            | -0.17992 | 0.000140933 | 0.000396288 |
| SAT1   | spermidine/spermine N1-acetyltransferase 1                                         | 1.59802  | 2.70E-16    | 3.01E-15    |
| SC5DL  | sterol-C5-desaturase (ERG3 delta-5-desaturase homolog, <i>S. cerevisiae</i> )-like | -0.66205 | 1.22E-08    | 6.32E-08    |
| SCCPDH | saccharopine dehydrogenase (putative)                                              | -0.13057 | 0.374151014 | 0.466369719 |
| SCD    | stearoyl-CoA desaturase (delta-9-desaturase)                                       | -0.92460 | 9.78E-05    | 2.80E-04    |
| SCD5   | stearoyl-CoA desaturase 5                                                          | 0.32119  | 0.154980508 | 0.218565166 |
| SCLY   | selenocysteine lyase                                                               | 0.04641  | 0.593805196 | 0.680258573 |
| SCN10A | sodium channel, voltage-gated, type X, alpha                                       | -0.56716 | 7.85E-13    | 6.57E-12    |
| SCN11A | sodium channel, voltage-gated, type XI, alpha                                      | 0.11798  | 0.042105848 | 0.070744784 |
| SCN1A  | sodium channel, voltage-gated, type I, alpha                                       | -1.20185 | 0.001924462 | 4.33E-03    |
| SCN1B  | sodium channel, voltage-gated, type I, beta                                        | -1.30614 | 9.31E-10    | 5.77E-09    |



|         |                                                                              |          |             |             |
|---------|------------------------------------------------------------------------------|----------|-------------|-------------|
| SCN2A   | sodium channel, voltage-gated, type II, alpha 1                              | -4.09831 | 3.18E-41    | 1.80E-39    |
| SCN2B   | sodium channel, voltage-gated, type II, beta                                 | -0.91010 | 3.67E-50    | 2.87E-48    |
| SCN3A   | sodium channel, voltage-gated, type III, alpha                               | -0.86383 | 0.12194247  | 1.79E-01    |
| SCN3B   | sodium channel, voltage-gated, type III, beta                                | -5.31927 | 5.60E-32    | 1.70E-30    |
| SCN4A   | sodium channel, voltage-gated, type IV, alpha                                | -0.29353 | 4.15E-05    | 0.000126305 |
| SCN5A   | sodium channel, voltage-gated, type V, alpha                                 | -0.41145 | 5.25E-06    | 1.87E-05    |
| SCN7A   | sodium channel, voltage-gated, type VII, alpha                               | -0.07930 | 0.46528186  | 0.557406024 |
| SCN8A   | sodium channel, voltage-gated, type VIII, alpha                              | -1.85169 | 1.95E-79    | 3.96E-77    |
| SCN9A   | sodium channel, voltage-gated, type IX, alpha                                | 0.16170  | 0.390000431 | 0.481110968 |
| SCNN1A  | sodium channel, nonvoltage-gated, type I, alpha                              | -0.49286 | 5.74E-09    | 3.23E-08    |
| SCNN1B  | sodium channel, nonvoltage-gated 1 beta                                      | 0.21336  | 0.109455932 | 0.161835571 |
| SCNN1D  | sodium channel, nonvoltage-gated 1, delta                                    | -0.09498 | 0.091355359 | 0.138601078 |
| SCNN1G  | sodium channel, nonvoltage-gated 1 gamma                                     | 0.02648  | 0.681284709 | 0.753974858 |
| SCP2    | sterol carrier protein 2                                                     | 1.35987  | 2.16E-31    | 6.36E-30    |
| SDHA    | succinate dehydrogenase complex, subunit A, flavoprotein (Fp)                | -0.33946 | 0.007616553 | 0.015042017 |
| SDHB    | succinate dehydrogenase complex, subunit B, iron sulfur (Ip)                 | -0.00473 | 0.960463794 | 0.972421759 |
| SDHC    | succinate dehydrogenase complex, subunit C, integral membrane protein, 15kDa | 0.58854  | 6.02E-05    | 1.78E-04    |
| SDHD    | succinate dehydrogenase complex, subunit D, integral membrane protein        | 0.53946  | 5.58E-09    | 3.15E-08    |
| SDR39U1 | short chain dehydrogenase/reductase family 39U, member 1                     | -0.03606 | 0.836792821 | 0.884659285 |
| SDS     | serine dehydratase                                                           | -0.47545 | 0.060684471 | 0.096990014 |
| SEPHS1  | selenophosphate synthetase 1                                                 | 0.45268  | 0.017428006 | 0.031948724 |
| SEPHS2  | selenophosphate synthetase 2                                                 | -0.08709 | 0.517387425 | 0.607406979 |
| SFXN1   | Sideroflexin 1                                                               | 0.62263  | 0.000164398 | 0.000455964 |
| SFXN3   | Sideroflexin 3                                                               | -0.98517 | 4.40E-09    | 2.50E-08    |
| SGMS1   | sphingomyelin synthase 1                                                     | 0.16541  | 0.484556922 | 0.57596262  |

|         |                                                                                     |          |             |             |
|---------|-------------------------------------------------------------------------------------|----------|-------------|-------------|
| SGPL1   | sphingosine-1-phosphate lyase 1                                                     | 1.08001  | 4.34E-09    | 2.48E-08    |
| SGPP1   | sphingosine-1-phosphate phosphatase 1                                               | 0.10311  | 0.690232874 | 0.760978    |
| SGSH    | N-sulfoglucosamine sulfohydrolase (sulfamidase)                                     | 0.63859  | 2.51E-06    | 9.55E-06    |
| SHMT1   | serine hydroxymethyltransferase 1 (soluble)                                         | 0.23939  | 0.000696278 | 0.001713721 |
| SHMT2   | serine hydroxymethyltransferase 2 (mitochondrial)                                   | 1.24612  | 3.22E-07    | 1.39E-06    |
| SI      | sucrase-isomaltase (alpha-glucosidase)                                              | -0.08959 | 0.076377262 | 0.119167286 |
| SLC10A1 | solute carrier family 10 (sodium/bile acid cotransporter family), member 1          | -0.26795 | 3.52E-05    | 0.000108141 |
| SLC10A2 | solute carrier family 10, member 2                                                  | -0.12359 | 0.086091524 | 0.13194741  |
| SLC10A3 | solute carrier family 10 (sodium/bile acid cotransporter family), member 3          | 0.63605  | 0.000373095 | 0.000972439 |
| SLC11A1 | solute carrier family 11 (proton-coupled divalent metal ion transporters), member 1 | 0.69374  | 4.00E-05    | 1.22E-04    |
| SLC11A2 | solute carrier family 11 (proton-coupled divalent metal ion transporters), member 2 | -0.03854 | 0.796934266 | 0.848652539 |
| SLC12A1 | solute carrier family 12 (sodium/potassium/chloride transporters), member 1         | -0.05630 | 0.267037772 | 0.351839139 |
| SLC12A2 | solute carrier family 12, member 2                                                  | 0.12214  | 0.47213973  | 0.564623572 |
| SLC12A3 | solute carrier family 12, member 3                                                  | -0.05099 | 0.392671369 | 0.483232986 |
| SLC12A4 | solute carrier family 12, member 4                                                  | 0.02435  | 0.619272989 | 0.699640882 |
| SLC12A5 | solute carrier family 12, member 5                                                  | -5.44219 | 3.26E-38    | 1.44E-36    |
| SLC12A6 | solute carrier family 12, member 6                                                  | -0.46863 | 1.25E-07    | 5.73E-07    |
| SLC12A7 | solute carrier family 12, member 7                                                  | 0.19961  | 0.359177441 | 0.45113457  |
| SLC12A8 | solute carrier family 12 (potassium/chloride transporters), member 8                | -0.66683 | 0.004664512 | 0.009676482 |
| SLC12A9 | solute carrier family 12 (potassium/chloride transporters), member 9                | 0.69030  | 1.93E-09    | 1.15E-08    |
| SLC13A1 | solute carrier family 13 (sodium/sulphate symporters), member 1                     | -0.06583 | 0.168229424 | 0.233933255 |
| SLC13A2 | solute carrier family 13 (sodium-dependent dicarboxylate transporter), member 2     | -0.00798 | 0.918896831 | 0.943998273 |
| SLC13A3 | solute carrier family 13 (sodium-dependent dicarboxylate transporter), member 3     | -0.92653 | 2.66E-09    | 1.56E-08    |
| SLC13A4 | solute carrier family 13 (sodium/sulfate symporters), member 4                      | -1.30497 | 1.03E-15    | 1.09E-14    |
| SLC14A1 | solute carrier family 14 (urea transporter), member 1                               | 0.50075  | 0.262723055 | 0.347505511 |

|          |                                                                                         |          |             |             |
|----------|-----------------------------------------------------------------------------------------|----------|-------------|-------------|
| SLC14A2  | solute carrier family 14 (urea transporter), member 2                                   | -0.19213 | 0.029142458 | 0.050853894 |
| SLC15A1  | solute carrier family 15 (oligopeptide transporter), member 1                           | -0.11311 | 0.057299257 | 0.092389675 |
| SLC15A2  | solute carrier family 15 (H <sup>+</sup> /peptide transporter), member 2                | -0.16394 | 0.585659831 | 0.673442554 |
| SLC15A3  | solute carrier family 15, member 3                                                      | 0.89216  | 5.74E-05    | 1.71E-04    |
| SLC16A1  | solute carrier family 16 (monocarboxylic acid transporters), member 1                   | 2.15998  | 2.95E-20    | 4.26E-19    |
| SLC16A10 | solute carrier family 16 (monocarboxylic acid transporters), member 10                  | 0.56275  | 0.074185776 | 0.116104452 |
| SLC16A2  | solute carrier family 16 (monocarboxylic acid transporters), member 2                   | 0.03501  | 0.863238085 | 0.902294615 |
| SLC16A3  | solute carrier family 16 (monocarboxylic acid transporters), member 3                   | 0.60590  | 0.000471826 | 1.21E-03    |
| SLC16A4  | solute carrier family 16 (monocarboxylic acid transporters), member 4                   | 2.26014  | 2.69E-11    | 1.95E-10    |
| SLC16A5  | solute carrier family 16 (monocarboxylic acid transporters), member 5                   | -0.01185 | 0.929665821 | 0.950709564 |
| SLC16A6  | solute carrier family 16 (monocarboxylic acid transporters), member 6                   | -0.10203 | 0.632291231 | 0.711274337 |
| SLC16A7  | solute carrier family 16 (monocarboxylic acid transporters), member 7                   | -0.54076 | 0.017403289 | 3.19E-02    |
| SLC16A8  | solute carrier family 16 (monocarboxylic acid transporters), member 8                   | -0.39664 | 1.55E-06    | 6.07E-06    |
| SLC17A1  | solute carrier family 17 (sodium phosphate), member 1                                   | 0.01044  | 0.851158727 | 0.893804593 |
| SLC17A2  | solute carrier family 17 (sodium phosphate), member 2                                   | -0.36562 | 7.75E-07    | 3.20E-06    |
| SLC17A3  | solute carrier family 17 (sodium phosphate), member 3                                   | -0.02163 | 0.750555502 | 0.812467395 |
| SLC17A4  | solute carrier family 17 (sodium phosphate), member 4                                   | -0.42716 | 2.83E-08    | 1.43E-07    |
| SLC17A5  | solute carrier family 17 (anion/sugar transporter), member 5                            | 0.56513  | 0.002421315 | 0.005346268 |
| SLC17A6  | solute carrier family 17 (sodium-dependent inorganic phosphate cotransporter), member 6 | -3.44652 | 9.94E-23    | 1.74E-21    |
| SLC17A7  | solute carrier family 17 (sodium-dependent inorganic phosphate cotransporter), member 7 | -6.00159 | 9.65E-36    | 3.63E-34    |
| SLC18A1  | solute carrier family 18 (vesicular monoamine), member 1                                | -0.00146 | 0.991829788 | 0.995256643 |
| SLC18A2  | solute carrier family 18 (vesicular monoamine), member 2                                | -0.04866 | 0.51319734  | 0.605179926 |
| SLC18A3  | solute carrier family 18 (vesicular monoamine), member 3                                | -0.29929 | 0.003939704 | 0.008282749 |
| SLC19A1  | solute carrier family 19 (folate transporter), member 1                                 | 0.17490  | 0.006489593 | 0.013074754 |
| SLC19A2  | solute carrier family 19 (thiamine transporter), member 2                               | 1.06358  | 2.34E-07    | 1.04E-06    |

|            |                                                                                                         |          |             |             |
|------------|---------------------------------------------------------------------------------------------------------|----------|-------------|-------------|
| SLC19A3    | solute carrier family 19 (sodium/hydrogen exchanger), member 3                                          | -0.20798 | 0.043562609 | 0.072831236 |
| SLC1A1     | solute carrier family 1 (neuronal/epithelial high affinity glutamate transporter, system Xag), member 1 | -1.43575 | 1.37E-06    | 5.42E-06    |
| SLC1A2     | solute carrier family 1 (glial high affinity glutamate transporter), member 2                           | -3.27877 | 8.66E-14    | 7.83E-13    |
| SLC1A3     | solute carrier family 1 (glial high affinity glutamate transporter), member 3                           | -0.41811 | 0.379290792 | 0.469895296 |
| SLC1A4     | solute carrier family 1 (glutamate/neutral amino acid transporter), member 4                            | -1.20487 | 5.12E-06    | 1.84E-05    |
| SLC1A5     | solute carrier family 1 (neutral amino acid transporter), member 5                                      | 0.52089  | 0.007584547 | 0.015014005 |
| SLC1A6     | solute carrier family 1 (high affinity aspartate/glutamate transporter), member 6                       | -1.44248 | 5.13E-34    | 1.74E-32    |
| SLC1A7     | solute carrier family 1 (glutamate transporter), member 7                                               | -0.28310 | 1.18E-05    | 3.94E-05    |
| SLC20A1    | solute carrier family 20, member 1                                                                      | -0.24939 | 0.305382492 | 0.393685863 |
| SLC20A2    | solute carrier family 20, member 2                                                                      | 0.34054  | 0.14217726  | 2.04E-01    |
| SLC22A1    | solute carrier family 22 (organic cation transporter), member 1                                         | -0.30373 | 2.73E-09    | 1.60E-08    |
| SLC22A11   | solute carrier family 22 (organic anion/cation transporter), member 11                                  | -0.10346 | 0.051203252 | 0.083611415 |
| SLC22A13   | solute carrier family 22 (organic cation transporter), member 13                                        | -0.15780 | 0.013167507 | 0.024719081 |
| SLC22A14   | solute carrier family 22 (organic cation transporter), member 14                                        | -0.09806 | 0.201799143 | 0.274787447 |
| SLC22A17   | solute carrier family 22 (organic cation transporter), member 17                                        | -0.89495 | 5.93E-09    | 3.32E-08    |
| SLC22A18   | solute carrier family 22 (organic cation transporter), member 18                                        | 0.57677  | 0.048762559 | 0.080205731 |
| SLC22A18AS | solute carrier family 22 (organic cation transporter), member 18 antisense                              | 0.08519  | 0.472675743 | 0.564932266 |
| SLC22A2    | solute carrier family 22 (organic cation transporter), member 2                                         | -0.31787 | 4.27E-06    | 1.55E-05    |
| SLC22A3    | solute carrier family 22 (organic cation transporter), member 3                                         | -0.03823 | 0.751095681 | 0.812467395 |
| SLC22A4    | solute carrier family 22 (organic cation transporter), member 4                                         | 0.50788  | 0.060047184 | 0.096048622 |
| SLC22A5    | solute carrier family 22 (organic cation transporter), member 5                                         | 0.42247  | 0.028757802 | 0.050357116 |
| SLC22A6    | solute carrier family 22 (organic anion transporter), member 6                                          | -0.25165 | 1.07E-05    | 3.60E-05    |
| SLC22A7    | solute carrier family 22 (organic anion transporter), member 7                                          | -0.27998 | 2.71E-08    | 1.37E-07    |
| SLC22A8    | solute carrier family 22 (organic anion transporter), member 8                                          | -0.49874 | 6.66E-09    | 3.69E-08    |
| SLC23A2    | solute carrier family 23 (nucleobase transporters), member 2                                            | -1.07456 | 9.05E-07    | 3.68E-06    |

|          |                                                                                              |          |             |             |
|----------|----------------------------------------------------------------------------------------------|----------|-------------|-------------|
| SLC24A1  | solute carrier family 24 (sodium/potassium/calcium exchanger), member 1                      | 0.00825  | 0.869948234 | 0.907442155 |
| SLC24A2  | solute carrier family 24 (sodium/potassium/calcium exchanger), member 2                      | -1.46380 | 9.84E-37    | 4.17E-35    |
| SLC24A3  | solute carrier family 24 (sodium/potassium/calcium exchanger), member 3                      | -0.98318 | 0.012546154 | 2.37E-02    |
| SLC24A6  | solute carrier family 24 (sodium/potassium/calcium exchanger), member 6                      | 0.28795  | 0.023425601 | 0.04195969  |
| SLC25A1  | solute carrier family 25 (mitochondrial carrier, citrate transporter), member 1              | 0.79955  | 3.92E-05    | 1.20E-04    |
| SLC25A10 | solute carrier family 25 (mitochondrial carrier, dicarboxylate transporter), member 10       | -0.20032 | 0.054778671 | 0.08894971  |
| SLC25A11 | solute carrier family 25 (mitochondrial carrier oxoglutarate carrier), member 11             | -0.51050 | 0.000731661 | 0.00179213  |
| SLC25A12 | solute carrier family 25 (mitochondrial carrier, Aralar), member 12                          | -1.62876 | 2.80E-22    | 4.74E-21    |
| SLC25A13 | solute carrier family 25 (mitochondrial carrier, adenine nucleotide translocator), member 13 | 1.94952  | 3.48E-24    | 6.74E-23    |
| SLC25A14 | solute carrier family 25 (mitochondrial carrier, brain), member 14                           | -1.40812 | 2.22E-20    | 3.28E-19    |
| SLC25A15 | solute carrier family 25 (mitochondrial carrier ornithine transporter), member 15            | 1.06111  | 4.44E-06    | 1.61E-05    |
| SLC25A16 | solute carrier family 25 (mitochondrial carrier, Graves disease autoantigen), member 16      | -0.14013 | 0.233404462 | 0.313002158 |
| SLC25A17 | solute carrier family 25 (mitochondrial carrier, peroxisomal membrane protein), member 17    | 0.49827  | 0.000179646 | 0.000494879 |
| SLC25A20 | solute carrier family 25 (mitochondrial carnitine/acylcarnitine translocase), member 20      | 1.07616  | 7.46E-06    | 2.59E-05    |
| SLC25A21 | solute carrier family 25 (mitochondrial oxodicarboxylate carrier), member 21                 | -0.03916 | 0.667444491 | 0.74179308  |
| SLC25A22 | solute carrier family 25 (mitochondrial carrier, glutamate), member 22                       | -2.58043 | 3.88E-56    | 3.43E-54    |
| SLC25A23 | solute carrier family 25 (mitochondrial carrier; phosphate carrier), member 23               | -0.98796 | 1.35E-06    | 5.36E-06    |
| SLC25A24 | solute carrier family 25 (mitochondrial carrier, phosphate carrier), member 24               | 1.30085  | 2.84E-06    | 1.07E-05    |
| SLC25A28 | solute carrier family 25, member 28                                                          | -1.05173 | 7.09E-13    | 6.03E-12    |
| SLC25A3  | solute carrier family 25 (mitochondrial carrier, phosphate carrier), member 3                | -0.33847 | 0.000414056 | 1.07E-03    |
| SLC25A31 | solute carrier family 25 (mitochondrial carrier; adenine nucleotide translocator), member 31 | 0.08441  | 0.023876404 | 0.042579587 |
| SLC25A32 | solute carrier family 25, member 32                                                          | 0.11465  | 0.489679975 | 0.580816446 |
| SLC25A36 | solute carrier family 25, member 36                                                          | -0.39411 | 0.00686936  | 1.38E-02    |
| SLC25A37 | solute carrier family 25, member 37                                                          | 0.06168  | 0.75732279  | 0.818085671 |
| SLC25A38 | solute carrier family 25, member 38                                                          | 0.02867  | 0.842891424 | 0.888335026 |

|          |                                                                                             |          |             |             |
|----------|---------------------------------------------------------------------------------------------|----------|-------------|-------------|
| SLC25A4  | solute carrier family 25 (mitochondrial carrier, adenine nucleotide translocator), member 4 | -2.14164 | 1.21E-31    | 3.62E-30    |
| SLC25A40 | solute carrier family 25, member 40                                                         | -0.05317 | 0.667466579 | 0.74179308  |
| SLC25A42 | solute carrier family 25, member 42                                                         | -0.05463 | 0.271741963 | 0.356190464 |
| SLC25A44 | solute carrier family 25, member 44                                                         | -0.87978 | 8.90E-15    | 8.75E-14    |
| SLC25A46 | solute carrier family 25, member 46                                                         | -0.08932 | 0.590088591 | 0.67709077  |
| SLC25A5  | solute carrier family 25 (mitochondrial carrier, adenine nucleotide translocator), member 5 | 0.32648  | 0.040269026 | 0.067995788 |
| SLC25A6  | solute carrier family 25 (mitochondrial carrier; adenine nucleotide translocator), member 6 | -0.06085 | 0.707794898 | 0.776131083 |
| SLC26A1  | solute carrier family 26 (sulfate transporter), member 1                                    | -0.15216 | 0.007827643 | 0.015405225 |
| SLC26A10 | solute carrier family 26, member 10                                                         | 0.17345  | 0.476989828 | 0.569084695 |
| SLC26A2  | solute carrier family 26 (sulfate transporter), member 2                                    | 1.55134  | 8.88E-08    | 4.16E-07    |
| SLC26A3  | solute carrier family 26, member 3                                                          | -0.03860 | 0.456446037 | 0.54843664  |
| SLC26A4  | solute carrier family 26, member 4                                                          | -0.12226 | 0.284911381 | 0.370585309 |
| SLC26A6  | solute carrier family 26, member 6                                                          | 0.17783  | 0.068849929 | 0.10867384  |
| SLC27A2  | solute carrier family 27 (fatty acid transporter), member 2                                 | -1.16380 | 1.60E-10    | 1.06E-09    |
| SLC27A3  | solute carrier family 27 (fatty acid transporter), member 3                                 | 1.38229  | 4.24E-06    | 1.54E-05    |
| SLC27A5  | solute carrier family 27 (fatty acid transporter), member 5                                 | -0.43920 | 0.045759768 | 0.076066729 |
| SLC27A6  | solute carrier family 27 (fatty acid transporter), member 6                                 | -0.08018 | 0.653106546 | 0.730746069 |
| SLC28A1  | solute carrier family 28 (sodium-coupled nucleoside transporter), member 1                  | -0.09975 | 0.141709401 | 0.203600856 |
| SLC28A2  | solute carrier family 28 (sodium-coupled nucleoside transporter), member 2                  | -0.05215 | 0.277735476 | 0.363110111 |
| SLC28A3  | solute carrier family 28 (sodium-coupled nucleoside transporter), member 3                  | -0.10106 | 0.102893106 | 0.153134469 |
| SLC29A1  | solute carrier family 29 (nucleoside transporters), member 1                                | 0.36049  | 0.033211507 | 5.68E-02    |
| SLC29A2  | solute carrier family 29 (nucleoside transporters), member 2                                | 0.12502  | 0.417927272 | 0.508410905 |
| SLC29A3  | solute carrier family 29 (nucleoside transporters), member 3                                | -0.48709 | 0.007382633 | 0.014642821 |
| SLC2A1   | solute carrier family 2 (facilitated glucose transporter), member 1                         | 0.12686  | 0.513117895 | 0.605179926 |
| SLC2A10  | solute carrier family 2 (facilitated glucose transporter), member 10                        | 2.33986  | 3.64E-10    | 2.34E-09    |

|          |                                                                                       |          |             |             |
|----------|---------------------------------------------------------------------------------------|----------|-------------|-------------|
| SLC2A11  | solute carrier family 2 (facilitated glucose transporter), member 11                  | -0.17687 | 0.003072484 | 0.006595946 |
| SLC2A2   | solute carrier family 2 (facilitated glucose transporter), member 2                   | -0.04984 | 0.606055827 | 0.689100389 |
| SLC2A3   | solute carrier family 2 (facilitated glucose transporter), member 3                   | -0.32593 | 0.355801659 | 0.4478915   |
| SLC2A4   | solute carrier family 2 (facilitated glucose transporter), member 4                   | 0.03497  | 0.61111929  | 0.693593849 |
| SLC2A5   | solute carrier family 2 (facilitated glucose transporter), member 5                   | 1.01315  | 0.005650667 | 1.15E-02    |
| SLC2A6   | solute carrier family 2 (facilitated glucose transporter), member 6                   | -1.59946 | 5.45E-18    | 6.68E-17    |
| SLC2A8   | solute carrier family 2, (facilitated glucose transporter), member 8                  | -0.44748 | 0.000344022 | 0.000907131 |
| SLC2A9   | solute carrier family 2 (facilitated glucose transporter), member 9                   | 0.17845  | 0.110913472 | 0.163871431 |
| SLC30A1  | solute carrier family 30 (zinc transporter), member 1                                 | 0.06282  | 0.696808373 | 0.766564623 |
| SLC30A10 | solute carrier family 30, member 10                                                   | -0.67078 | 5.63E-05    | 0.000168255 |
| SLC30A3  | solute carrier family 30 (zinc transporter), member 3                                 | -3.81993 | 9.53E-96    | 1.94E-92    |
| SLC30A4  | solute carrier family 30 (zinc transporter), member 4                                 | 0.12695  | 0.010016347 | 0.019319956 |
| SLC30A5  | solute carrier family 30 (zinc transporter), member 5                                 | 0.87253  | 6.90E-16    | 7.42E-15    |
| SLC30A6  | solute carrier family 30 (zinc transporter), member 6                                 | -0.04953 | 0.319486914 | 0.409282584 |
| SLC30A9  | solute carrier family 30 (zinc transporter), member 9                                 | -0.49447 | 5.93E-06    | 2.10E-05    |
| SLC31A1  | solute carrier family 31, member 1                                                    | 0.80656  | 7.08E-07    | 2.94E-06    |
| SLC31A2  | solute carrier family 31, member 2                                                    | -0.39136 | 0.235717233 | 0.315895277 |
| SLC33A1  | solute carrier family 33 (acetyl-CoA transporter), member 1                           | 1.20952  | 2.32E-14    | 2.22E-13    |
| SLC34A1  | solute carrier family 34 (sodium phosphate), member 1                                 | -0.23843 | 8.30E-07    | 3.39E-06    |
| SLC34A2  | solute carrier family 34 (sodium phosphate), member 2                                 | -0.05059 | 0.867665193 | 0.905990415 |
| SLC35A1  | solute carrier family 35 (CMP-sialic acid transporter), member 1                      | 0.78751  | 8.08E-07    | 3.32E-06    |
| SLC35A2  | solute carrier family 35 (UDP-galactose transporter), member 2                        | 0.47502  | 0.000600132 | 0.0015007   |
| SLC35A3  | solute carrier family 35 (UDP-N-acetylglucosamine (UDP-GlcNAc) transporter), member 3 | 0.86500  | 3.41E-07    | 1.46E-06    |
| SLC35A5  | solute carrier family 35, member A5                                                   | 0.47541  | 0.004103222 | 8.61E-03    |
| SLC35B1  | solute carrier family 35, member B1                                                   | 0.21594  | 0.062676017 | 0.099859203 |

|          |                                                                                                      |          |             |             |
|----------|------------------------------------------------------------------------------------------------------|----------|-------------|-------------|
| SLC35C1  | solute carrier family 35, member C1                                                                  | -0.14962 | 0.174923049 | 0.242082068 |
| SLC35C2  | solute carrier family 35, member C2                                                                  | 0.45069  | 0.000502539 | 0.001278675 |
| SLC35D1  | solute carrier family 35 (UDP-glucuronic acid/UDP-N-acetylgalactosamine dual transporter), member D1 | 1.25450  | 1.31E-09    | 7.97E-09    |
| SLC35D2  | solute carrier family 35 (UDP-glucuronic acid/UDP-N-acetylgalactosamine dual transporter), member D2 | 1.30926  | 1.54E-15    | 1.58E-14    |
| SLC35E1  | solute carrier family 35, member E1                                                                  | 0.33086  | 0.010254328 | 0.019722846 |
| SLC35E3  | solute carrier family 35, member E3                                                                  | 0.29849  | 0.329500285 | 0.420247227 |
| SLC35F2  | solute carrier family 35, member F2                                                                  | 1.33235  | 1.61E-06    | 6.30E-06    |
| SLC35F5  | solute carrier family 35, member F5                                                                  | 0.25180  | 0.04492173  | 0.074857276 |
| SLC36A1  | solute carrier family 36 (proton/amino acid symporter), member 1                                     | 0.07702  | 0.695625775 | 0.765677965 |
| SLC37A1  | solute carrier family 37 (glycerol-3-phosphate transporter), member 1                                | -0.29300 | 0.039182691 | 0.066216467 |
| SLC37A4  | solute carrier family 37 (glycerol-6-phosphate transporter), member 4                                | 0.45459  | 0.000133974 | 3.78E-04    |
| SLC38A1  | solute carrier family 38, member 1                                                                   | -1.27365 | 0.001984178 | 4.46E-03    |
| SLC38A2  | solute carrier family 38, member 2                                                                   | 0.30696  | 0.044770277 | 0.074666098 |
| SLC38A3  | solute carrier family 38, member 3                                                                   | 0.05046  | 0.776001048 | 0.833485446 |
| SLC38A4  | solute carrier family 38, member 4                                                                   | 0.04310  | 0.748808604 | 0.811043096 |
| SLC38A6  | solute carrier family 38, member 6                                                                   | 1.87298  | 5.54E-14    | 5.12E-13    |
| SLC38A7  | solute carrier family 38, member 7                                                                   | -0.01225 | 0.936237021 | 0.956467269 |
| SLC39A1  | solute carrier family 39 (zinc transporter), member 1                                                | 1.28255  | 3.69E-16    | 4.03E-15    |
| SLC39A14 | solute carrier family 39 (zinc transporter), member 14                                               | 1.40960  | 1.30E-06    | 5.17E-06    |
| SLC39A2  | solute carrier family 39 (zinc transporter), member 2                                                | -0.00439 | 0.957366639 | 0.971303447 |
| SLC39A4  | solute carrier family 39 (zinc transporter), member 4                                                | -0.29799 | 0.381589168 | 0.472167241 |
| SLC39A6  | solute carrier family 39 (metal ion transporter), member 6                                           | 0.81879  | 8.75E-06    | 2.98E-05    |
| SLC39A8  | solute carrier family 39 (metal ion transporter), member 8                                           | 0.68584  | 0.004229798 | 8.84E-03    |
| SLC39A9  | solute carrier family 39 (zinc transporter), member 9                                                | -0.08921 | 0.280323493 | 0.365787973 |
| SLC3A1   | solute carrier family 3, member 1                                                                    | -0.89328 | 1.51E-18    | 1.96E-17    |



|          |                                                                                            |          |             |             |
|----------|--------------------------------------------------------------------------------------------|----------|-------------|-------------|
| SLC3A2   | solute carrier family 3 (activators of dibasic and neutral amino acid transport), member 2 | 1.11105  | 3.69E-09    | 2.13E-08    |
| SLC41A3  | solute carrier family 41, member 3                                                         | -1.13707 | 1.07E-15    | 1.12E-14    |
| SLC43A1  | solute carrier family 43, member 1                                                         | 0.15600  | 0.167186305 | 0.233052468 |
| SLC43A3  | solute carrier family 43, member 3                                                         | 1.55773  | 1.96E-11    | 1.44E-10    |
| SLC44A1  | solute carrier family 44, member 1                                                         | 0.35453  | 0.239479393 | 0.320303688 |
| SLC44A4  | solute carrier family 44, member 4                                                         | 0.00337  | 0.984288055 | 0.990132417 |
| SLC45A2  | solute carrier family 45, member 2                                                         | -0.12568 | 0.016359286 | 0.030180062 |
| SLC46A3  | solute carrier family 46, member 3                                                         | -0.08190 | 0.672232199 | 0.745173425 |
| SLC47A1  | solute carrier family 47, member 1                                                         | -0.21941 | 0.508024187 | 0.600472775 |
| SLC4A1   | solute carrier family 4 (anion exchanger), member 1                                        | -0.38524 | 1.02E-05    | 3.44E-05    |
| SLC4A10  | solute carrier family 4, sodium bicarbonate cotransporter-like, member 10                  | -0.15037 | 7.05E-05    | 0.000206894 |
| SLC4A1AP | solute carrier family 4 (anion exchanger), member 1, adaptor protein                       | -0.75576 | 6.99E-11    | 4.88E-10    |
| SLC4A2   | solute carrier family 4 (anion exchanger), member 2                                        | 1.50065  | 3.41E-12    | 2.70E-11    |
| SLC4A3   | solute carrier family 4 (anion exchanger), member 3                                        | -1.67302 | 5.20E-09    | 2.94E-08    |
| SLC4A4   | solute carrier family 4 (anion exchanger), member 4                                        | -0.40942 | 0.323396109 | 0.413499553 |
| SLC4A5   | solute carrier family 4 (anion exchanger), member 5                                        | -0.06674 | 0.272865374 | 0.357432543 |
| SLC4A7   | solute carrier family 4 (anion exchanger), member 7                                        | 1.04663  | 2.40E-14    | 2.27E-13    |
| SLC4A8   | solute carrier family 4 (anion exchanger), member 8                                        | -0.58479 | 0.001074877 | 2.54E-03    |
| SLC5A1   | solute carrier family 5 (sodium/glucose cotransporter), member 1                           | -0.20261 | 0.099696858 | 0.149310973 |
| SLC5A12  | solute carrier family 5 (sodium/glucose cotransporter), member 12                          | 0.01471  | 0.841131179 | 0.886939671 |
| SLC5A2   | solute carrier family 5 (sodium/glucose cotransporter), member 2                           | -0.28862 | 4.80E-06    | 1.73E-05    |
| SLC5A3   | solute carrier family 5 (inositol transporters), member 3                                  | 0.31537  | 0.232533676 | 0.31204024  |
| SLC5A4   | solute carrier family 5, member 4a                                                         | 0.00677  | 0.903867419 | 0.934195457 |
| SLC5A5   | solute carrier family 5 (sodium iodide symporter), member 5                                | -0.23404 | 0.003689705 | 0.007797474 |
| SLC5A6   | solute carrier family 5 (sodium-dependent vitamin transporter), member 6                   | 0.18928  | 0.227019019 | 0.306102055 |

|         |                                                                                 |          |             |             |
|---------|---------------------------------------------------------------------------------|----------|-------------|-------------|
| SLC5A7  | solute carrier family 5 (choline transporter), member 7                         | -0.31689 | 7.34E-05    | 0.000215023 |
| SLC6A1  | solute carrier family 6 (neurotransmitter transporter, GABA), member 1          | -2.01527 | 1.48E-05    | 4.88E-05    |
| SLC6A11 | solute carrier family 6 (neurotransmitter transporter, GABA), member 11         | -0.10302 | 0.375642511 | 0.467706404 |
| SLC6A12 | solute carrier family 6 (neurotransmitter transporter, betaine/GABA), member 12 | -0.58311 | 4.44E-07    | 1.87E-06    |
| SLC6A13 | solute carrier family 6 (neurotransmitter transporter, GABA), member 13         | -0.85811 | 1.83E-16    | 2.06E-15    |
| SLC6A14 | solute carrier family 6 (neurotransmitter transporter), member 14               | -0.01919 | 0.926184754 | 0.948100574 |
| SLC6A15 | solute carrier family 6 (neurotransmitter transporter), member 15               | -3.48869 | 1.39E-38    | 6.43E-37    |
| SLC6A16 | solute carrier family 6 (neurotransmitter transporter), member 16               | -0.23170 | 0.045688179 | 0.076009876 |
| SLC6A2  | solute carrier family 6 (neurotransmitter transporter, noradrenalin), member 2  | -0.06887 | 0.186280424 | 0.255883852 |
| SLC6A20 | solute carrier family 6 (neurotransmitter transporter), member 20               | -0.47205 | 1.15E-05    | 3.87E-05    |
| SLC6A3  | solute carrier family 6 (neurotransmitter transporter, dopamine), member 3      | -0.01480 | 0.873238818 | 0.910407445 |
| SLC6A4  | solute carrier family 6 (neurotransmitter transporter, serotonin), member 4     | -0.27976 | 0.032028901 | 0.054949161 |
| SLC6A5  | solute carrier family 6 (neurotransmitter transporter, glycine), member 5       | -0.12663 | 0.029625097 | 0.051520807 |
| SLC6A6  | solute carrier family 6 (neurotransmitter transporter, taurine), member 6       | -0.01562 | 0.7973076   | 0.848652539 |
| SLC6A7  | solute carrier family 6 (neurotransmitter transporter, L-proline), member 7     | 0.02816  | 0.686047705 | 0.757596407 |
| SLC6A8  | solute carrier family 6 (neurotransmitter transporter, creatine), member 8      | 0.37205  | 0.079663793 | 0.123914684 |
| SLC6A9  | solute carrier family 6 (neurotransmitter transporter, glycine), member 9       | 0.27292  | 0.116484322 | 1.71E-01    |
| SLC7A1  | solute carrier family 7 (cationic amino acid transporter, y+ system), member 1  | 0.06715  | 0.443955223 | 0.53532679  |
| SLC7A10 | solute carrier family 7 (cationic amino acid transporter, y+ system), member 10 | -0.90245 | 1.87E-11    | 1.39E-10    |
| SLC7A11 | solute carrier family 7 (cationic amino acid transporter, y+ system), member 11 | -0.41656 | 0.229658751 | 0.308554778 |
| SLC7A2  | solute carrier family 7 (cationic amino acid transporter, y+ system), member 2  | -0.06652 | 0.476926328 | 0.569084695 |
| SLC7A4  | solute carrier family 7 (cationic amino acid transporter, y+ system), member 4  | -0.52104 | 1.04E-25    | 2.21E-24    |
| SLC7A5  | solute carrier family 7 (cationic amino acid transporter, y+ system), member 5  | -0.33595 | 0.240109602 | 0.320935451 |
| SLC7A6  | solute carrier family 7 (cationic amino acid transporter, y+ system), member 6  | -0.01670 | 0.914200376 | 0.941997042 |
| SLC7A7  | solute carrier family 7 (cationic amino acid transporter, y+ system), member 7  | 2.06926  | 2.60E-13    | 2.29E-12    |

|         |                                                                                |          |             |             |
|---------|--------------------------------------------------------------------------------|----------|-------------|-------------|
| SLC7A8  | solute carrier family 7 (cationic amino acid transporter, y+ system), member 8 | -0.33554 | 0.015024712 | 0.02784434  |
| SLC7A9  | solute carrier family 7 (cationic amino acid transporter, y+ system), member 9 | 0.25748  | 0.004237146 | 0.008844063 |
| SLC8A1  | solute carrier family 8 (sodium/calcium exchanger), member 1                   | 0.03090  | 0.516067827 | 0.606805027 |
| SLC8A2  | solute carrier family 8 (sodium/calcium exchanger), member 2                   | -4.03162 | 9.73E-94    | 6.59E-91    |
| SLC9A1  | solute carrier family 9 (sodium/hydrogen exchanger), member 1                  | -0.74571 | 2.96E-08    | 1.50E-07    |
| SLC9A2  | solute carrier family 9 (sodium/hydrogen exchanger), member 2                  | -0.37014 | 9.63E-11    | 6.59E-10    |
| SLC9A3  | solute carrier family 9 (sodium/hydrogen exchanger), member 3                  | -0.14998 | 0.084608673 | 0.13021153  |
| SLC9A5  | solute carrier family 9 (sodium/hydrogen exchanger), member 5                  | 0.11339  | 0.1549419   | 0.218565166 |
| SLC9A6  | solute carrier family 9 (sodium/hydrogen exchanger), isoform 6                 | -2.15860 | 3.86E-30    | 1.02E-28    |
| SLC9A7  | solute carrier family 9 (sodium/hydrogen exchanger), isoform 7                 | -0.27273 | 0.001305731 | 0.00304421  |
| SLC9A8  | solute carrier family 9 (sodium/hydrogen exchanger), member 8                  | 0.57010  | 6.49E-05    | 1.91E-04    |
| SLCO1A2 | solute carrier organic anion transporter family, member 1a2                    | -0.53131 | 0.000769849 | 0.001875531 |
| SLCO1B1 | solute carrier organic anion transporter family, member 1b1                    | -0.18539 | 0.001865665 | 0.004209652 |
| SLCO1B3 | solute carrier organic anion transporter family, member 1b3                    | -0.01173 | 0.902162457 | 0.932907566 |
| SLCO1C1 | solute carrier organic anion transporter family, member 1c1                    | -1.72654 | 0.00070382  | 1.73E-03    |
| SLCO2A1 | solute carrier organic anion transporter family, member 2a1                    | 0.24493  | 0.370864292 | 0.462840458 |
| SLCO2B1 | solute carrier organic anion transporter family, member 2b1                    | 0.63460  | 0.006495574 | 0.013074754 |
| SLCO3A1 | solute carrier organic anion transporter family, member 3a1                    | -0.82041 | 0.002997003 | 6.45E-03    |
| SLCO4A1 | solute carrier organic anion transporter family, member 4a1                    | 0.08886  | 0.713844081 | 0.78149974  |
| SLCO4C1 | solute carrier organic anion transporter family, member 4C1                    | -0.28400 | 0.019588716 | 0.035557018 |
| SLCO5A1 | solute carrier organic anion transporter family, member 5A1                    | -0.13842 | 0.160988503 | 0.225872758 |
| SLN     | sarcolipin                                                                     | -0.33322 | 0.631587575 | 0.710973167 |
| SMOX    | spermine oxidase                                                               | 0.26370  | 0.091028762 | 0.138415462 |
| SMPD1   | sphingomyelin phosphodiesterase 1, acid lysosomal (acid sphingomyelinase)      | -0.21226 | 0.05534121  | 0.08971984  |
| SMPD2   | sphingomyelin phosphodiesterase 2, neutral membrane (neutral sphingomyelinase) | 0.28413  | 0.034505481 | 0.058850371 |

|         |                                                                                                      |          |             |             |
|---------|------------------------------------------------------------------------------------------------------|----------|-------------|-------------|
| SMPD3   | sphingomyelin phosphodiesterase 3, neutral membrane (neutral sphingomyelinase II)                    | -0.96384 | 2.87E-12    | 2.30E-11    |
| SMPDL3A | Sphingomyelin phosphodiesterase, acid-like 3A                                                        | 0.63198  | 0.013180267 | 0.024719081 |
| SMPDL3B | sphingomyelin phosphodiesterase, acid-like 3B                                                        | -0.09379 | 0.411763095 | 0.503448624 |
| SMS     | spermine synthase                                                                                    | 0.93165  | 3.10E-05    | 9.66E-05    |
| SOAT1   | sterol O-acyltransferase (acyl-Coenzyme A: cholesterol acyltransferase) 1                            | 2.59489  | 2.91E-26    | 6.44E-25    |
| SOAT2   | sterol O-acyltransferase 2                                                                           | -0.09078 | 0.227322322 | 0.306259961 |
| SOD1    | superoxide dismutase 1, soluble (amyotrophic lateral sclerosis 1 (adult))                            | -0.60887 | 3.52E-08    | 1.75E-07    |
| SOD2    | Superoxide dismutase 2, mitochondrial                                                                | 2.58317  | 1.37E-10    | 9.19E-10    |
| SOD3    | superoxide dismutase 3, extracellular                                                                | -0.02608 | 0.919702    | 0.943998273 |
| SORD    | sorbitol dehydrogenase                                                                               | 0.83871  | 2.00E-05    | 6.44E-05    |
| SPHK1   | sphingosine kinase 1                                                                                 | 0.76007  | 0.003063775 | 6.59E-03    |
| SPHK2   | sphingosine kinase 2                                                                                 | -0.39041 | 0.000325044 | 0.000860435 |
| SPR     | sepiapterin reductase (7,8-dihydrobiopterin:NADP+ oxidoreductase)                                    | 0.19014  | 0.302998914 | 0.391109074 |
| SPTLC1  | serine palmitoyltransferase, long chain base subunit 1                                               | 0.67814  | 1.95E-05    | 6.29E-05    |
| SPTLC2  | serine palmitoyltransferase, long chain base subunit 2                                               | 0.08534  | 0.581384695 | 0.668904971 |
| SPTLC3  | serine palmitoyltransferase, long chain base subunit 3                                               | -0.31779 | 0.000559702 | 0.001411755 |
| SQLE    | Squalene epoxidase                                                                                   | -0.57008 | 0.011844612 | 2.25E-02    |
| SQRDL   | sulfide quinone reductase-like (yeast)                                                               | 1.71442  | 2.69E-07    | 1.17E-06    |
| SRD5A1  | steroid-5-alpha-reductase, alpha polypeptide 1 (3-oxo-5 alpha-steroid delta 4-dehydrogenase alpha 1) | -0.97818 | 7.42E-06    | 2.58E-05    |
| SRD5A2  | steroid-5-alpha-reductase, alpha polypeptide 2 (3-oxo-5 alpha-steroid delta 4-dehydrogenase alpha 2) | -0.46241 | 1.98E-08    | 1.01E-07    |
| SRD5A3  | steroid 5 alpha-reductase 3                                                                          | -0.15242 | 0.342467937 | 0.433252842 |
| SRM     | spermidine synthase                                                                                  | 0.09027  | 0.611948577 | 0.693860266 |
| SRR     | serine racemase                                                                                      | 0.35038  | 0.159740396 | 0.224276399 |
| ST3GAL1 | ST3 beta-galactoside alpha-2,3-sialyltransferase 1                                                   | 0.02606  | 0.899107289 | 0.93079016  |
| ST3GAL2 | ST3 beta-galactoside alpha-2,3-sialyltransferase 2                                                   | -0.26164 | 0.000608766 | 0.001520418 |

|            |                                                                                                               |          |             |             |
|------------|---------------------------------------------------------------------------------------------------------------|----------|-------------|-------------|
| ST3GAL4    | ST3 beta-galactoside alpha-2,3-sialyltransferase 4                                                            | 0.02648  | 0.738939749 | 0.802491725 |
| ST3GAL5    | ST3 beta-galactoside alpha-2,3-sialyltransferase 5                                                            | -0.35158 | 0.007702184 | 1.52E-02    |
| ST3GAL6    | ST3 beta-galactoside alpha-2,3-sialyltransferase 6                                                            | 0.37180  | 0.120096914 | 0.17615947  |
| ST6GAL1    | ST6 beta-galactosamide alpha-2,6-sialyltransferase 1                                                          | -0.06046 | 0.598444822 | 0.682956412 |
| ST6GALNAC2 | ST6 (alpha-N-acetyl-neuraminyl-2,3-beta-galactosyl-1,3)-N-acetylgalactosaminide alpha-2,6-sialyltransferase 2 | 0.31324  | 0.288851445 | 0.374781028 |
| ST6GALNAC4 | ST6 (alpha-N-acetyl-neuraminyl-2,3-beta-galactosyl-1,3)-N-acetylgalactosaminide alpha-2,6-sialyltransferase 4 | 0.31744  | 0.034642487 | 0.059034515 |
| ST6GALNAC5 | ST6 (alpha-N-acetyl-neuraminyl-2,3-beta-galactosyl-1,3)-N-acetylgalactosaminide alpha-2,6-sialyltransferase 5 | -3.94159 | 2.42E-24    | 4.88E-23    |
| ST8SIA1    | ST8 alpha-N-acetyl-neuraminide alpha-2,8-sialyltransferase 1                                                  | 0.45855  | 0.084392787 | 0.129977679 |
| ST8SIA2    | ST8 alpha-N-acetyl-neuraminide alpha-2,8-sialyltransferase 2                                                  | -0.09320 | 0.18290195  | 0.252436975 |
| ST8SIA3    | ST8 alpha-N-acetyl-neuraminide alpha-2,8-sialyltransferase 3                                                  | -1.04438 | 7.14E-19    | 9.42E-18    |
| ST8SIA4    | ST8 alpha-N-acetyl-neuraminide alpha-2,8-sialyltransferase 4                                                  | 0.30446  | 0.084848257 | 0.130481472 |
| ST8SIA5    | ST8 alpha-N-acetyl-neuraminide alpha-2,8-sialyltransferase 5                                                  | -0.81951 | 0.030076161 | 0.052171361 |
| STAR       | steroidogenic acute regulatory protein                                                                        | -0.96414 | 2.37E-20    | 3.47E-19    |
| STARD13    | StAR-related lipid transfer (START) domain containing 13                                                      | -1.39388 | 1.96E-11    | 1.44E-10    |
| STARD3     | StAR-related lipid transfer (START) domain containing 3                                                       | 0.15711  | 0.051779755 | 0.084282019 |
| STARD5     | StAR-related lipid transfer (START) domain containing 5                                                       | 0.26928  | 0.049022961 | 0.080568861 |
| STARD7     | StAR-related lipid transfer (START) domain containing 7                                                       | 0.05203  | 0.604390378 | 0.687591291 |
| STARD8     | StAR-related lipid transfer (START) domain containing 8                                                       | 0.09188  | 0.552051425 | 0.640959764 |
| STRA6      | stimulated by retinoic acid gene 6 homolog (mouse)                                                            | 0.09194  | 0.394379247 | 0.48474789  |
| STS        | steroid sulfatase (microsomal), isozyme S                                                                     | -1.43511 | 1.46E-23    | 2.67E-22    |
| SUCLA2     | succinate-CoA ligase, ADP-forming, beta subunit                                                               | -0.53468 | 0.003322314 | 7.09E-03    |
| SUCLG1     | succinate-CoA ligase, alpha subunit                                                                           | -0.16499 | 0.197487118 | 0.269457255 |
| SUCLG2     | succinate-CoA ligase, GDP-forming, beta subunit                                                               | 2.10481  | 2.81E-26    | 6.27E-25    |
| SULF1      | sulfatase 1                                                                                                   | 0.68851  | 0.149285852 | 0.212682647 |
| SULT1A1    | sulfotransferase family, cytosolic, 1A, phenol-preferring, member 1                                           | -0.92943 | 8.01E-05    | 2.34E-04    |

|         |                                                                                            |          |             |             |
|---------|--------------------------------------------------------------------------------------------|----------|-------------|-------------|
| SULT1A2 | sulfotransferase family, cytosolic, 1A, phenol-preferring, member 2                        | -0.52143 | 0.001377882 | 3.20E-03    |
| SULT1B1 | sulfotransferase family, cytosolic, 1B, member 1                                           | -0.00397 | 0.977023242 | 0.985750993 |
| SULT1C2 | sulfotransferase family, cytosolic, 1C, member 2                                           | -0.00722 | 0.962068513 | 0.973561616 |
| SULT1E1 | sulfotransferase family 1E, estrogen-preferring, member 1                                  | -0.08739 | 0.441598967 | 0.533751903 |
| SULT2A1 | sulfotransferase family, cytosolic, 2A, dehydroepiandrosterone (DHEA)-preferring, member 1 | -0.03644 | 0.517027821 | 0.607406979 |
| SULT2B1 | sulfotransferase family, cytosolic, 2B, member 1                                           | -0.35066 | 0.000611089 | 0.001524348 |
| SULT4A1 | sulfotransferase family 4A, member 1                                                       | -3.32711 | 2.53E-46    | 1.90E-44    |
| SUOX    | sulfite oxidase                                                                            | -0.52713 | 0.002485059 | 0.005479529 |
| SV2A    | Synaptic vesicle glycoprotein 2A                                                           | -2.43394 | 8.26E-12    | 6.27E-11    |
| SV2B    | Synaptic vesicle glycoprotein 2B                                                           | -5.95412 | 3.42E-40    | 1.83E-38    |
| SV2C    | Synaptic vesicle glycoprotein 2C                                                           | -2.66810 | 1.24E-30    | 3.47E-29    |
| SYNJ1   | synaptojanin 1                                                                             | -1.99326 | 3.92E-40    | 2.03E-38    |
| SYNJ2   | synaptojanin 2                                                                             | -0.33708 | 0.001849266 | 0.004177286 |
| TALDO1  | transaldolase 1                                                                            | 0.24327  | 0.059789374 | 0.095785498 |
| TAP1    | transporter 1, ATP-binding cassette, sub-family B (MDR/TAP)                                | 1.86875  | 2.14E-12    | 1.73E-11    |
| TAP2    | transporter 2, ATP-binding cassette, sub-family B (MDR/TAP)                                | 0.30481  | 0.020528272 | 3.70E-02    |
| TAT     | tyrosine aminotransferase                                                                  | -0.08309 | 0.133615586 | 0.194028919 |
| TBXAS1  | thromboxane A synthase 1 (platelet, cytochrome P450, family 5, subfamily A)                | 0.89509  | 0.000883417 | 2.12E-03    |
| TCIRG1  | T-cell, immune regulator 1, ATPase, H+ transporting, lysosomal V0 subunit A3               | 1.30981  | 1.10E-06    | 4.41E-06    |
| TCN1    | transcobalamin I (vitamin B12 binding protein, R binder family)                            | -0.05037 | 0.604126242 | 0.687591291 |
| TCN2    | transcobalamin II; macrocytic anemia                                                       | 0.66623  | 0.000375151 | 9.77E-04    |
| TDO2    | tryptophan 2,3-dioxygenase                                                                 | 0.84445  | 0.113382435 | 0.167154815 |
| TF      | transferrin                                                                                | -1.34861 | 0.000310292 | 8.22E-04    |
| TGDS    | TDP-glucose 4,6-dehydratase                                                                | 0.87801  | 3.22E-05    | 9.99E-05    |
| TH      | tyrosine hydroxylase                                                                       | -0.01922 | 0.846824988 | 0.890633833 |

|         |                                                                    |          |             |             |
|---------|--------------------------------------------------------------------|----------|-------------|-------------|
| THNSL1  | threonine synthase-like 1 ( <i>S. cerevisiae</i> )                 | -0.28060 | 0.054867096 | 0.089022192 |
| THNSL2  | threonine synthase-like 2 ( <i>S. cerevisiae</i> )                 | -0.25887 | 0.341219362 | 0.431949675 |
| THTPA   | Thiamine triphosphatase                                            | -0.92862 | 2.20E-06    | 8.41E-06    |
| TK1     | thymidine kinase 1, soluble                                        | 0.90305  | 0.000207681 | 5.67E-04    |
| TK2     | thymidine kinase 2, mitochondrial                                  | 0.08241  | 0.532004222 | 0.621946281 |
| TKT     | transketolase (Wernicke-Korsakoff syndrome)                        | 0.06448  | 0.7212153   | 0.786766446 |
| TKTL1   | transketolase-like 1                                               | 0.29881  | 0.286013351 | 0.371543222 |
| TM7SF2  | transmembrane 7 superfamily member 2                               | -0.52710 | 0.016739309 | 0.030825195 |
| TMCO3   | Transmembrane and coiled-coil domains 3                            | 0.46661  | 0.002644315 | 5.79E-03    |
| TMEM104 | Transmembrane protein 104                                          | 0.21348  | 0.050792377 | 0.083073935 |
| TMLHE   | trimethyllysine hydroxylase, epsilon                               | -0.07721 | 0.480125801 | 0.572490178 |
| TPCN1   | two pore segment channel 1                                         | -0.47996 | 0.026555663 | 0.046864291 |
| TPH1    | tryptophan hydroxylase 1 (tryptophan 5-monooxygenase)              | 0.20335  | 0.25261323  | 0.33544265  |
| TPI1    | triosephosphate isomerase 1                                        | -0.05783 | 0.701909708 | 0.771759024 |
| TPK1    | thiamin pyrophosphokinase 1                                        | -0.05221 | 0.808280679 | 0.859432333 |
| TPMT    | thiopurine S-methyltransferase                                     | -0.31264 | 0.020138051 | 0.036391695 |
| TPO     | thyroid peroxidase                                                 | -0.14371 | 0.016591726 | 0.030581123 |
| TREH    | trehalase (brush-border membrane glycoprotein)                     | -0.23940 | 1.51E-05    | 4.96E-05    |
| TRPA1   | transient receptor potential cation channel, subfamily A, member 1 | -0.01139 | 0.866166719 | 0.904890514 |
| TRPC1   | transient receptor potential cation channel, subfamily C, member 1 | -0.21031 | 0.291881366 | 0.378440572 |
| TRPC3   | transient receptor potential cation channel, subfamily C, member 3 | -0.20301 | 0.02563864  | 0.045522581 |
| TRPC4   | transient receptor potential cation channel, subfamily C, member 4 | -0.09934 | 0.263359139 | 0.348120371 |
| TRPC5   | transient receptor potential cation channel, subfamily C, member 5 | -0.10463 | 0.028906878 | 0.050574599 |
| TRPC6   | transient receptor potential cation channel, subfamily C, member 6 | 0.21096  | 0.099736499 | 0.149310973 |
| TRPC7   | transient receptor potential cation channel, subfamily C, member 7 | -0.07287 | 0.246926367 | 0.328750035 |

|        |                                                                    |          |             |             |
|--------|--------------------------------------------------------------------|----------|-------------|-------------|
| TRPM1  | transient receptor potential cation channel, subfamily M, member 1 | -0.20477 | 4.05E-06    | 1.48E-05    |
| TRPM2  | transient receptor potential cation channel, subfamily M, member 2 | -0.70922 | 5.61E-07    | 2.35E-06    |
| TRPM3  | transient receptor potential cation channel, subfamily M, member 3 | 0.07952  | 0.43612446  | 0.527762516 |
| TRPM4  | transient receptor potential cation channel, subfamily M, member 4 | -0.00772 | 0.949184816 | 0.965812177 |
| TRPM6  | transient receptor potential cation channel, subfamily M, member 6 | -0.08881 | 0.127750574 | 0.186444305 |
| TRPM8  | transient receptor potential cation channel, subfamily M, member 8 | 0.03342  | 0.723048633 | 0.787758773 |
| TRPV1  | transient receptor potential cation channel, subfamily V, member 1 | -0.55719 | 0.000132045 | 0.000372844 |
| TRPV2  | transient receptor potential cation channel, subfamily V, member 2 | -0.01153 | 0.942855678 | 0.960333463 |
| TRPV4  | transient receptor potential cation channel, subfamily V, member 4 | -0.05778 | 0.307381342 | 0.395760778 |
| TRPV5  | transient receptor potential cation channel, subfamily V, member 5 | -0.33621 | 1.70E-07    | 7.66E-07    |
| TRPV6  | transient receptor potential cation channel, subfamily V, member 6 | -0.15938 | 0.028741982 | 0.050357116 |
| TST    | thiosulfate sulfurtransferase (rhodanese)                          | 0.04359  | 0.847692257 | 0.891084983 |
| TSTA3  | tissue specific transplantation antigen P35B                       | 0.09363  | 0.515836234 | 0.606805027 |
| TTYH1  | Tweety homolog 1 (Drosophila)                                      | -1.03864 | 0.057306139 | 9.24E-02    |
| TXNRD1 | Thioredoxin reductase 1                                            | 0.76832  | 0.000197876 | 5.43E-04    |
| TXNRD2 | Thioredoxin reductase 2                                            | -0.01011 | 0.900832017 | 0.932005847 |
| TXNRD3 | Thioredoxin reductase 3                                            | 0.69127  | 8.02E-07    | 3.30E-06    |
| TYMP   | Thymidine phosphorylase                                            | 0.47524  | 0.010103509 | 1.95E-02    |
| TYMS   | thymidylate synthetase                                             | 1.59478  | 5.05E-18    | 6.22E-17    |
| TYR    | tyrosinase (oculocutaneous albinism IA)                            | -0.52924 | 1.31E-07    | 5.99E-07    |
| TYRP1  | tyrosinase-related protein 1                                       | -1.76530 | 4.00E-20    | 5.73E-19    |
| UAP1   | UDP-N-acetylglucosamine pyrophosphorylase 1                        | 0.11604  | 0.544454545 | 0.633224308 |
| UAP1L1 | UDP-N-acetylglucosamine pyrophosphorylase 1-like 1                 | 0.87681  | 1.22E-05    | 4.07E-05    |
| UCK2   | uridine-cytidine kinase 2                                          | 0.63935  | 0.011536221 | 0.021939324 |
| UCKL1  | uridine-cytidine kinase 1-like 1                                   | 0.73626  | 4.62E-05    | 1.40E-04    |



|         |                                                                                                      |          |             |             |
|---------|------------------------------------------------------------------------------------------------------|----------|-------------|-------------|
| UCP1    | uncoupling protein 1 (mitochondrial, proton carrier)                                                 | -0.05827 | 0.378265305 | 0.469196684 |
| UCP2    | uncoupling protein 2 (mitochondrial, proton carrier)                                                 | 1.25726  | 1.33E-05    | 4.40E-05    |
| UCP3    | uncoupling protein 3 (mitochondrial, proton carrier)                                                 | -0.29792 | 7.59E-08    | 3.62E-07    |
| UEVLD   | UEV and lactate/malate dehydrogenase domains                                                         | 1.25191  | 2.27E-19    | 3.08E-18    |
| UGCG    | UDP-glucose ceramide glucosyltransferase                                                             | 0.44786  | 0.03378607  | 5.77E-02    |
| UGDH    | UDP-glucose dehydrogenase                                                                            | 1.79910  | 1.90E-13    | 1.70E-12    |
| UGP2    | UDP-glucose pyrophosphorylase 2                                                                      | -1.02967 | 1.12E-08    | 5.86E-08    |
| UGT2A3  | UDP glucuronosyltransferase 2 family, polypeptide A3                                                 | 0.01678  | 0.692040226 | 0.762557062 |
| UGT2B15 | UDP glucuronosyltransferase 2 family, polypeptide B15                                                | -0.09504 | 0.112613597 | 0.166141831 |
| UGT2B17 | UDP glucuronosyltransferase 2 family, polypeptide B17                                                | -0.05337 | 0.668511205 | 0.742262851 |
| UGT2B28 | UDP glucuronosyltransferase 2 family, polypeptide B28                                                | -0.19212 | 0.150850025 | 0.214011235 |
| UGT2B4  | UDP glucuronosyltransferase 2 family, polypeptide B4                                                 | 0.02768  | 0.680352936 | 0.753353769 |
| UGT8    | UDP glycosyltransferase 8 (UDP-galactose ceramide galactosyltransferase)                             | -1.21600 | 0.026907159 | 0.047420278 |
| UMPS    | uridine monophosphate synthetase (orotate phosphoribosyl transferase and orotidine-5'-decarboxylase) | 1.36977  | 4.50E-15    | 4.46E-14    |
| UPB1    | ureidopropionase, beta                                                                               | -0.17617 | 0.013397394 | 0.02508002  |
| UPP1    | uridine phosphorylase 1                                                                              | 1.66437  | 3.42E-06    | 1.27E-05    |
| UQCRB   | ubiquinol-cytochrome c reductase binding protein                                                     | -0.22405 | 0.047166255 | 0.078149142 |
| UQCRC1  | ubiquinol-cytochrome c reductase core protein I                                                      | -0.43244 | 0.002074548 | 4.64E-03    |
| UQCRC2  | ubiquinol-cytochrome c reductase core protein II                                                     | -0.43058 | 0.008447305 | 0.016544673 |
| UQCDFS1 | ubiquinol-cytochrome c reductase, Rieske iron-sulfur polypeptide 1                                   | -0.49513 | 0.000819424 | 1.99E-03    |
| UQCRH   | ubiquinol-cytochrome c reductase hinge protein                                                       | -0.20467 | 0.183935796 | 0.253691637 |
| UQCRQ   | ubiquinol-cytochrome c reductase, complex III subunit VII, 9.5kDa                                    | 0.23392  | 0.080416968 | 0.124895107 |
| UROD    | uroporphyrinogen decarboxylase                                                                       | 0.72084  | 2.17E-05    | 6.94E-05    |
| UROS    | uroporphyrinogen III synthase (congenital erythropoietic porphyria)                                  | -1.92620 | 4.82E-18    | 6.01E-17    |
| UST     | uronyl-2-sulfotransferase                                                                            | 1.02737  | 0.000135474 | 3.81E-04    |

|        |                                                |          |             |             |
|--------|------------------------------------------------|----------|-------------|-------------|
| UXS1   | UDP-glucuronate decarboxylase 1                | -0.20520 | 0.261625342 | 0.346504443 |
| VDAC1  | voltage-dependent anion channel 1              | -0.80523 | 6.43E-06    | 2.27E-05    |
| VDAC2  | voltage-dependent anion channel 2              | -0.47359 | 0.000619195 | 1.54E-03    |
| VDAC3  | voltage-dependent anion channel 3              | -0.39585 | 0.026461076 | 0.046737939 |
| VKORC1 | vitamin K epoxide reductase complex, subunit 1 | 1.02785  | 7.15E-09    | 3.92E-08    |
| WWOX   | WW domain containing oxidoreductase            | -0.39627 | 0.042953914 | 0.071931883 |
| XDH    | xanthine dehydrogenase                         | -0.39372 | 1.15E-06    | 4.60E-06    |
| XYLB   | xylulokinase homolog (H. influenzae)           | -0.04888 | 0.296344804 | 0.383249992 |
| XYLT1  | xylosyltransferase I                           | -1.23979 | 0.000461647 | 1.18E-03    |
| XYLT2  | xylosyltransferase II                          | 0.18098  | 0.11954258  | 0.175472971 |

**Supplemental Table 2: Correlation between NNMT mRNA expression and DNA methylation signatures in TCGA GBM dataset**

| Name                                                    | Description                                                                                                                                                                                               | Correlation (Spearman) | p-val      | FDR-adj. p-val |
|---------------------------------------------------------|-----------------------------------------------------------------------------------------------------------------------------------------------------------------------------------------------------------|------------------------|------------|----------------|
| MEISSNER_BRAIN_ICP_WITH_H3K4ME3                         | > Genes with intermediate-CpG-density promoters (ICP) bearing histone H3 trimethylation mark at K4 (H3K4me3) in brain.                                                                                    | -0.3996792             | 4.7177E-22 | 3.5923E-21     |
| MEISSNER_NPC_HCP_WITH_H3K4ME2_AND_H3K27ME3              | > Genes with high-CpG-density promoters (HCP) bearing histone H3 dimethylation mark at K4 (H3K4me2) and trimethylation mark at K27 (H3K27me3) in neural precursor cells (NPC).                            | -0.242976              | 1.1401E-08 | 6.625E-08      |
| CHENG_IMPRINTED_BY ESTRADIOL                            | > Genes whose CpG islands became hypermethylated in breast progenitor cells pre-exposed to estradiol [PubChem=5757].                                                                                      | -0.2970832             | 2.0042E-12 | 7.0862E-12     |
| BIOCARTA_CARM1_PATHWAY                                  | > Transcription Regulation by Methyltransferase of CARM1                                                                                                                                                  | -0.1905648             | 8.5596E-06 | 1.6296E-05     |
| ACEVEDO_METHYLATED_IN_LIVER_CANCER_DN                   | > Genes whose DNA is hyper-methylated in hepatocellular carcinoma (HCC) compared to normal liver.                                                                                                         | -0.1381521             | 0.00131642 | 0.0022089      |
| MEISSNER_NPC_HCP_WITH_H3K4ME3_AND_H3K27ME3              | > Genes with high-CpG-density promoters (HCP) bearing histone H3 trimethylation marks at K4 (H3K4me3) and K27 (H3K27me3) in neural precursor cells (NPC).                                                 | -0.1339581             | 0.00184598 | 0.00299594     |
| MISSIAGLIA_REGULATED_BY METHYLATION_DN                  | > Genes down-regulated in PaCa44 and CFPAC1 cells (pancreatic cancer) after treatment with decitabine [PubChem=451668], a DNA hypomethylating agent similar to azacitidine [PubChem=9444].                | -0.1134212             | 0.00845924 | 0.01268886     |
| SCHLESINGER_H3K27ME3_IN_NORMAL_AND_METHYLATED_IN_CANCER | > Genes bearing the H3K27me3 mark in normal cells; their DNA is methylated in cancer cells.                                                                                                               | -0.1091441             | 0.01130067 | 0.01649228     |
| ACEVEDO_LIVER_CANCER_WITH_H3K9ME3                       | > Genes whose promoters display higher histone H3 trimethylation mark at K9 (H3K9me3) in hepatocellular carcinoma (HCC) compared to normal liver. combined UP & DN                                        | -0.097933              | 0.02310346 | 0.03090868     |
| TANAKA_METHYLATED_IN_ESOPHAGEAL_CARCINOMA               | > Genes with hypermethylated DNA in all four esophageal squamous cell carcinoma (ESCC) lines analyzed.                                                                                                    | -0.0565184             | 0.19055743 | 0.23006324     |
| LOPEZ_MBD_TARGETS_IMPRINTED_AND_X_LINKED                | > X chromosome and imprinted genes up-regulated in HeLa cells (cervical cancer) after knockdown of the MBD (methyl-CpG binding domain) proteins by RNAi.                                                  | -0.0471601             | 0.27486237 | 0.30922017     |
| LOPES_METHYLATED_IN_COLON_CANCER                        | > Genes methylated aberrantly in HCT116 and Colo320 (colon cancer) cells. combined UP & DN                                                                                                                | -0.0342108             | 0.42841973 | 0.46101688     |
| HATADA_METHYLATED_IN_LUNG_CANCER_DN                     | > Genes with unmethylated DNA in lung cancer samples.                                                                                                                                                     | -0.0299747             | 0.48780967 | 0.51928126     |
| ACEVEDO_LIVER_CANCER_WITH_H3K9ME3_DN                    | > Genes whose promoters display lower histone H3 trimethylation mark at K9 (H3K9me3) in hepatocellular carcinoma (HCC) compared to normal liver.                                                          | -0.0200015             | 0.64343751 | 0.66354493     |
| LOPES_METHYLATED_IN_COLON_CANCER_UP                     | > Genes methylated aberrantly in HCT116 and Colo320 (colon cancer) cells.                                                                                                                                 | -0.0170452             | 0.6932342  | 0.70030802     |
| MEISSNER_NPC_HCP_WITH_H3K27ME3                          | > Genes with high-CpG-density promoters (HCP) bearing the H3K27 tri-methylation (H3K27me3) mark in neural precursor cells (NPC).                                                                          | 0.01829202             | 0.6720553  | 0.68591211     |
| MEISSNER_NPC_ICP_WITH_H3K4ME3                           | > Genes with intermediate-CpG-density promoters (ICP) bearing histone H3 trimethylation mark at K4 (H3K4me3) in neural precursor cells (NPC).                                                             | 0.02333873             | 0.58909209 | 0.61389597     |
| HATADA_METHYLATED_IN_LUNG_CANCER                        | > Genes with hypermethylated DNA in lung cancer samples. combined UP & DN                                                                                                                                 | 0.02788018             | 0.51873462 | 0.54632689     |
| HATADA_METHYLATED_IN_LUNG_CANCER_UP                     | > Genes with hypermethylated DNA in lung cancer samples.                                                                                                                                                  | 0.03450262             | 0.42448827 | 0.46101688     |
| MEISSNER_NPC_HCP_WITH_H3K4ME2                           | > Genes with high-CpG-density promoters (HCP) bearing histone H3 dimethylation mark at K4 (H3K4me2) in neural precursor cells (NPC).                                                                      | 0.03473874             | 0.42132325 | 0.46101688     |
| ACEVEDO_LIVER_CANCER_WITH_H3K27ME3                      | > Genes whose promoters display higher levels of histone H3 trimethylation mark at K27 (H3K27me3) in hepatocellular carcinoma (HCC) compared to normal liver. combined UP & DN                            | 0.03527158             | 0.41423172 | 0.46077461     |
| LOPES_METHYLATED_IN_COLON_CANCER_DN                     | > Genes un-methylated aberrantly in HCT116 and Colo320 (colon cancer) cells.                                                                                                                              | 0.04756462             | 0.27076157 | 0.30810799     |
| ACEVEDO_LIVER_CANCER_WITH_H3K27ME3_DN                   | > Genes whose promoters display lower levels of histone H3 trimethylation mark at K27 (H3K27me3) in hepatocellular carcinoma (HCC) compared to normal liver.                                              | 0.05184132             | 0.22996032 | 0.26783614     |
| WEBER_METHYLATED_ICP_IN_FIBROBLAST                      | > Germ-line-specific genes with intermediate-CpG-density promoters (ICP) that are methylated in primary fibroblasts.                                                                                      | 0.05423292             | 0.20914433 | 0.24649153     |
| MEISSNER_NPC_ICP_WITH_H3_UNMETHYLATED                   | > Genes with intermediate-CpG-density promoters (ICP) that have no histone H3 methylation marks in neural precursor cells (NPC).                                                                          | 0.05943197             | 0.16865917 | 0.20613898     |
| WEBER_METHYLATED_ICP_IN_SPERM_DN                        | > Unmethylated germ-line-specific genes with intermediate-CpG-density promoters (ICP) in sperm.                                                                                                           | 0.06299763             | 0.14449073 | 0.17880728     |
| WEBER_METHYLATED_HCP_IN_SPERM_DN                        | > Unmethylated germ-line-specific genes with high-CpG-density promoters (HCP) in sperm.                                                                                                                   | 0.06395481             | 0.13847674 | 0.17353414     |
| MEISSNER_BRAIN_HCP_WITH_H3_UNMETHYLATED                 | > Genes with high-CpG-density promoters (HCP) that have no histone H3 methylation marks in brain.                                                                                                         | 0.1056689              | 0.01420095 | 0.02037528     |
| ACEVEDO_LIVER_CANCER_WITH_H3K27ME3_UP                   | > Genes whose promoters display higher levels of histone H3 trimethylation mark at K27 (H3K27me3) in hepatocellular carcinoma (HCC) compared to normal liver.                                             | 0.11621766             | 0.00696468 | 0.01060775     |
| MEISSNER_BRAIN_HCP_WITH_H3K27ME3                        | > Genes with high-CpG-density promoters (HCP) bearing the H3K27 tri-methylation (H3K27me3) mark in brain.                                                                                                 | 0.22437009             | 1.4459E-07 | 3.0456E-07     |
| HOOQUE_METHYLATED_IN_CANCER                             | > Genes whose DNA was methylated both in primary tumors and across a panel of cancer cell lines.                                                                                                          | 0.22678134             | 1.0529E-07 | 2.266E-07      |
| SUZUKI_RESPONSE_TO_TSA_AND_DECITABINE_1B                | > Genes with some basal expression and partially methylated promoters, up-regulated by the combination of TSA and decitabine [PubChem=5562;451668] in RKO cells (colorectal cancer).                      | 0.24930283             | 4.5763E-09 | 1.105E-08      |
| SCHLESINGER_METHYLATED_DE_NOVO_IN_CANCER                | > Genes bearing H3K27me3 mark or whose promoters are bound by the polycomb proteins SUZ12 or EED [GeneID=23512;8726]; their DNA is methylated de novo in cancer.                                          | 0.26258695             | 6.1961E-10 | 1.7039E-09     |
| MEISSNER_NPC_HCP_WITH_H3_UNMETHYLATED                   | > Genes with high-CpG-density promoters (HCP) that have no histone H3 methylation marks in neural precursor cells (NPC).                                                                                  | 0.33695959             | 9.4603E-16 | 3.9024E-15     |
| WEBER_METHYLATED_IN_COLON_CANCER                        | > Genes identified as hypermethylated in SW48 cells (colon cancer).                                                                                                                                       | 0.29426463             | 3.2998E-12 | 1.0889E-11     |
| SUZUKI_RESPONSE_TO_TSA                                  | > Genes up-regulated by TSA alone [PubChem=5562], with non-hypermethylated promoters, in RKO cells (colorectal cancer).                                                                                   | 0.35602785             | 1.6019E-17 | 7.5519E-17     |
| HELLER_SILENCED_BY METHYLATION                          | > Genes up-regulated in at least one of three multiple myeloma (MM) cell lines treated with the DNA hypomethylating agent decitabine (5-aza-2'-deoxycytidine) [PubChem=451668]. combined UP & DN          | 0.34908999             | 7.2973E-17 | 3.141E-16      |
| MEISSNER_BRAIN_HCP_WITH_H3K4ME2_AND_H3K27ME3            | > Genes with high-CpG-density promoters (HCP) bearing bivalent histone H3 dimethylation mark at K4 (H3K4me2) and trimethylation mark at K27 (H3K27me3) in brain.                                          | 0.41368884             | 1.1744E-23 | 1.057E-22      |
| MISSIAGLIA_REGULATED_BY METHYLATION                     | > Genes up-regulated in PaCa44 and CFPAC1 cells (pancreatic cancer) after treatment with decitabine [PubChem=451668], a DNA hypomethylating agent similar to azacitidine [PubChem=9444]. combined UP & DN | 0.36836                | 9.8502E-19 | 5.4176E-18     |
| SUZUKI_RESPONSE_TO_TSA_AND_DECITABINE_1A                | > Genes basally silent, with hypermethylated promoters, up-regulated by the combination of TSA and decitabine [PubChem=5562;451668] in RKO cells (colorectal cancer).                                     | 0.39456864             | 1.738E-21  | 1.1471E-20     |
| MCGARVEY_SILENCED_BY METHYLATION_IN_COLON_CANCER        | > Genes silenced in HCT116 cells (colon cancer) by methylation of CpG islands in their promoters.                                                                                                         | 0.350426               | 5.4653E-17 | 2.4594E-16     |
| HELLER_SILENCED_BY METHYLATION_DN                       | > Genes down-regulated in at least one of three multiple myeloma (MM) cell lines treated with the DNA hypomethylating agent decitabine (5-aza-2'-deoxycytidine) [PubChem=451668].                         | 0.36596578             | 1.7089E-18 | 8.9043E-18     |
| MEISSNER_BRAIN_HCP_WITH_H3K4ME3_AND_H3K27ME3            | > Genes with high-CpG-density promoters (HCP) bearing histone H3 dimethylation at K4 (H3K4me2) and trimethylation at K27 (H3K27me3) in brain.                                                             | 0.35712023             | 1.2574E-17 | 6.2241E-17     |
| WU_SILENCED_BY METHYLATION_IN_BLADDER_CANCER            | > Genes silenced by DNA methylation in bladder cancer cell lines.                                                                                                                                         | 0.46517187             | 3.0635E-30 | 3.7911E-29     |
| LOPEZ_MBD_TARGETS                                       | > Genes up-regulated in HeLa cells (cervical cancer) after simultaneous knockdown of all three MBD (methyl-CpG binding domain) proteins MeCP2, MBD1 and MBD2 [GeneID=4204;4152;8932] by RNAi.             | 0.45178479             | 2.0315E-28 | 2.0112E-27     |
| HELLER_SILENCED_BY METHYLATION_UP                       | > Genes up-regulated in at least one of three multiple myeloma (MM) cell lines treated with the DNA hypomethylating agent decitabine (5-aza-2'-deoxycytidine) [PubChem=451668].                           | 0.55152437             | 3.8289E-44 | 9.4766E-43     |
| NOUSHMEHR_GBM_SILENCED_BY METHYLATION                   | > Top 50 most differentially hypermethylated and down-regulated genes in proneural G-CIMP (a CpG island methylator phenotype) GBM (glioblastoma multiforme) tumors.                                       | 0.58057938             | 8.4068E-50 | 2.7742E-48     |
| MISSIAGLIA_REGULATED_BY METHYLATION_UP                  | > Genes up-regulated in PaCa44 and CFPAC1 cells (pancreatic cancer) after treatment with decitabine [PubChem=451668], a DNA hypomethylating agent similar to azacitidine [PubChem=9444].                  | 0.63398856             | 7.965E-62  | 3.9427E-60     |

### Supplementary Table 3

#### ChiP-PCR Primers

|              |                        |
|--------------|------------------------|
| NNMT R1 FWD  | CTTCTCCGGGAATTTTCATCA  |
| NNMT R1 REV  | CTGCCCTCCTTCTCTTTTCCT  |
| NNMT R2 FWD  | GTGGGAATGCACGAAAGAAT   |
| NNMT R2 REV  | CAGCTACTTGGGAGGCTGAG   |
| NNMT R3 FWD  | CTTGGCATCCTTCTCAAAGC   |
| NNMT R3 REV  | GACCATAAGGGCGTCACTGT   |
| NAMPT R1 FWD | ACGCGCAGTTACTCACCTTT   |
| NAMPT R1 REV | TCGGGAAAAGTCAAACCATC   |
| NAMPT R2 FWD | CCAAGAGAACACAAGAGGAGGT |
| NAMPT R2 REV | TTGAAATCGAGCCAAGATCC   |
| NAMPT R3 FWD | CAACGAGAACACCAGCTCAA   |
| NAMPT R3 REV | GTATTGTCACGGTGGCTCCT   |
| IL6 R1 FWD   | TGCACTTTTCCCCCTAGTTG   |
| IL6 R1 REV   | GCCTCAGACATCTCCAGTCC   |
| IL6 R2 FWD   | AGAAGGACGCAGCACAAGAT   |
| IL6 R2 REV   | GAATGAAGAGGCTGGCTTTG   |
| ASCL1 R1 FWD | CAAGAGAGCTTCACCCCAAG   |
| ASCL1 R1 REV | CTCCATTCAGCTGGGTTTGT   |
| ASCL1 R2 FWD | TTCACCCCAAGTCTTTCCAC   |
| ASCL1 R2 REV | CTCCATTCAGCTGGGTTTGT   |

#### qMethyl PCR Primers

|              |                      |
|--------------|----------------------|
| CTSZ_Reg1_F1 | CCCAGGACGTGGTTTTGTAA |
| CTSZ_Reg1_R1 | TTCCGGGAATGGTCATGG   |

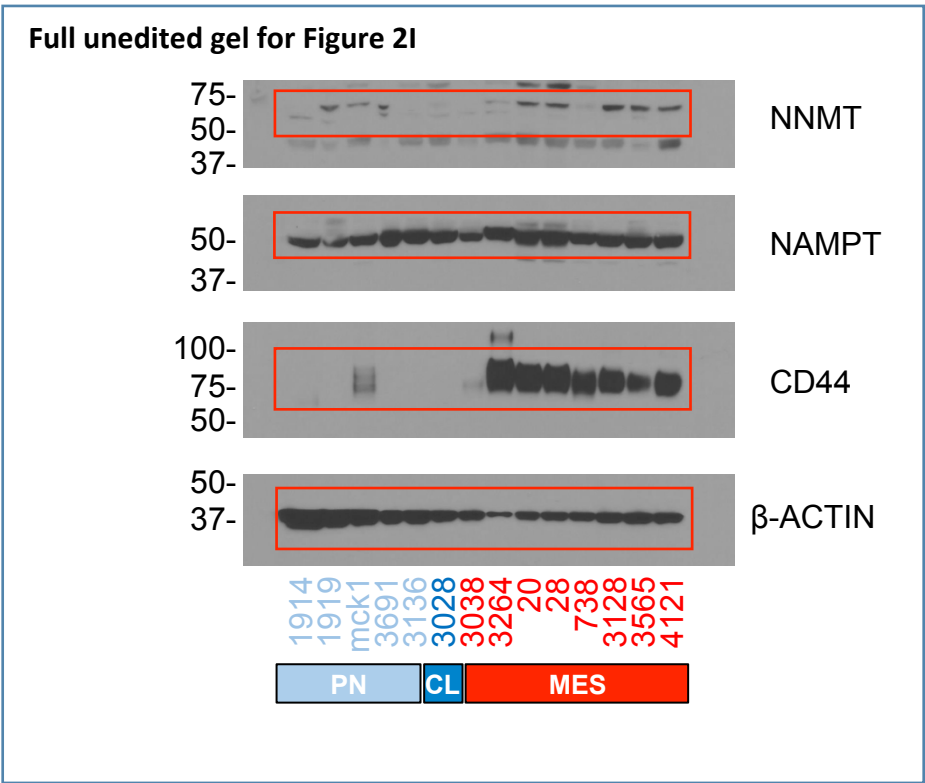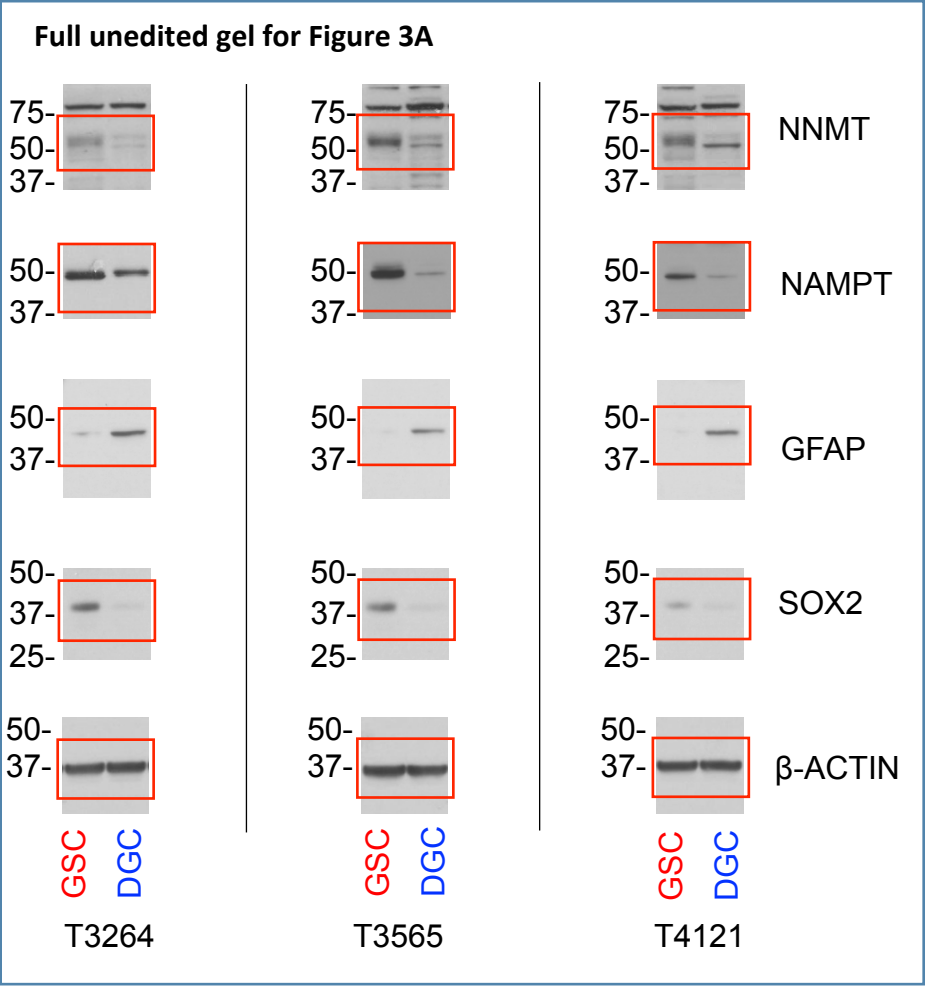

Full unedited gel for Figure 4G

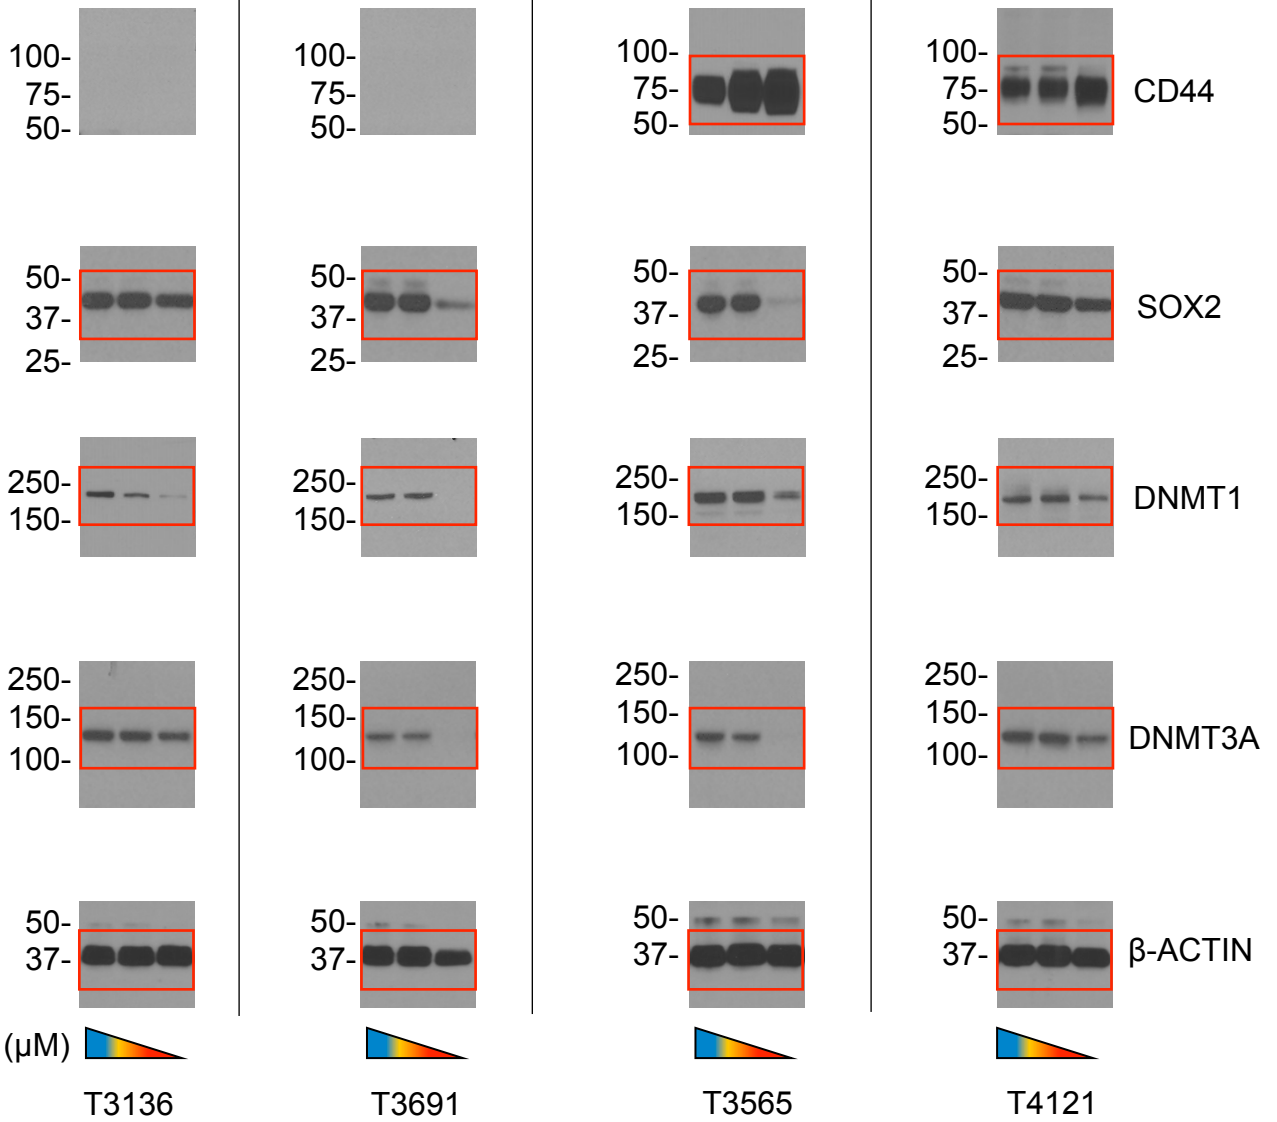

Full unedited gel for Figure 5D

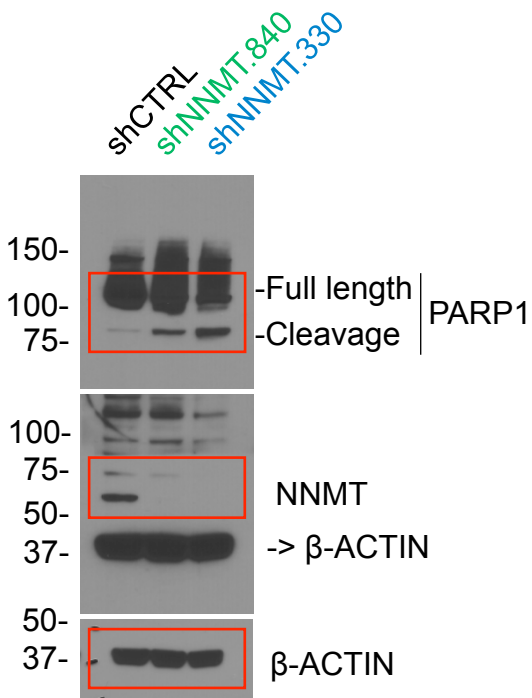

Full unedited gel for Figure 6D

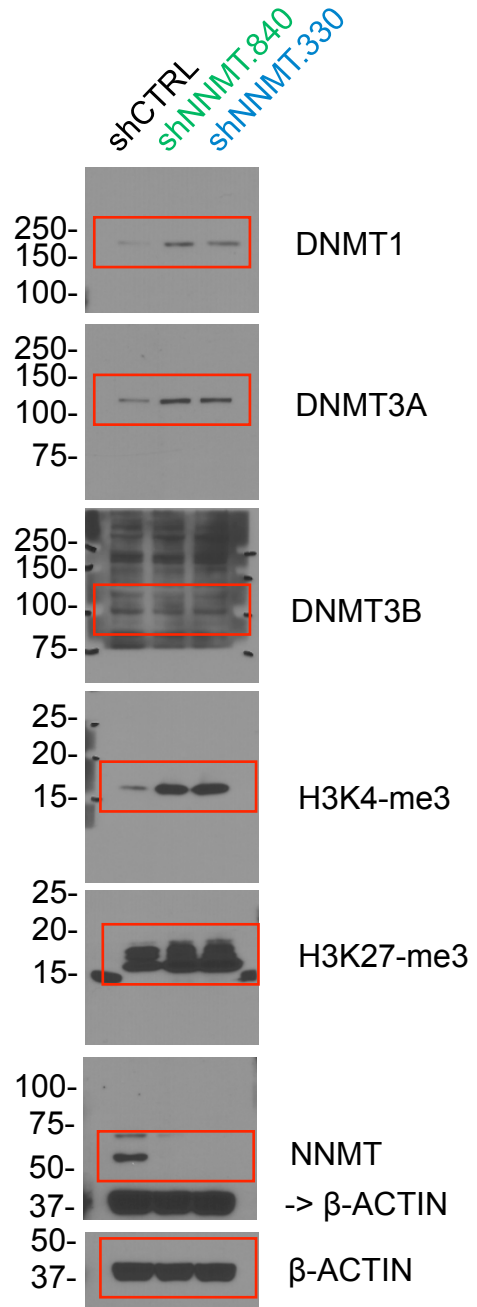

Supplement: jciinsight-2-90019-s001.pdf [file jciinsight-2-90019-s001.pdf]
